# Supplementary material for: Evolutionary Subdivision of Domestic Chickens: Implications for Local Breeds as Assessed by Phenotype and Genotype in Comparison to Commercial and Fancy Breeds
Source: MDPI journal article supplement (doi:10.3390/agriculture11100914), 2021-09-24
Supplement: s1 [file s1]

**Supporting Info S3 (a–e):** Boxplots and significance of differences in allele frequencies for the studied five SNPs at the locus *NCAPG-LCORL* as assessed for chicken breed groups according to TCM: egg, egg-type; m, meat-type; egm, egg-meat; meg, meat-egg; b, game; and f, fancy.

**a:** GGaluga265969

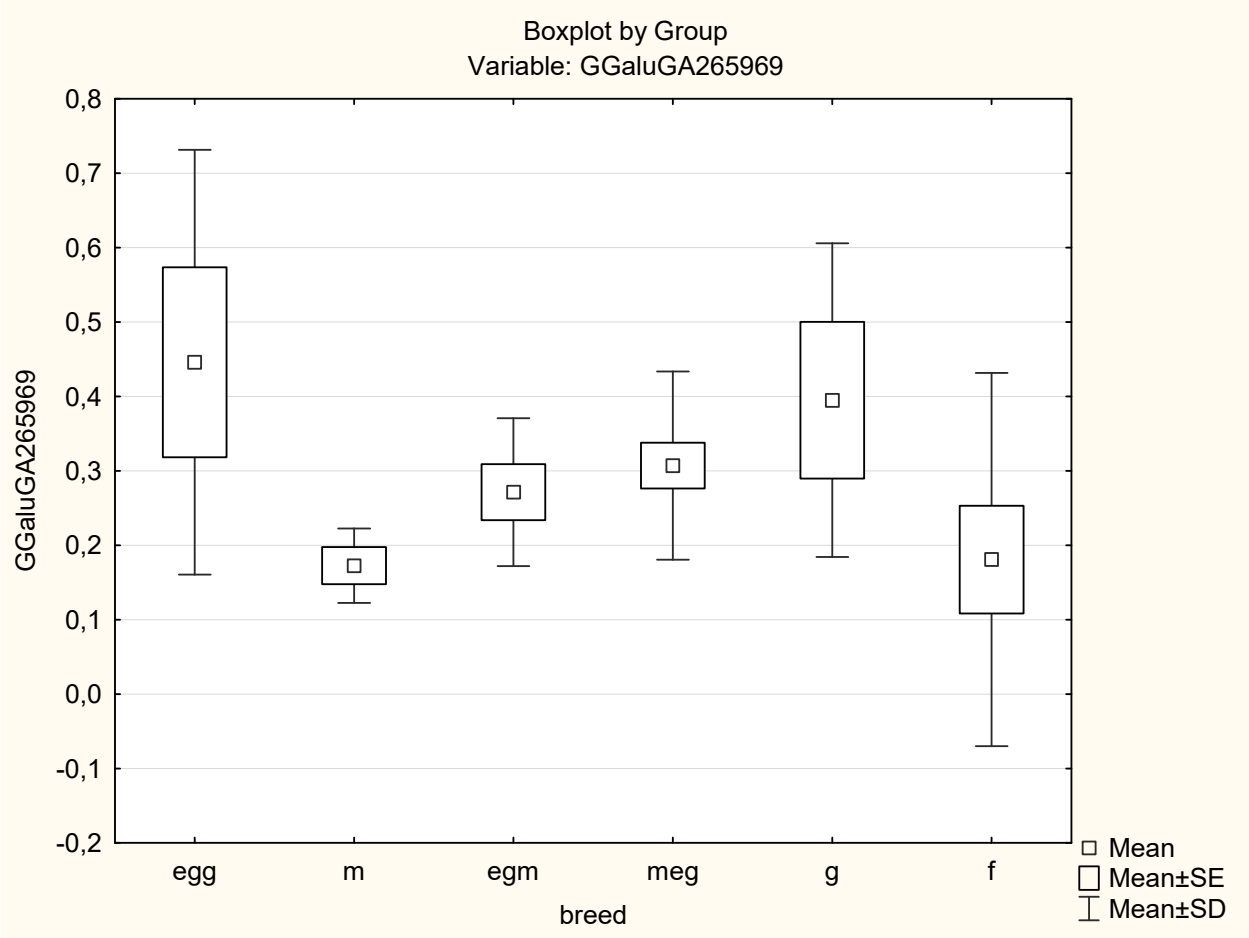

**b:** GGaluga265966

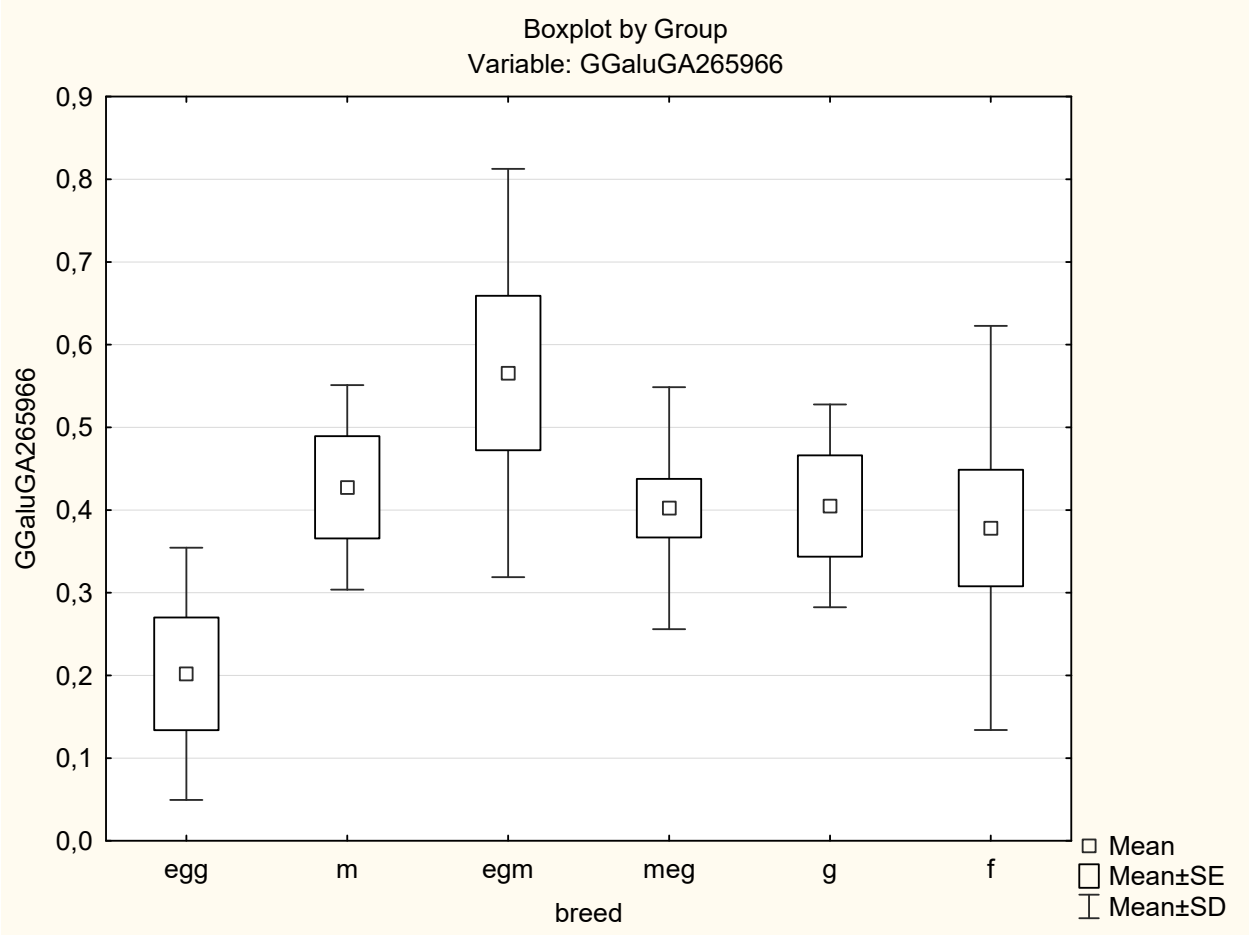

c: rs15619223

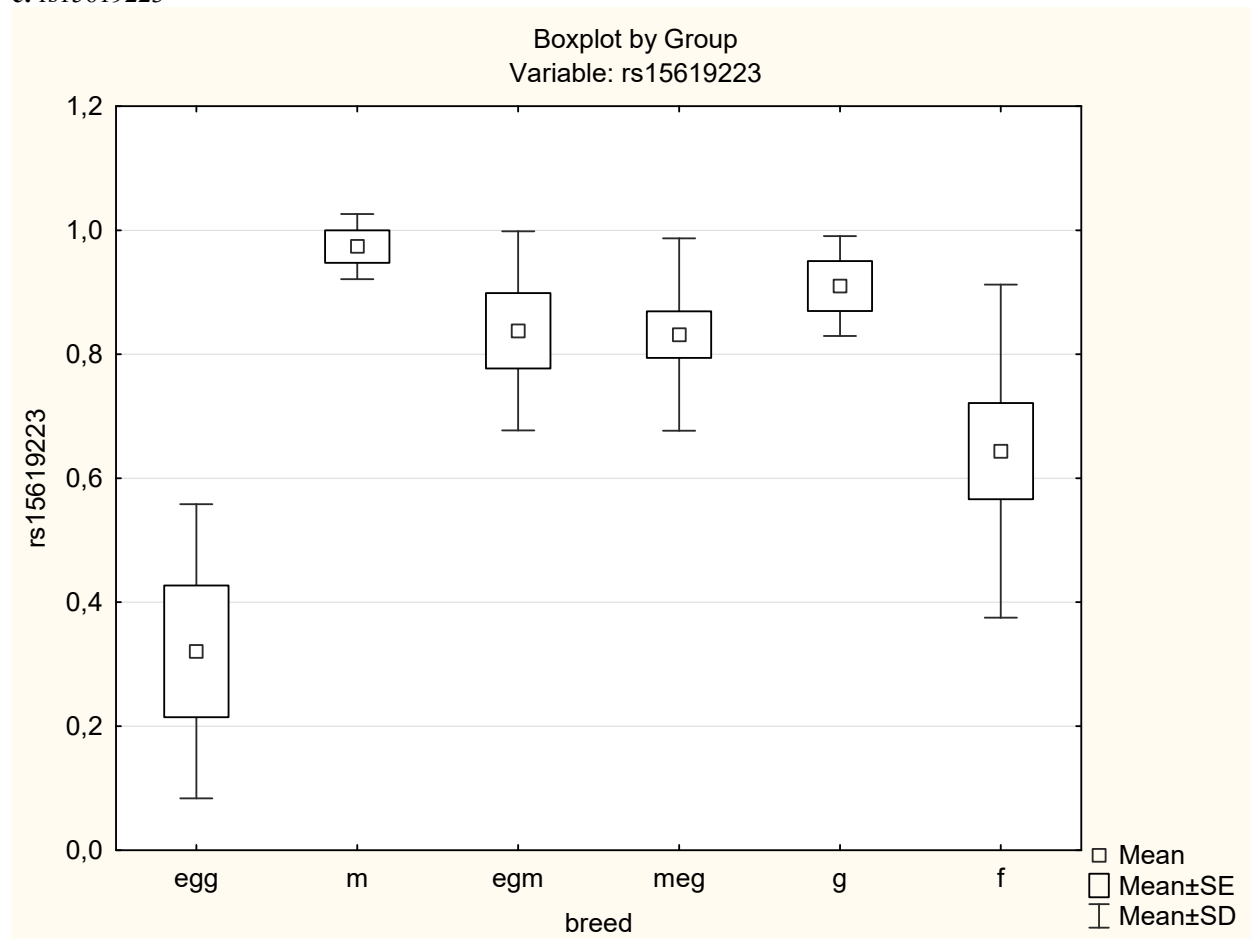

d: rs14491017

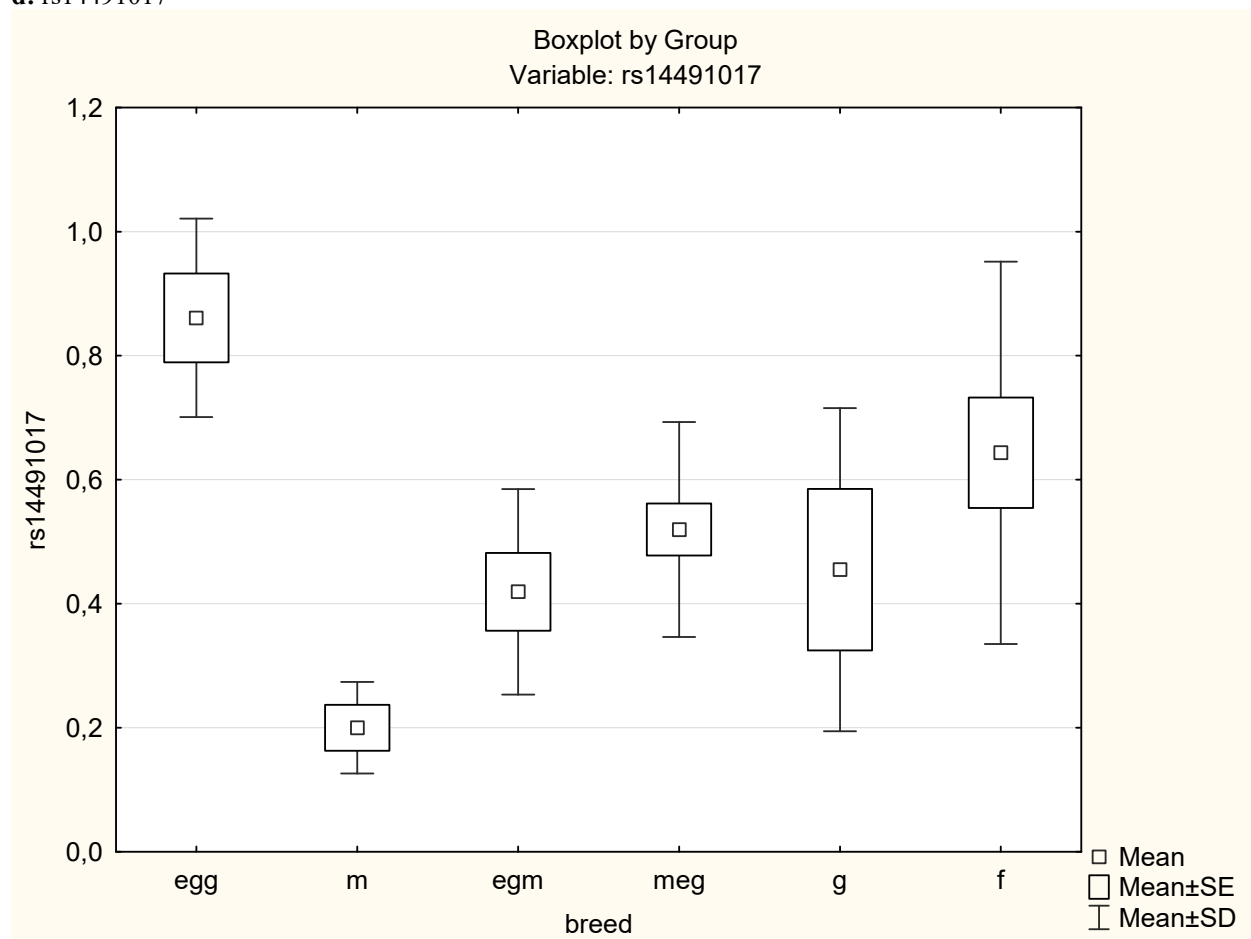

e: rs14491028

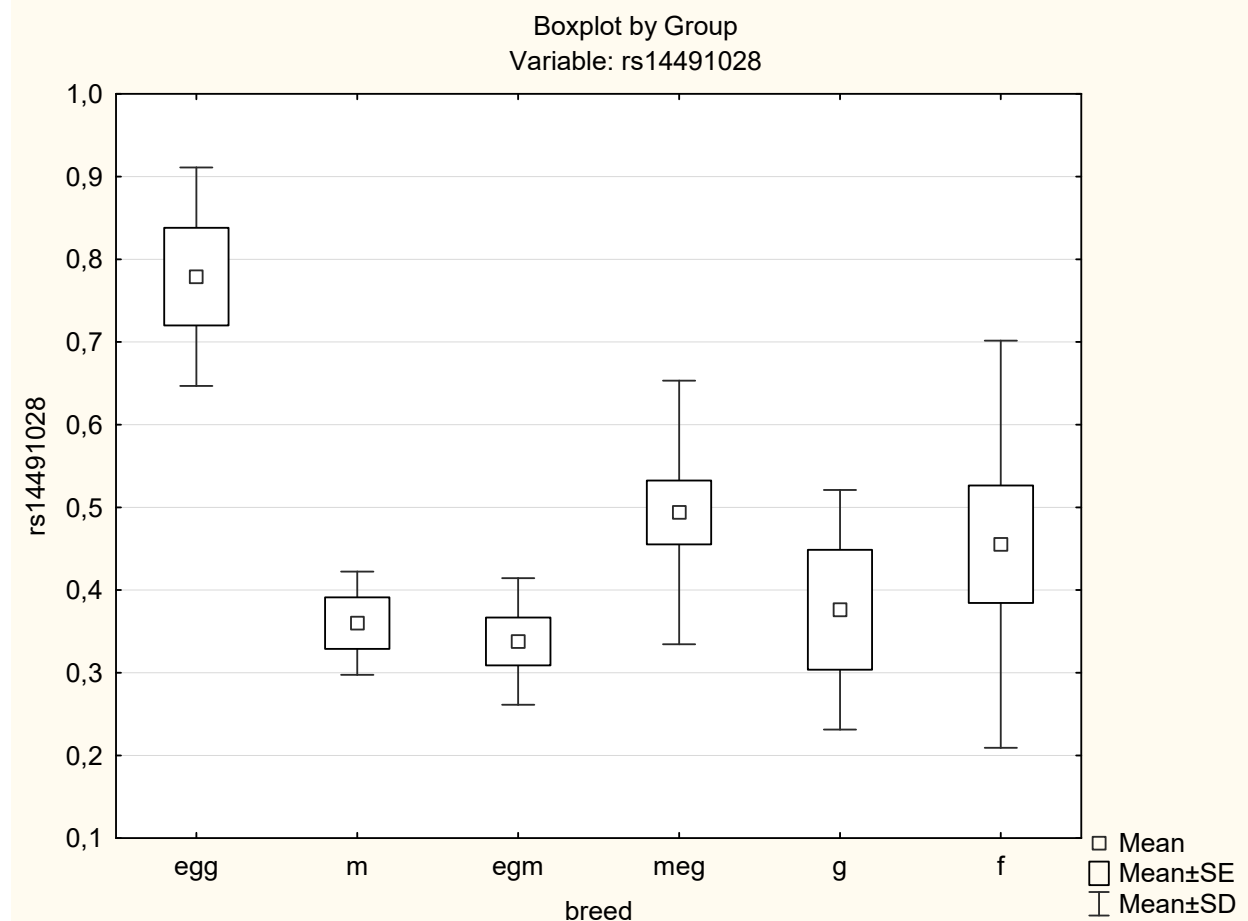

| Groups compared at<br>GGalGA265969 | meat-type | dual purpose | egg-meat | meat-egg | game  | fancy | p-value |
|------------------------------------|-----------|--------------|----------|----------|-------|-------|---------|
| egg-type                           | 0.014     | 0.312        | 0.371    | 0.346    | 0.902 | 0.029 | 0.0247  |
| meat-type                          |           | 0.048        | 0.087    | 0.059    | 0.110 | 0.327 |         |
| dual purpose:                      |           |              |          |          | 0.411 | 0.008 |         |
| egg-meat                           |           |              |          | 0.633    | 0.449 | 0.074 |         |
| meat-egg                           |           |              |          |          | 0.446 | 0.010 |         |
| game                               |           |              |          |          |       | 0.058 |         |

| Groups compared at<br>GGalGA265966 | meat-type | dual purpose | egg-meat | meat-egg | game  | fancy | p-value |
|------------------------------------|-----------|--------------|----------|----------|-------|-------|---------|
| egg-type                           | 0.049     | 0.0242       | 0.018    | 0.054    | 0.085 | 0.224 | 0.1325  |
| meat-type                          |           | 0.843        | 0.256    | 0.787    | 1.00  | 0.430 |         |
| dual purpose:                      |           |              |          |          | 0.693 | 0.275 |         |
| egg-meat                           |           |              |          | 0.098    | 0.130 | 0.139 |         |
| meat-egg                           |           |              |          |          | 0.857 | 0.505 |         |
| game                               |           |              |          |          |       | 0.627 |         |

| Groups compared at<br>rs15619223 | meat-type | dual purpose | egg-meat | meat-egg | game  | fancy | p-value |
|----------------------------------|-----------|--------------|----------|----------|-------|-------|---------|
| egg-type                         | 0.012     | 0.001        | 0.007    | 0.002    | 0.014 | 0.026 | 0.0011  |
| meat-type                        |           | 0.029        | 0.066    | 0.034    | 0.139 | 0.012 |         |
| dual purpose:                    |           |              |          |          | 0.392 | 0.027 |         |
| egg-meat                         |           |              |          | 0.898    | 0.570 | 0.098 |         |
| meat-egg                         |           |              |          |          | 0.370 | 0.041 |         |
| game                             |           |              |          |          |       | 0.052 |         |

| Groups compared at<br>rs14491017 | meat-type | dual purpose | egg-meat | meat-egg | game  | fancy | p-value |
|----------------------------------|-----------|--------------|----------|----------|-------|-------|---------|
| egg-type                         | 0.013     | 0.002        | 0.007    | 0.003    | 0.026 | 0.090 | 0.0028  |
| meat-type                        |           | 0.003        | 0.014    | 0.005    | 0.191 | 0.211 |         |
| dual purpose:                    |           |              |          |          | 0.693 | 0.126 |         |
| egg-meat                         |           |              |          | 0.119    | 0.850 | 0.138 |         |
| meat-egg                         |           |              |          |          | 0.635 | 0.214 |         |
| game                             |           |              |          |          |       | 0.362 |         |

| Groups compared at<br>rs14491028 | meat-type | dual purpose | egg-meat | meat-egg | game  | fancy | p-value |
|----------------------------------|-----------|--------------|----------|----------|-------|-------|---------|
| egg-type                         | 0.014     | 0.001        | 0.004    | 0.002    | 0.014 | 0.023 | 0.0047  |
| meat-type                        |           | 0.263        | 0.570    | 0.072    | 0.663 | 0.301 |         |
| dual purpose:                    |           |              |          |          | 0.374 | 0.986 |         |
| egg-meat                         |           |              |          | 0.017    | 0.570 | 0.175 |         |
| meat-egg                         |           |              |          |          | 0.138 | 0.464 |         |
| game                             |           |              |          |          |       | 0.503 |         |

Supporting Info S3 (f-j): Boxplots and significance of differences in allele frequencies for the studied five SNPs at the locus *NCAPG-LCORL* as assessed for chicken breed groups according to clustering by phenotypic traits (PCM): egg, egg-meat, meat-egg, meat, game, fancy, and Bantam.

f: GGaluga265969

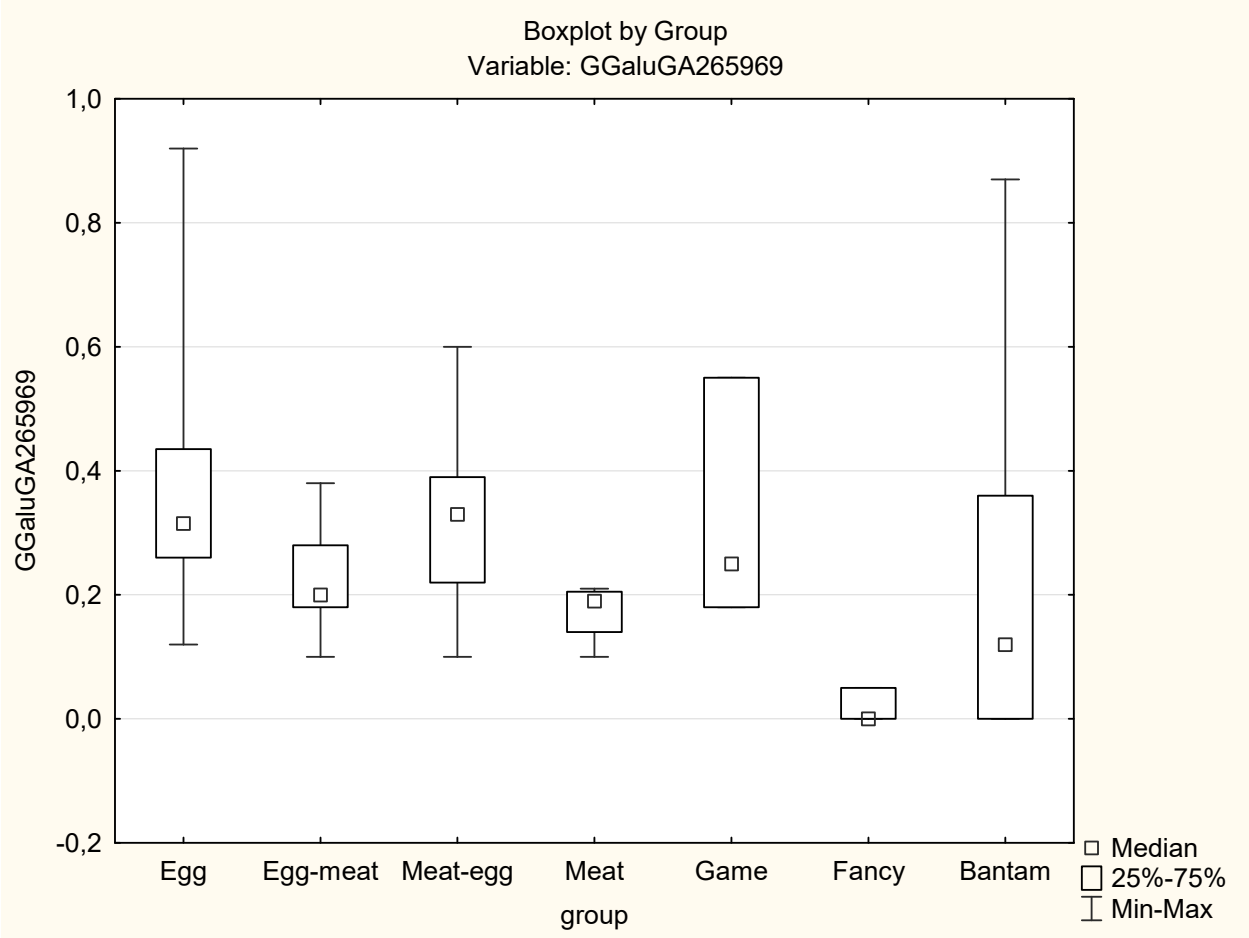

g: GGaluga265966

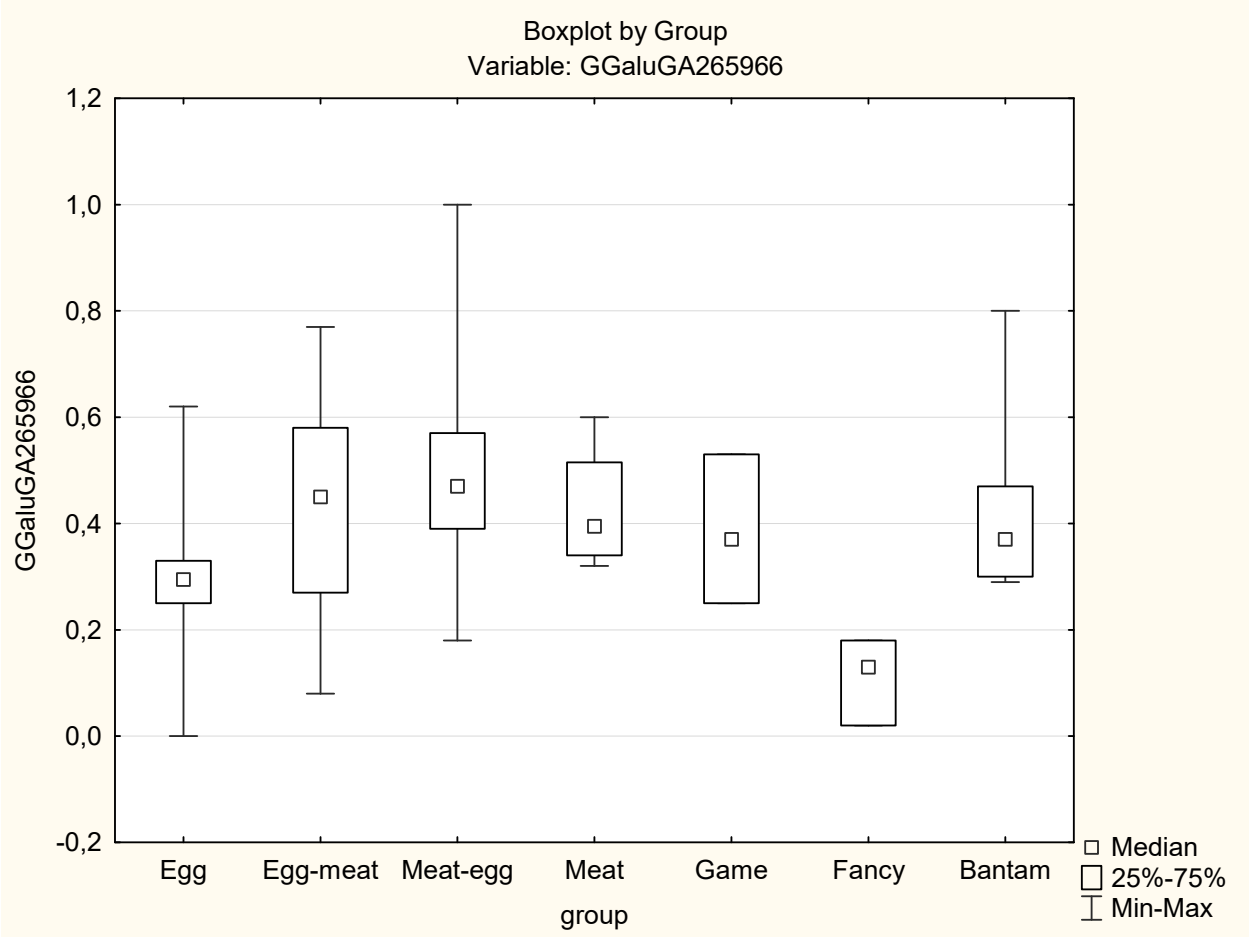

h: rs15619223

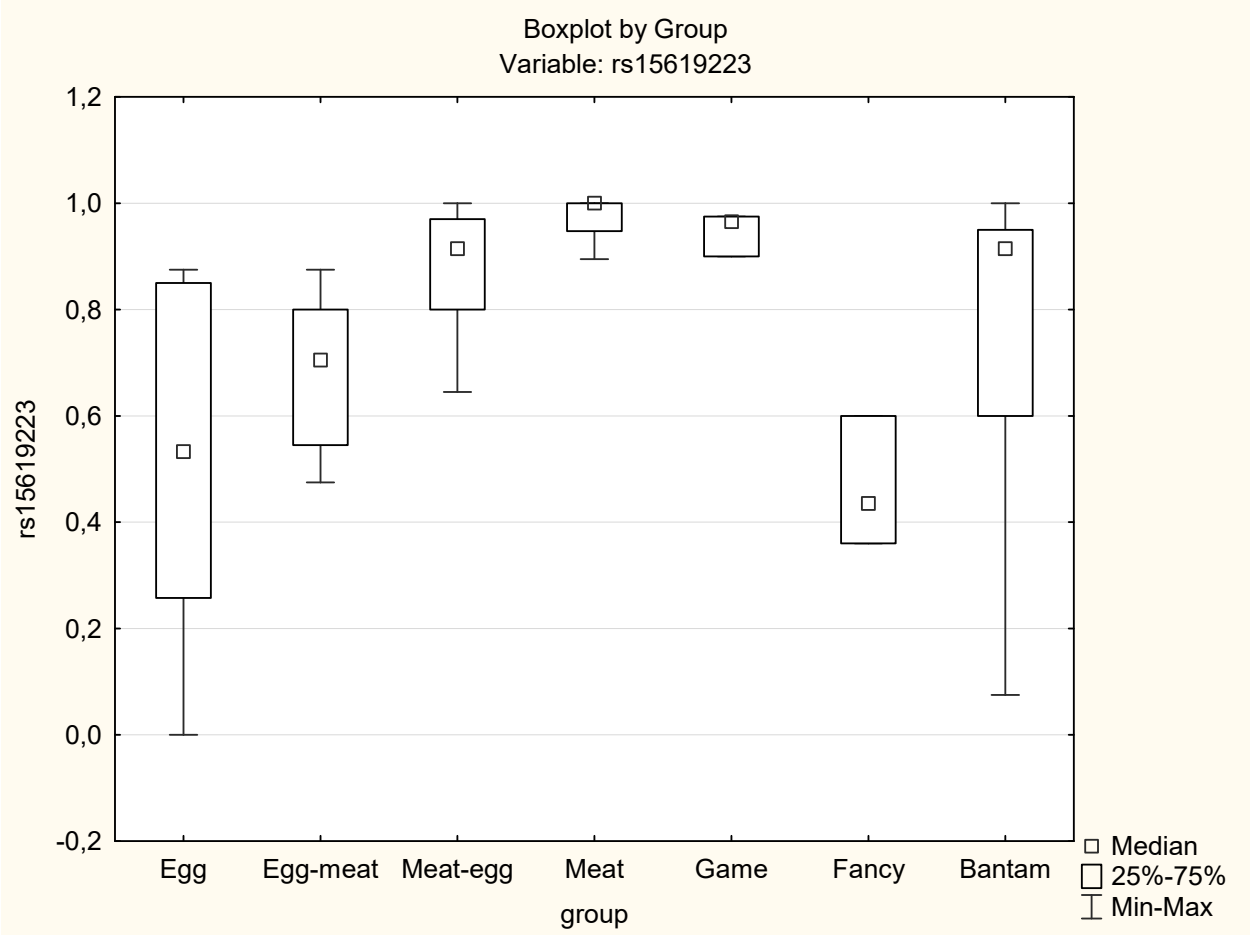

i: rs14491017

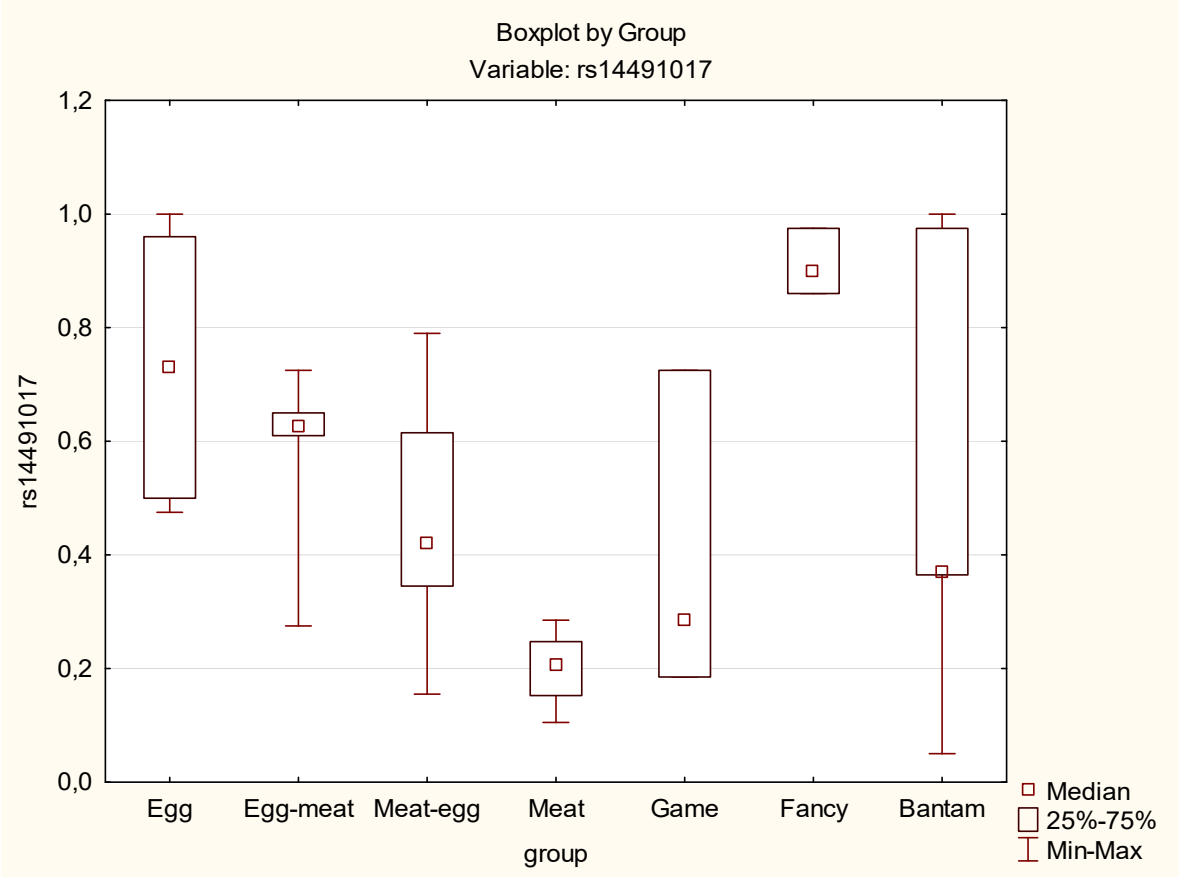

j: rs14491028

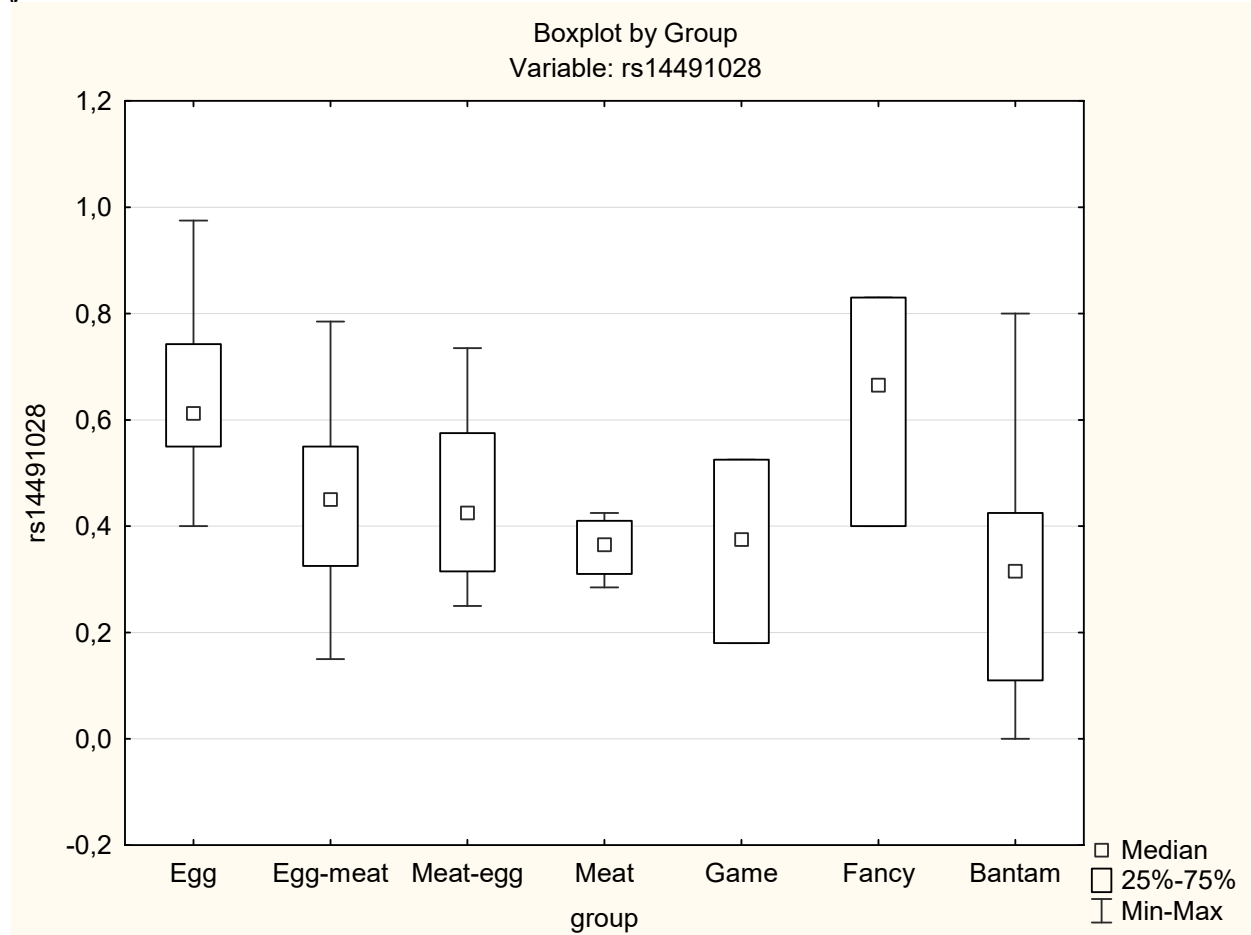

| Groups compared at GGaluga265969 | Egg-meat | Meat-egg | Meat   | Game   | Fancy  | Bantam | p-value |
|----------------------------------|----------|----------|--------|--------|--------|--------|---------|
| Egg                              | 0.1017   | 0.8841   | 0.0272 | 0.6090 | 0.0141 | 0.2709 | 0.029   |
| Egg-meat                         |          | 0.1056   | 0.3505 | 0.4580 | 0.0122 | 0.5476 |         |
| Meat-egg                         |          |          | 0.0486 | 0.9156 | 0.0069 | 0.2723 |         |
| Meat                             |          |          |        | 0.2118 | 0.0323 | 0.8057 |         |
| Game                             |          |          |        |        | 0.0463 | 0.4534 |         |
| Fancy                            |          |          |        |        |        | 0.2662 |         |

| Groups compared at GGaluga265966 | Egg-meat | Meat-egg | Meat   | Game   | Fancy  | Bantam | p-value |
|----------------------------------|----------|----------|--------|--------|--------|--------|---------|
| Egg                              | 0.3108   | 0.0332   | 0.1048 | 0.4088 | 0.0650 | 0.1421 | 0.066   |
| Egg-meat                         |          | 0.6465   | 0.9384 | 0.7815 | 0.0335 | 0.8415 |         |
| Meat-egg                         |          |          | 0.5597 | 0.3674 | 0.0080 | 0.5040 |         |
| Meat                             |          |          |        | 0.7237 | 0.0339 | 0.8065 |         |
| Game                             |          |          |        |        | 0.0495 | 0.7642 |         |
| Fancy                            |          |          |        |        |        | 0.0253 |         |

| Groups compared at rs15619223 | Egg-meat | Meat-egg | Meat   | Game   | Fancy  | Bantam | p-value |
|-------------------------------|----------|----------|--------|--------|--------|--------|---------|
| Egg                           | 0.4688   | 0.0043   | 0.0061 | 0.0141 | 0.8379 | 0.1427 | 0.0004  |
| Egg-meat                      |          | 0.0017   | 0.0052 | 0.0124 | 0.0785 | 0.2566 |         |
| Meat-egg                      |          |          | 0.0697 | 0.3959 | 0.0068 | 0.5292 |         |
| Meat                          |          |          |        | 0.2710 | 0.0277 | 0.1594 |         |
| Game                          |          |          |        |        | 0.0495 | 0.4561 |         |
| Fancy                         |          |          |        |        |        | 0.2303 |         |

| Groups compared at rs14491017 | Egg-meat | Meat-egg | Meat   | Game   | Fancy  | Bantam | p-value |
|-------------------------------|----------|----------|--------|--------|--------|--------|---------|
| Egg                           | 0.1622   | 0.0103   | 0.0064 | 0.0806 | 0.4121 | 0.3022 | 0.003   |
| Egg-meat                      |          | 0.1454   | 0.0087 | 0.4588 | 0.0126 | 0.9468 |         |
| Meat-egg                      |          |          | 0.0072 | 0.4914 | 0.0070 | 0.9064 |         |
| Meat                          |          |          |        | 0.3725 | 0.0339 | 0.1416 |         |
| Game                          |          |          |        |        | 0.0495 | 0.4561 |         |

|       |  |  |  |  |  |        |  |
|-------|--|--|--|--|--|--------|--|
| Fancy |  |  |  |  |  | 0.5486 |  |
|-------|--|--|--|--|--|--------|--|

| Groups compared at<br>rs14491028 | Egg-meat | Meat-egg | Meat   | Game   | Fancy  | Bantam | p-value |
|----------------------------------|----------|----------|--------|--------|--------|--------|---------|
| Egg                              | 0.0483   | 0.0228   | 0.0107 | 0.0313 | 0.8372 | 0.0567 | 0.056   |
| Egg-meat                         |          | 0.9141   | 0.2170 | 0.4588 | 0.2294 | 0.2571 |         |
| Meat-egg                         |          |          | 0.3467 | 0.3404 | 0.1529 | 0.3270 |         |
| Meat                             |          |          |        | 1.0000 | 0.0771 | 0.7122 |         |
| Game                             |          |          |        |        | 0.1266 | 0.6547 |         |
| Fancy                            |          |          |        |        |        | 0.1797 |         |



**Supporting Info S3 (k-o):** Boxplots and significance of differences in allele frequencies for the studied five SNPs at the locus *NCAPG-LCORL* as assessed for chicken breed groups according to clustering by SNP genotypes (GCM1): ETB/Ia, ETB/Ib, DPB/IIa, DPB/IIb, and MTB/III.

**k:** GGaluga265969

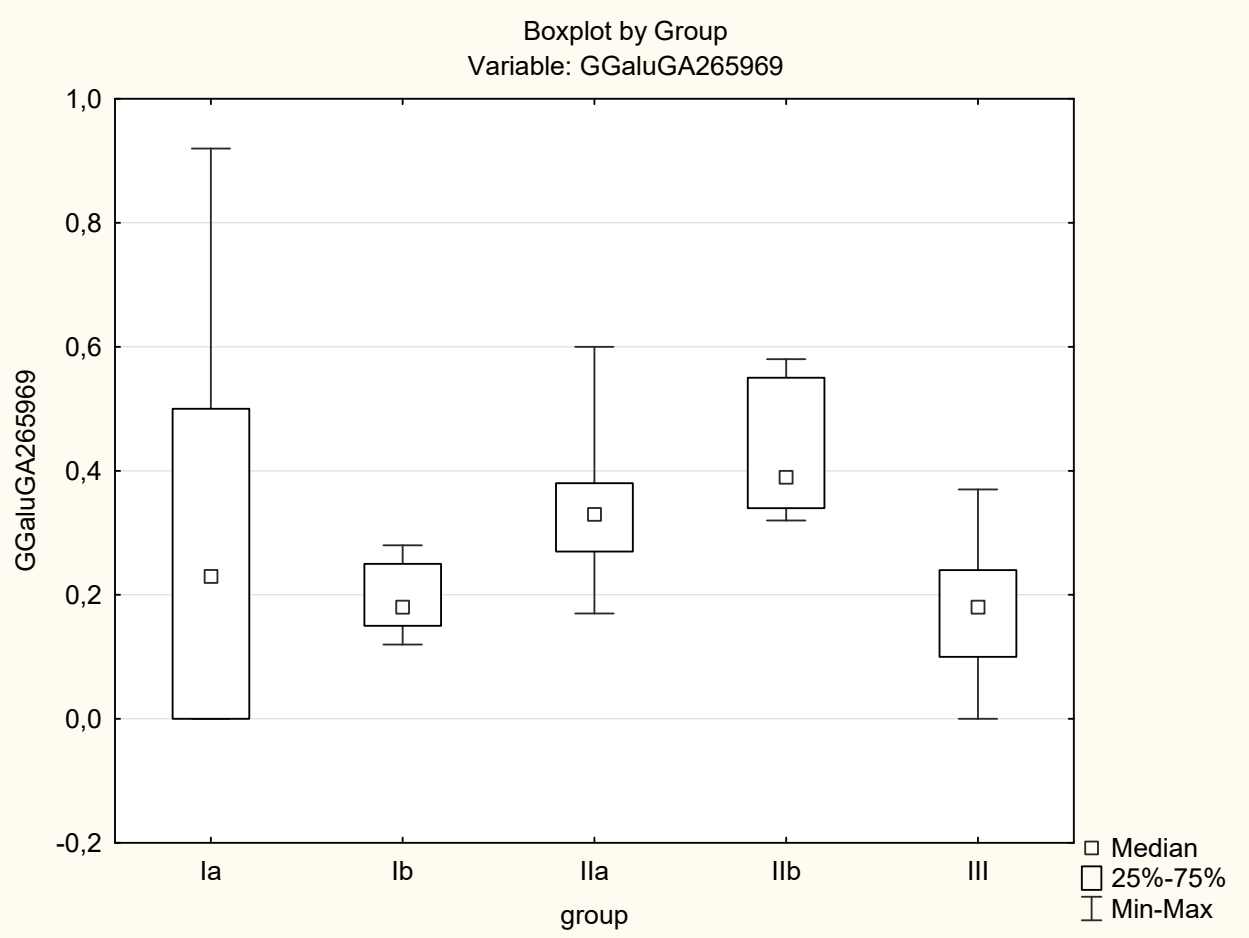

**l:** GGaluga265966

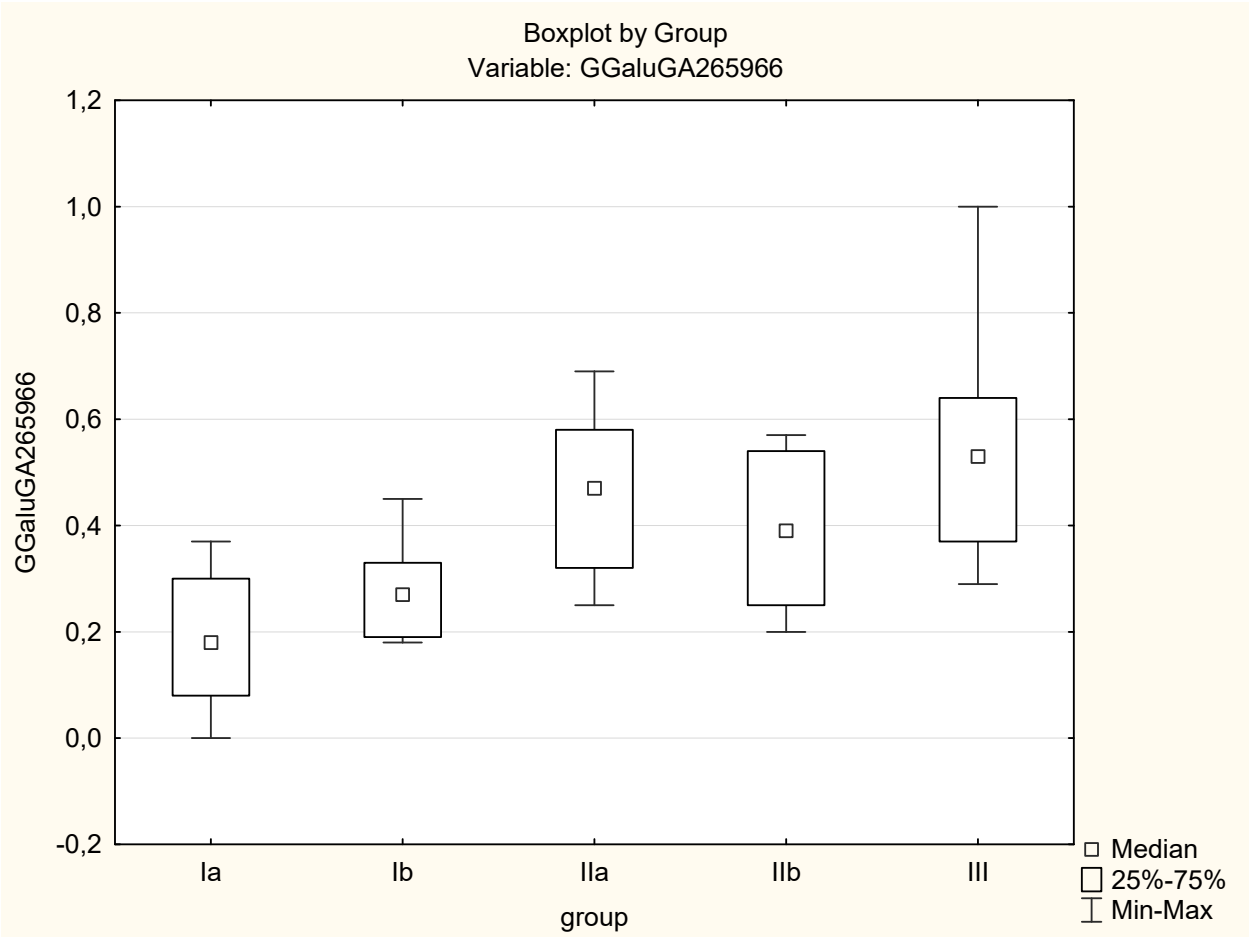

m: rs15619223

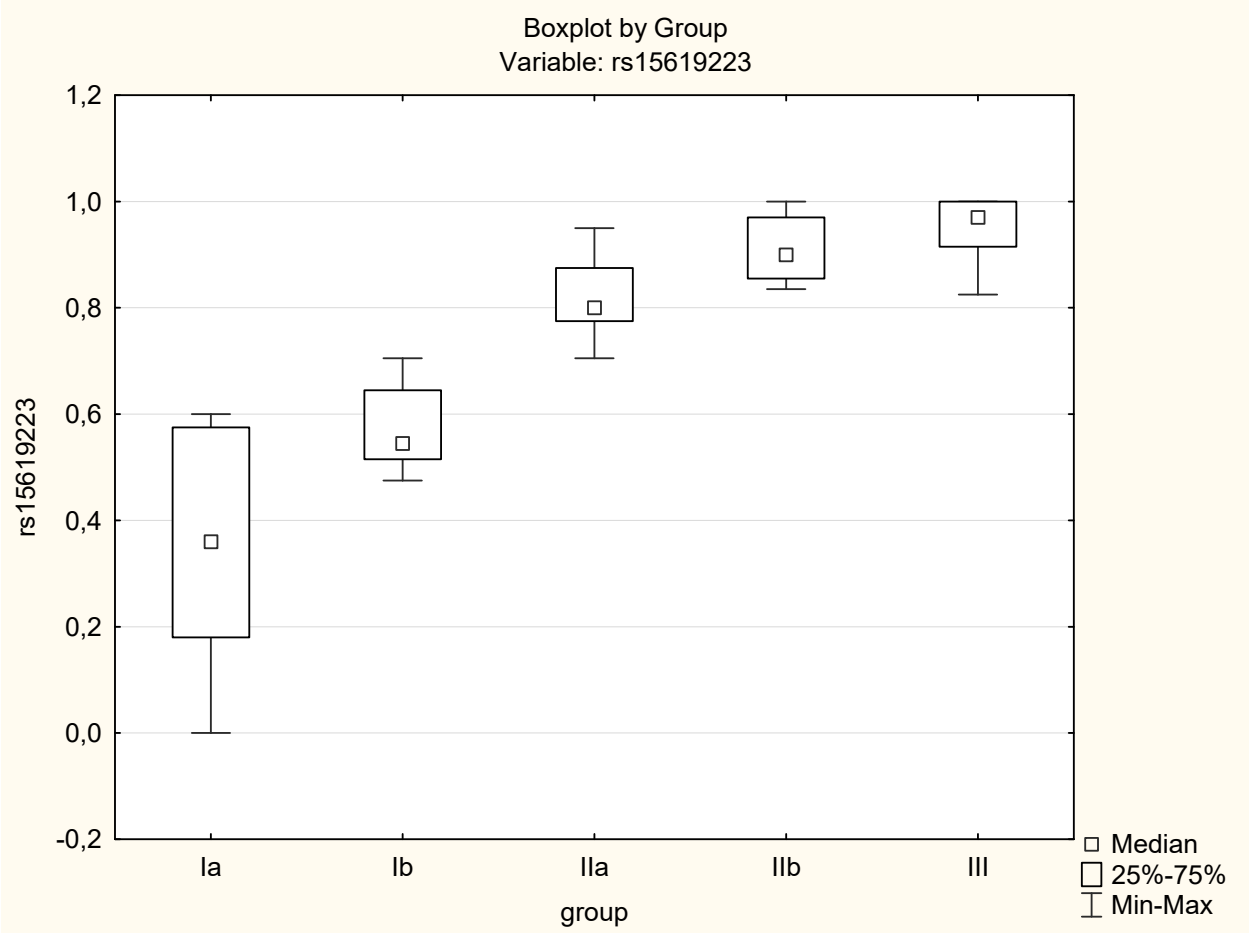

n: rs14491017

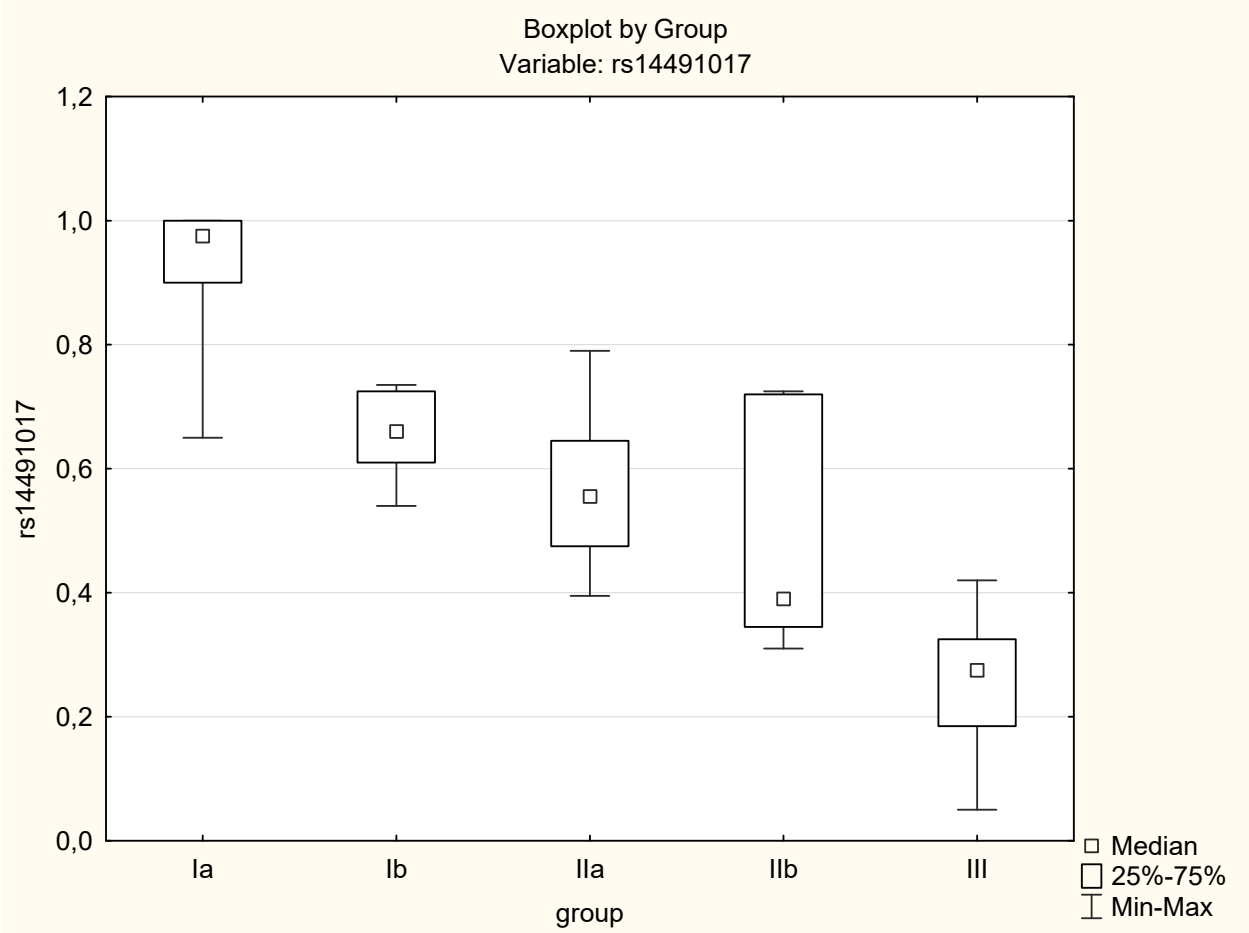

o: rs14491028

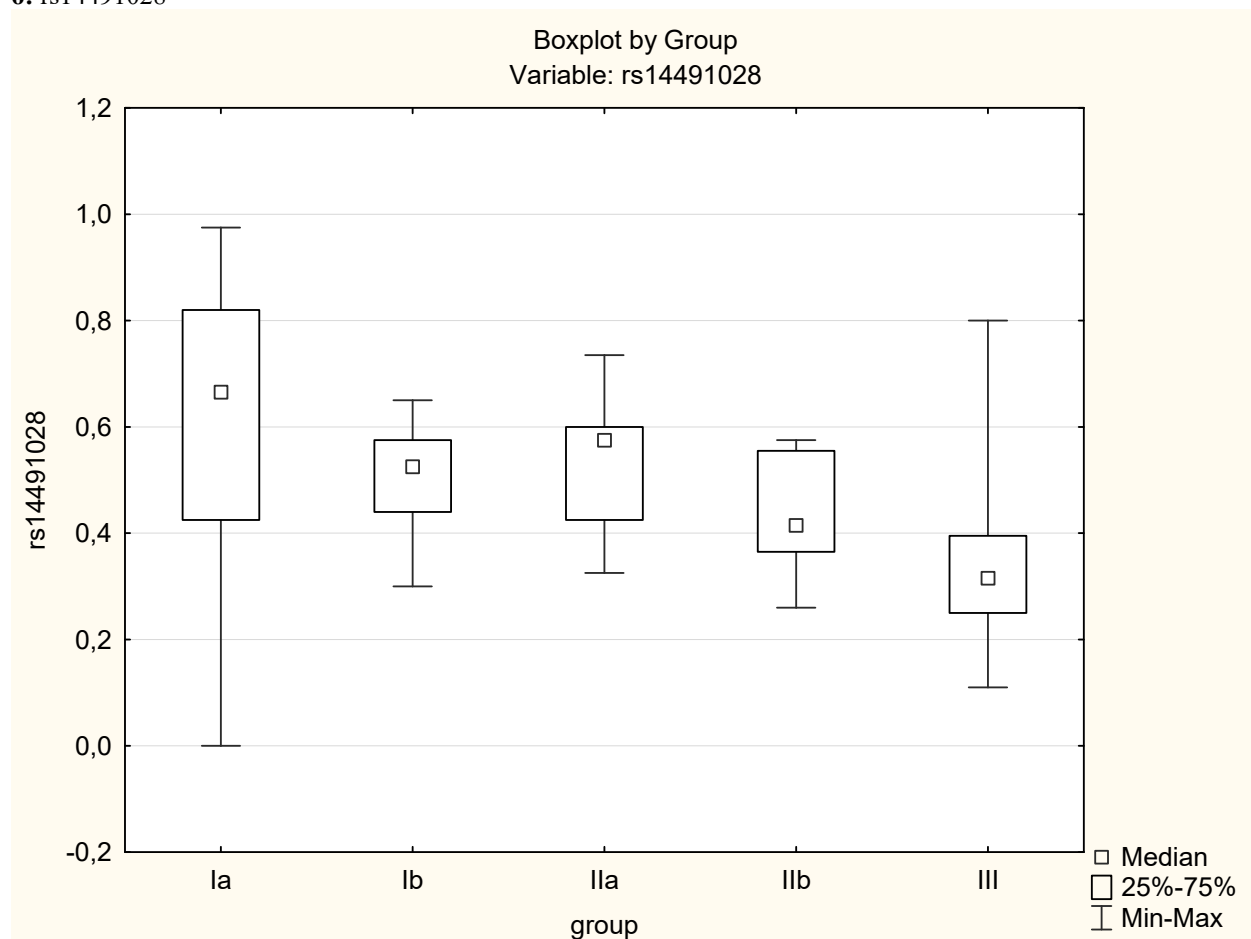

| Groups compared at<br>GGaluga265969 | ETB/Ib | DPB/IIa | DPB/IIb | MTB/III | p-value |
|-------------------------------------|--------|---------|---------|---------|---------|
| ETB/Ia                              | 0.8734 | 0.4240  | 0.2221  | 0.8108  | 0.0025  |
| ETB/Ib                              |        | 0.0057  | 0.0017  | 0.6705  |         |
| DPB/IIa                             |        |         | 0.1235  | 0.0022  |         |
| DPB/IIb                             |        |         |         | 0.0009  |         |

| Groups compared at<br>GGaluga265966 | ETB/Ib | DPB/IIa | DPB/IIb | MTB/III | p-value |
|-------------------------------------|--------|---------|---------|---------|---------|
| ETB/Ia                              | 0.2030 | 0.0016  | 0.0261  | 0.0003  | 0.0002  |
| ETB/Ib                              |        | 0.0124  | 0.1594  | 0.0024  |         |
| DPB/IIa                             |        |         | 0.2756  | 0.3495  |         |
| DPB/IIb                             |        |         |         | 0.0840  |         |

| Groups compared at<br>rs15619223 | ETB/Ib | DPB/IIa | DPB/IIb | MTB/III | p-value |
|----------------------------------|--------|---------|---------|---------|---------|
| ETB/Ia                           | 0.0805 | 0.0002  | 0.0008  | 0.0000  | 0.0000  |
| ETB/Ib                           |        | 0.0006  | 0.0017  | 0.0002  |         |
| DPB/IIa                          |        |         | 0.0162  | 0.0003  |         |
| DPB/IIb                          |        |         |         | 0.1730  |         |

| Groups compared at<br>rs14491017 | ETB/Ib | DPB/IIa | DPB/IIb | MTB/III | p-value |
|----------------------------------|--------|---------|---------|---------|---------|
| ETB/Ia                           | 0.0035 | 0.0003  | 0.0017  | 0.0001  | 0.0000  |
| ETB/Ib                           |        | 0.0692  | 0.0832  | 0.0002  |         |
| DPB/IIa                          |        |         | 0.2566  | 0.0000  |         |
| DPB/IIb                          |        |         |         | 0.0022  |         |

| Groups compared at<br>rs14491028 | ETB/Ib | DPB/IIa | DPB/IIb | MTB/III | p-value |
|----------------------------------|--------|---------|---------|---------|---------|
| ETB/Ia                           | 0.1855 | 0.2093  | 0.0638  | 0.0087  | 0.0019  |
| ETB/Ib                           |        | 0.4138  | 0.3368  | 0.0091  |         |
| DPB/IIa                          |        |         | 0.0694  | 0.0011  |         |
| DPB/IIb                          |        |         |         | 0.0667  |         |
