# Supplementary material for: Evolutionary Subdivision of Domestic Chickens: Implications for Local Breeds as Assessed by Phenotype and Genotype in Comparison to Commercial and Fancy Breeds
Source: MDPI journal article supplement (doi:10.3390/agriculture11100914), 2021-09-24
Supplement: s1 [file s1]

**Supporting Info S2 (a–e): Significance levels of differences in allele frequencies for the five SNPs with the meat-egg and egg-meat subgroups of chickens combined into one dual purpose group within TCM and using the Kruskal –Wallis test for ANOVA by ranks.** Groups: egg, egg-type; m, meat-type; dpb, dual purpose breeds; b, Bantam; and d, fancy (decorative).

**a: GGaluGA265969**

|                                                                                            |      |                                        |                 |              |
|--------------------------------------------------------------------------------------------|------|----------------------------------------|-----------------|--------------|
| Kruskal-Wallis ANOVA by Ranks; GGaluGA265969 (подсчет аллели - комбинир группы Statistica) |      | Independent (grouping) variable: breed |                 |              |
| Kruskal-Wallis test: H ( 1, N= 9) =6,000000 p =,0143                                       |      |                                        |                 |              |
| Depend.:<br>GGaluGA265969                                                                  | Code | Valid<br>N                             | Sum of<br>Ranks | Mean<br>Rank |
| egg                                                                                        | 101  | 5                                      | 35,00000        | 7,000000     |
| m                                                                                          | 102  | 4                                      | 10,00000        | 2,500000     |
| Kruskal-Wallis ANOVA by Ranks; GGaluGA265969 (подсчет аллели - комбинир группы Statistica) |      | Independent (grouping) variable: breed |                 |              |
| Kruskal-Wallis test: H ( 1, N= 29) =1,021840 p =,3121                                      |      |                                        |                 |              |
| Depend.:<br>GGaluGA265969                                                                  | Code | Valid<br>N                             | Sum of<br>Ranks | Mean<br>Rank |
| egg                                                                                        | 101  | 5                                      | 92,5000         | 18,50000     |
| dpb                                                                                        | 103  | 24                                     | 342,5000        | 14,27083     |
| Kruskal-Wallis ANOVA by Ranks; GGaluGA265969 (подсчет аллели - комбинир группы Statistica) |      | Independent (grouping) variable: breed |                 |              |
| Kruskal-Wallis test: H ( 1, N= 9) =,0151261 p =,9021                                       |      |                                        |                 |              |
| Depend.:<br>GGaluGA265969                                                                  | Code | Valid<br>N                             | Sum of<br>Ranks | Mean<br>Rank |
| egg                                                                                        | 101  | 5                                      | 25,50000        | 5,100000     |
| b                                                                                          | 104  | 4                                      | 19,50000        | 4,875000     |
| Kruskal-Wallis ANOVA by Ranks; GGaluGA265969 (подсчет аллели - комбинир группы Statistica) |      | Independent (grouping) variable: breed |                 |              |
| Kruskal-Wallis test: H ( 1, N= 17) =4,733251 p =,0296                                      |      |                                        |                 |              |
| Depend.:<br>GGaluGA265969                                                                  | Code | Valid<br>N                             | Sum of<br>Ranks | Mean<br>Rank |
| egg                                                                                        | 101  | 5                                      | 65,50000        | 13,10000     |
| d                                                                                          | 105  | 12                                     | 87,50000        | 7,29167      |
| Kruskal-Wallis ANOVA by Ranks; GGaluGA265969 (подсчет аллели - комбинир группы Statistica) |      | Independent (grouping) variable: breed |                 |              |
| Kruskal-Wallis test: H ( 1, N= 28) =3,887822 p =,0486                                      |      |                                        |                 |              |
| Depend.:<br>GGaluGA265969                                                                  | Code | Valid<br>N                             | Sum of<br>Ranks | Mean<br>Rank |
| m                                                                                          | 102  | 4                                      | 28,0000         | 7,00000      |
| dpb                                                                                        | 103  | 24                                     | 378,0000        | 15,75000     |
| Kruskal-Wallis ANOVA by Ranks; GGaluGA265969 (подсчет аллели - комбинир группы Statistica) |      | Independent (grouping) variable: breed |                 |              |
| Kruskal-Wallis test: H ( 1, N= 8) =2,551205 p =,1102                                       |      |                                        |                 |              |
| Depend.:<br>GGaluGA265969                                                                  | Code | Valid<br>N                             | Sum of<br>Ranks | Mean<br>Rank |
| m                                                                                          | 102  | 4                                      | 12,50000        | 3,125000     |
| b                                                                                          | 104  | 4                                      | 23,50000        | 5,875000     |
| Kruskal-Wallis ANOVA by Ranks; GGaluGA265969 (подсчет аллели - комбинир группы Statistica) |      | Independent (grouping) variable: breed |                 |              |
| Kruskal-Wallis test: H ( 1, N= 16) =,9580838 p =,3277                                      |      |                                        |                 |              |
| Depend.:<br>GGaluGA265969                                                                  | Code | Valid<br>N                             | Sum of<br>Ranks | Mean<br>Rank |
| m                                                                                          | 102  | 4                                      | 42,00000        | 10,50000     |
| d                                                                                          | 105  | 12                                     | 94,00000        | 7,83333      |

|                           |                                                                                                                                                                                               |            |                 |              |
|---------------------------|-----------------------------------------------------------------------------------------------------------------------------------------------------------------------------------------------|------------|-----------------|--------------|
| Depend.:<br>GGaluGA265969 | Kruskal-Wallis ANOVA by Ranks; GGaluGA265969 (подсчет аллели - комбинир группы Statistica)<br>Independent (grouping) variable: breed<br>Kruskal-Wallis test: H ( 1, N= 28) =,6742295 p =,4116 |            |                 |              |
|                           | Code                                                                                                                                                                                          | Valid<br>N | Sum of<br>Ranks | Mean<br>Rank |
|                           | dpb                                                                                                                                                                                           | 103        | 24              | 335,5000     |
| b                         | 104                                                                                                                                                                                           | 4          | 70,5000         | 13,97917     |
|                           |                                                                                                                                                                                               |            |                 | 17,62500     |

|                           |                                                                                                                                                                                               |            |                 |              |
|---------------------------|-----------------------------------------------------------------------------------------------------------------------------------------------------------------------------------------------|------------|-----------------|--------------|
| Depend.:<br>GGaluGA265969 | Kruskal-Wallis ANOVA by Ranks; GGaluGA265969 (подсчет аллели - комбинир группы Statistica)<br>Independent (grouping) variable: breed<br>Kruskal-Wallis test: H ( 1, N= 36) =6,955584 p =,0084 |            |                 |              |
|                           | Code                                                                                                                                                                                          | Valid<br>N | Sum of<br>Ranks | Mean<br>Rank |
|                           | dpb                                                                                                                                                                                           | 103        | 24              | 522,5000     |
| d                         | 105                                                                                                                                                                                           | 12         | 143,5000        | 21,77083     |
|                           |                                                                                                                                                                                               |            |                 | 11,95833     |

|                           |                                                                                                                                                                                               |            |                 |              |
|---------------------------|-----------------------------------------------------------------------------------------------------------------------------------------------------------------------------------------------|------------|-----------------|--------------|
| Depend.:<br>GGaluGA265969 | Kruskal-Wallis ANOVA by Ranks; GGaluGA265969 (подсчет аллели - комбинир группы Statistica)<br>Independent (grouping) variable: breed<br>Kruskal-Wallis test: H ( 1, N= 16) =3,591181 p =,0581 |            |                 |              |
|                           | Code                                                                                                                                                                                          | Valid<br>N | Sum of<br>Ranks | Mean<br>Rank |
|                           | d                                                                                                                                                                                             | 105        | 12              | 86,50000     |
| b                         | 104                                                                                                                                                                                           | 4          | 49,50000        | 7,20833      |
|                           |                                                                                                                                                                                               |            |                 | 12,37500     |

|                           |                                                                                                                                                                                               |            |                 |              |
|---------------------------|-----------------------------------------------------------------------------------------------------------------------------------------------------------------------------------------------|------------|-----------------|--------------|
| Depend.:<br>GGaluGA265969 | Kruskal-Wallis ANOVA by Ranks; GGaluGA265969 (подсчет аллели - комбинир группы Statistica)<br>Independent (grouping) variable: breed<br>Kruskal-Wallis test: H ( 4, N= 49) =12,76570 p =,0125 |            |                 |              |
|                           | Code                                                                                                                                                                                          | Valid<br>N | Sum of<br>Ranks | Mean<br>Rank |
|                           | egg                                                                                                                                                                                           | 101        | 5               | 173,5000     |
| m                         | 102                                                                                                                                                                                           | 4          | 62,5000         | 34,70000     |
| dpb                       | 103                                                                                                                                                                                           | 24         | 678,5000        | 15,62500     |
| b                         | 104                                                                                                                                                                                           | 4          | 133,0000        | 28,27083     |
| d                         | 105                                                                                                                                                                                           | 12         | 177,5000        | 33,25000     |
|                           |                                                                                                                                                                                               |            |                 | 14,79167     |

|               |     |       |       |       |       |
|---------------|-----|-------|-------|-------|-------|
| GGaluGA265969 | egg | m     | dpb   | b     | d     |
| egg           |     | 0.014 | 0.312 | 0.902 | 0.029 |
| m             |     |       | 0.048 | 0.110 | 0.327 |
| dpb           |     |       |       | 0.411 | 0.008 |
| b             |     |       |       |       | 0.058 |

b: GGaluGA265966

|                           |                                                                                                                                                                                             |            |                 |              |
|---------------------------|---------------------------------------------------------------------------------------------------------------------------------------------------------------------------------------------|------------|-----------------|--------------|
| Depend.:<br>GGaluGA265966 | Kruskal-Wallis ANOVA by Ranks; GGaluGA265966 (подсчет аллели - комбинир группы Statistic<br>Independent (grouping) variable: breed<br>Kruskal-Wallis test: H ( 4, N= 49) =6,132758 p =,1895 |            |                 |              |
|                           | Code                                                                                                                                                                                        | Valid<br>N | Sum of<br>Ranks | Mean<br>Rank |
|                           | egg                                                                                                                                                                                         | 101        | 5               | 59,5000      |
|                           | m                                                                                                                                                                                           | 102        | 4               | 111,5000     |
|                           | dpb                                                                                                                                                                                         | 103        | 24              | 680,5000     |
|                           | b                                                                                                                                                                                           | 104        | 4               | 105,0000     |
|                           | d                                                                                                                                                                                           | 105        | 12              | 268,5000     |
| Depend.:<br>GGaluGA265966 | Kruskal-Wallis ANOVA by Ranks; GGaluGA265966 (подсчет аллели - комбинир группы Statistic<br>Independent (grouping) variable: breed<br>Kruskal-Wallis test: H ( 1, N= 9) =3,872269 p =,0491  |            |                 |              |
|                           | Code                                                                                                                                                                                        | Valid<br>N | Sum of<br>Ranks | Mean<br>Rank |
|                           | egg                                                                                                                                                                                         | 101        | 5               | 17,00000     |
| Depend.:<br>GGaluGA265966 | m                                                                                                                                                                                           | 102        | 4               | 28,00000     |
|                           |                                                                                                                                                                                             |            |                 |              |
| Depend.:<br>GGaluGA265966 | Kruskal-Wallis ANOVA by Ranks; GGaluGA265966 (подсчет аллели - комбинир группы Statistic<br>Independent (grouping) variable: breed<br>Kruskal-Wallis test: H ( 1, N= 9) =2,964706 p =,0851  |            |                 |              |
|                           | Code                                                                                                                                                                                        | Valid<br>N | Sum of<br>Ranks | Mean<br>Rank |
|                           | egg                                                                                                                                                                                         | 101        | 5               | 18,00000     |
|                           | b                                                                                                                                                                                           | 104        | 4               | 27,00000     |
| Depend.:<br>GGaluGA265966 | Kruskal-Wallis ANOVA by Ranks; GGaluGA265966 (подсчет аллели - комбинир группы Statistic<br>Independent (grouping) variable: breed<br>Kruskal-Wallis test: H ( 1, N= 17) =1,473055 p =,2249 |            |                 |              |
|                           | Code                                                                                                                                                                                        | Valid<br>N | Sum of<br>Ranks | Mean<br>Rank |
|                           | egg                                                                                                                                                                                         | 101        | 5               | 33,5000      |
| Depend.:<br>GGaluGA265966 | d                                                                                                                                                                                           | 105        | 12              | 119,5000     |
|                           |                                                                                                                                                                                             |            |                 |              |
| Depend.:<br>GGaluGA265966 | Kruskal-Wallis ANOVA by Ranks; GGaluGA265966 (подсчет аллели - комбинир группы Statistic<br>Independent (grouping) variable: breed<br>Kruskal-Wallis test: H ( 1, N= 28) =,0388782 p =,8437 |            |                 |              |
|                           | Code                                                                                                                                                                                        | Valid<br>N | Sum of<br>Ranks | Mean<br>Rank |
|                           | m                                                                                                                                                                                           | 102        | 4               | 55,0000      |
|                           | dpb                                                                                                                                                                                         | 103        | 24              | 351,0000     |
| Depend.:<br>GGaluGA265966 | Kruskal-Wallis ANOVA by Ranks; GGaluGA265966 (подсчет аллели - комбинир группы Statistic<br>Independent (grouping) variable: breed<br>Kruskal-Wallis test: H ( 1, N= 8) =0,000000 p =1,000  |            |                 |              |
|                           | Code                                                                                                                                                                                        | Valid<br>N | Sum of<br>Ranks | Mean<br>Rank |
|                           | m                                                                                                                                                                                           | 102        | 4               | 18,00000     |
|                           | b                                                                                                                                                                                           | 104        | 4               | 18,00000     |
| Depend.:<br>GGaluGA265966 | Kruskal-Wallis ANOVA by Ranks; GGaluGA265966 (подсчет аллели - комбинир группы Statistic<br>Independent (grouping) variable: breed<br>Kruskal-Wallis test: H ( 1, N= 16) =,6222386 p =,4302 |            |                 |              |
|                           | Code                                                                                                                                                                                        | Valid<br>N | Sum of<br>Ranks | Mean<br>Rank |
|                           | m                                                                                                                                                                                           | 102        | 4               | 40,50000     |
|                           | d                                                                                                                                                                                           | 105        | 12              | 95,50000     |
| Depend.:<br>GGaluGA265966 | Kruskal-Wallis ANOVA by Ranks; GGaluGA265966 (подсчет аллели - комбинир группы Statistic<br>Independent (grouping) variable: breed<br>Kruskal-Wallis test: H ( 1, N= 28) =,1556410 p =,6932 |            |                 |              |
|                           | Code                                                                                                                                                                                        | Valid<br>N | Sum of<br>Ranks | Mean<br>Rank |
|                           | dpb                                                                                                                                                                                         | 103        | 24              | 354,0000     |
| Depend.:<br>GGaluGA265966 | b                                                                                                                                                                                           | 104        | 4               | 52,0000      |
|                           |                                                                                                                                                                                             |            |                 |              |

|                           |                                                                                                                                                                                               |            |                 |              |
|---------------------------|-----------------------------------------------------------------------------------------------------------------------------------------------------------------------------------------------|------------|-----------------|--------------|
| Depend.:<br>GGaluGA265966 | Kruskal-Wallis ANOVA by Ranks; GGaluGA265966 (подсчет аллели - комбинир группы Statistica)<br>Independent (grouping) variable: breed<br>Kruskal-Wallis test: H ( 1, N= 36) =1,191618 p =,2750 |            |                 |              |
|                           | Code                                                                                                                                                                                          | Valid<br>N | Sum of<br>Ranks | Mean<br>Rank |
|                           | dpb                                                                                                                                                                                           | 103        | 24              | 476,5000     |
|                           | d                                                                                                                                                                                             | 105        | 12              | 189,5000     |
| Depend.:<br>GGaluGA265966 | Kruskal-Wallis ANOVA by Ranks; GGaluGA265966 (подсчет аллели - комбинир группы Statistica)<br>Independent (grouping) variable: breed<br>Kruskal-Wallis test: H ( 1, N= 16) =,2359882 p =,6271 |            |                 |              |
|                           | Code                                                                                                                                                                                          | Valid<br>N | Sum of<br>Ranks | Mean<br>Rank |
|                           | b                                                                                                                                                                                             | 104        | 4               | 38,00000     |
|                           | d                                                                                                                                                                                             | 105        | 12              | 98,00000     |

|               |     |       |       |       |       |
|---------------|-----|-------|-------|-------|-------|
| GGaluGA265966 | egg | m     | dpb   | b     | d     |
| egg           |     | 0.049 | 0.024 | 0.085 | 0.224 |
| m             |     |       | 0.843 | 1.00  | 0.430 |
| dpb           |     |       |       | 0.693 | 0.275 |
| b             |     |       |       |       | 0.627 |

c: rs15619223

|                                                                                                                                                                                           |      |            |                 |              |
|-------------------------------------------------------------------------------------------------------------------------------------------------------------------------------------------|------|------------|-----------------|--------------|
| Kruskal-Wallis ANOVA by Ranks; rs15619223 (подсчет аллели - комбинир группы Statistica<br>Independent (grouping) variable: breed<br>Kruskal-Wallis test: H ( 4, N= 49) =20,29185 p =,0004 |      |            |                 |              |
| Depend.:<br>rs15619223                                                                                                                                                                    | Code | Valid<br>N | Sum of<br>Ranks | Mean<br>Rank |
| egg                                                                                                                                                                                       | 101  | 5          | 28,0000         | 5,60000      |
| m                                                                                                                                                                                         | 102  | 4          | 168,5000        | 42,12500     |
| dpb                                                                                                                                                                                       | 103  | 24         | 675,5000        | 28,14583     |
| b                                                                                                                                                                                         | 104  | 4          | 134,0000        | 33,50000     |
| d                                                                                                                                                                                         | 105  | 12         | 219,0000        | 18,25000     |

|                                                                                                                                                                                          |      |            |                 |              |
|------------------------------------------------------------------------------------------------------------------------------------------------------------------------------------------|------|------------|-----------------|--------------|
| Kruskal-Wallis ANOVA by Ranks; rs15619223 (подсчет аллели - комбинир группы Statistica<br>Independent (grouping) variable: breed<br>Kruskal-Wallis test: H ( 1, N= 9) =6,206897 p =,0127 |      |            |                 |              |
| Depend.:<br>rs15619223                                                                                                                                                                   | Code | Valid<br>N | Sum of<br>Ranks | Mean<br>Rank |
| egg                                                                                                                                                                                      | 101  | 5          | 15,00000        | 3,000000     |
| m                                                                                                                                                                                        | 102  | 4          | 30,00000        | 7,500000     |

|                                                                                                                                                                                           |      |            |                 |              |
|-------------------------------------------------------------------------------------------------------------------------------------------------------------------------------------------|------|------------|-----------------|--------------|
| Kruskal-Wallis ANOVA by Ranks; rs15619223 (подсчет аллели - комбинир группы Statistica<br>Independent (grouping) variable: breed<br>Kruskal-Wallis test: H ( 1, N= 29) =10,47139 p =,0012 |      |            |                 |              |
| Depend.:<br>rs15619223                                                                                                                                                                    | Code | Valid<br>N | Sum of<br>Ranks | Mean<br>Rank |
| egg                                                                                                                                                                                       | 101  | 5          | 19,0000         | 3,80000      |
| dpb                                                                                                                                                                                       | 103  | 24         | 416,0000        | 17,33333     |

|                                                                                                                                                                                          |      |            |                 |              |
|------------------------------------------------------------------------------------------------------------------------------------------------------------------------------------------|------|------------|-----------------|--------------|
| Kruskal-Wallis ANOVA by Ranks; rs15619223 (подсчет аллели - комбинир группы Statistica<br>Independent (grouping) variable: breed<br>Kruskal-Wallis test: H ( 1, N= 9) =6,000000 p =,0143 |      |            |                 |              |
| Depend.:<br>rs15619223                                                                                                                                                                   | Code | Valid<br>N | Sum of<br>Ranks | Mean<br>Rank |
| egg                                                                                                                                                                                      | 101  | 5          | 15,00000        | 3,000000     |
| b                                                                                                                                                                                        | 104  | 4          | 30,00000        | 7,500000     |

|                                                                                                                                                                                           |      |            |                 |              |
|-------------------------------------------------------------------------------------------------------------------------------------------------------------------------------------------|------|------------|-----------------|--------------|
| Kruskal-Wallis ANOVA by Ranks; rs15619223 (подсчет аллели - комбинир группы Statistica<br>Independent (grouping) variable: breed<br>Kruskal-Wallis test: H ( 1, N= 17) =4,906012 p =,0268 |      |            |                 |              |
| Depend.:<br>rs15619223                                                                                                                                                                    | Code | Valid<br>N | Sum of<br>Ranks | Mean<br>Rank |
| egg                                                                                                                                                                                       | 101  | 5          | 24,0000         | 4,80000      |
| d                                                                                                                                                                                         | 105  | 12         | 129,0000        | 10,75000     |

|                                                                                                                                                                                           |      |            |                 |              |
|-------------------------------------------------------------------------------------------------------------------------------------------------------------------------------------------|------|------------|-----------------|--------------|
| Kruskal-Wallis ANOVA by Ranks; rs15619223 (подсчет аллели - комбинир группы Statistica<br>Independent (grouping) variable: breed<br>Kruskal-Wallis test: H ( 1, N= 28) =4,744606 p =,0294 |      |            |                 |              |
| Depend.:<br>rs15619223                                                                                                                                                                    | Code | Valid<br>N | Sum of<br>Ranks | Mean<br>Rank |
| m                                                                                                                                                                                         | 102  | 4          | 91,0000         | 22,75000     |
| dpb                                                                                                                                                                                       | 103  | 24         | 315,0000        | 13,12500     |

|                                                                                                                                                                                          |      |            |                 |              |
|------------------------------------------------------------------------------------------------------------------------------------------------------------------------------------------|------|------------|-----------------|--------------|
| Kruskal-Wallis ANOVA by Ranks; rs15619223 (подсчет аллели - комбинир группы Statistica<br>Independent (grouping) variable: breed<br>Kruskal-Wallis test: H ( 1, N= 8) =2,187500 p =,1391 |      |            |                 |              |
| Depend.:<br>rs15619223                                                                                                                                                                   | Code | Valid<br>N | Sum of<br>Ranks | Mean<br>Rank |
| m                                                                                                                                                                                        | 102  | 4          | 23,00000        | 5,750000     |
| b                                                                                                                                                                                        | 104  | 4          | 13,00000        | 3,250000     |

|                                                                                                                                                                                           |      |            |                 |              |
|-------------------------------------------------------------------------------------------------------------------------------------------------------------------------------------------|------|------------|-----------------|--------------|
| Kruskal-Wallis ANOVA by Ranks; rs15619223 (подсчет аллели - комбинир группы Statistica<br>Independent (grouping) variable: breed<br>Kruskal-Wallis test: H ( 1, N= 16) =6,281764 p =,0122 |      |            |                 |              |
| Depend.:<br>rs15619223                                                                                                                                                                    | Code | Valid<br>N | Sum of<br>Ranks | Mean<br>Rank |
| m                                                                                                                                                                                         | 102  | 4          | 54,50000        | 13,62500     |
| d                                                                                                                                                                                         | 105  | 12         | 81,50000        | 6,79167      |

|                        |                                                                                                                                                                                           |            |                 |              |
|------------------------|-------------------------------------------------------------------------------------------------------------------------------------------------------------------------------------------|------------|-----------------|--------------|
| Depend.:<br>rs15619223 | Kruskal-Wallis ANOVA by Ranks; rs15619223 (подсчет аллели - комбинир группы Statistica<br>Independent (grouping) variable: breed<br>Kruskal-Wallis test: H ( 1, N= 28) =,7302469 p =,3928 |            |                 |              |
|                        | Code                                                                                                                                                                                      | Valid<br>N | Sum of<br>Ranks | Mean<br>Rank |
|                        | dpb                                                                                                                                                                                       | 103        | 24              | 335,0000     |
|                        | b                                                                                                                                                                                         | 104        | 4               | 71,0000      |
| Depend.:<br>rs15619223 | Kruskal-Wallis ANOVA by Ranks; rs15619223 (подсчет аллели - комбинир группы Statistica<br>Independent (grouping) variable: breed<br>Kruskal-Wallis test: H ( 1, N= 36) =4,844456 p =,0277 |            |                 |              |
|                        | Code                                                                                                                                                                                      | Valid<br>N | Sum of<br>Ranks | Mean<br>Rank |
|                        | dpb                                                                                                                                                                                       | 103        | 24              | 509,5000     |
|                        | d                                                                                                                                                                                         | 105        | 12              | 156,5000     |
| Depend.:<br>rs15619223 | Kruskal-Wallis ANOVA by Ranks; rs15619223 (подсчет аллели - комбинир группы Statistica<br>Independent (grouping) variable: breed<br>Kruskal-Wallis test: H ( 1, N= 16) =3,770250 p =,0522 |            |                 |              |
|                        | Code                                                                                                                                                                                      | Valid<br>N | Sum of<br>Ranks | Mean<br>Rank |
|                        | d                                                                                                                                                                                         | 105        | 12              | 86,00000     |
|                        | b                                                                                                                                                                                         | 104        | 4               | 50,00000     |

|            |     |        |        |        |        |
|------------|-----|--------|--------|--------|--------|
| rs15619223 | egg | m      | dpb    | b      | d      |
| egg        |     | 0.0127 | 0.0012 | 0.0143 | 0.0268 |
| m          |     |        | 0.029  | 0.139  | 0.0122 |
| dpb        |     |        |        | 0.392  | 0.027  |
| b          |     |        |        |        | 0.052  |

d: rs14491017

|                                                                                                                                                                                         |      |            |                 |              |  |
|-----------------------------------------------------------------------------------------------------------------------------------------------------------------------------------------|------|------------|-----------------|--------------|--|
| Kruskal-Wallis ANOVA by Ranks; rs14491017 (подсчет аллели - комбинир группы Statisti<br>Independent (grouping) variable: breed<br>Kruskal-Wallis test: H ( 4, N= 49) =17,20866 p =,0018 |      |            |                 |              |  |
| Depend.:<br>rs14491017                                                                                                                                                                  | Code | Valid<br>N | Sum of<br>Ranks | Mean<br>Rank |  |
| egg                                                                                                                                                                                     | 101  | 5          | 213,5000        | 42,70000     |  |
| m                                                                                                                                                                                       | 102  | 4          | 22,5000         | 5,62500      |  |
| dpb                                                                                                                                                                                     | 103  | 24         | 551,0000        | 22,95833     |  |
| b                                                                                                                                                                                       | 104  | 4          | 82,0000         | 20,50000     |  |
| d                                                                                                                                                                                       | 105  | 12         | 356,0000        | 29,66667     |  |
| Kruskal-Wallis ANOVA by Ranks; rs14491017 (подсчет аллели - комбинир группы Statisti<br>Independent (grouping) variable: breed<br>Kruskal-Wallis test: H ( 1, N= 9) =6,050420 p =,0139  |      |            |                 |              |  |
| Depend.:<br>rs14491017                                                                                                                                                                  | Code | Valid<br>N | Sum of<br>Ranks | Mean<br>Rank |  |
| egg                                                                                                                                                                                     | 101  | 5          | 35,00000        | 7,000000     |  |
| m                                                                                                                                                                                       | 102  | 4          | 10,00000        | 2,500000     |  |
| Kruskal-Wallis ANOVA by Ranks; rs14491017 (подсчет аллели - комбинир группы Statisti<br>Independent (grouping) variable: breed<br>Kruskal-Wallis test: H ( 1, N= 29) =9,557311 p =,0020 |      |            |                 |              |  |
| Depend.:<br>rs14491017                                                                                                                                                                  | Code | Valid<br>N | Sum of<br>Ranks | Mean<br>Rank |  |
| egg                                                                                                                                                                                     | 101  | 5          | 128,5000        | 25,70000     |  |
| dpb                                                                                                                                                                                     | 103  | 24         | 306,5000        | 12,77083     |  |
| Kruskal-Wallis ANOVA by Ranks; rs14491017 (подсчет аллели - комбинир группы Statisti<br>Independent (grouping) variable: breed<br>Kruskal-Wallis test: H ( 1, N= 17) =2,861981 p =,0907 |      |            |                 |              |  |
| Depend.:<br>rs14491017                                                                                                                                                                  | Code | Valid<br>N | Sum of<br>Ranks | Mean<br>Rank |  |
| egg                                                                                                                                                                                     | 101  | 5          | 61,00000        | 12,20000     |  |
| d                                                                                                                                                                                       | 105  | 12         | 92,00000        | 7,66667      |  |
| Kruskal-Wallis ANOVA by Ranks; rs14491017 (подсчет аллели - комбинир группы Statisti<br>Independent (grouping) variable: breed<br>Kruskal-Wallis test: H ( 1, N= 9) =4,900840 p =,0268  |      |            |                 |              |  |
| Depend.:<br>rs14491017                                                                                                                                                                  | Code | Valid<br>N | Sum of<br>Ranks | Mean<br>Rank |  |
| egg                                                                                                                                                                                     | 101  | 5          | 34,00000        | 6,800000     |  |
| b                                                                                                                                                                                       | 104  | 4          | 11,00000        | 2,750000     |  |
| Kruskal-Wallis ANOVA by Ranks; rs14491017 (подсчет аллели - комбинир группы Statisti<br>Independent (grouping) variable: breed<br>Kruskal-Wallis test: H ( 1, N= 28) =8,356262 p =,0038 |      |            |                 |              |  |
| Depend.:<br>rs14491017                                                                                                                                                                  | Code | Valid<br>N | Sum of<br>Ranks | Mean<br>Rank |  |
| m                                                                                                                                                                                       | 102  | 4          | 14,0000         | 3,50000      |  |
| dpb                                                                                                                                                                                     | 103  | 24         | 392,0000        | 16,33333     |  |
| Kruskal-Wallis ANOVA by Ranks; rs14491017 (подсчет аллели - комбинир группы Statisti<br>Independent (grouping) variable: breed<br>Kruskal-Wallis test: H ( 1, N= 8) =1,707831 p =,1913  |      |            |                 |              |  |
| Depend.:<br>rs14491017                                                                                                                                                                  | Code | Valid<br>N | Sum of<br>Ranks | Mean<br>Rank |  |
| m                                                                                                                                                                                       | 102  | 4          | 13,50000        | 3,375000     |  |
| b                                                                                                                                                                                       | 104  | 4          | 22,50000        | 5,625000     |  |

|                        |                                                                                                                                                                                          |            |                 |              |          |
|------------------------|------------------------------------------------------------------------------------------------------------------------------------------------------------------------------------------|------------|-----------------|--------------|----------|
| Depend.:<br>rs14491017 | Kruskal-Wallis ANOVA by Ranks; rs14491017 (подсчет аллели - комбинир группы Statistic<br>Independent (grouping) variable: breed<br>Kruskal-Wallis test: H ( 1, N= 16) =5,316642 p =,0211 |            |                 |              |          |
|                        | Code                                                                                                                                                                                     | Valid<br>N | Sum of<br>Ranks | Mean<br>Rank |          |
|                        | m                                                                                                                                                                                        | 102        | 4               | 15,0000      | 3,75000  |
|                        | d                                                                                                                                                                                        | 105        | 12              | 121,0000     | 10,08333 |
| Depend.:<br>rs14491017 | Kruskal-Wallis ANOVA by Ranks; rs14491017 (подсчет аллели - комбинир группы Statistic<br>Independent (grouping) variable: breed<br>Kruskal-Wallis test: H ( 1, N= 28) =,1555129 p =,6933 |            |                 |              |          |
|                        | Code                                                                                                                                                                                     | Valid<br>N | Sum of<br>Ranks | Mean<br>Rank |          |
|                        | dpb                                                                                                                                                                                      | 103        | 24              | 354,0000     | 14,75000 |
|                        | b                                                                                                                                                                                        | 104        | 4               | 52,0000      | 13,00000 |
| Depend.:<br>rs14491017 | Kruskal-Wallis ANOVA by Ranks; rs14491017 (подсчет аллели - комбинир группы Statistic<br>Independent (grouping) variable: breed<br>Kruskal-Wallis test: H ( 1, N= 36) =2,333465 p =,1266 |            |                 |              |          |
|                        | Code                                                                                                                                                                                     | Valid<br>N | Sum of<br>Ranks | Mean<br>Rank |          |
|                        | dpb                                                                                                                                                                                      | 103        | 24              | 398,5000     | 16,60417 |
|                        | d                                                                                                                                                                                        | 105        | 12              | 267,5000     | 22,29167 |
| Depend.:<br>rs14491017 | Kruskal-Wallis ANOVA by Ranks; rs14491017 (подсчет аллели - комбинир группы Statistic<br>Independent (grouping) variable: breed<br>Kruskal-Wallis test: H ( 1, N= 16) =,8296460 p =,3624 |            |                 |              |          |
|                        | Code                                                                                                                                                                                     | Valid<br>N | Sum of<br>Ranks | Mean<br>Rank |          |
|                        | b                                                                                                                                                                                        | 104        | 4               | 26,5000      | 6,625000 |
|                        | d                                                                                                                                                                                        | 105        | 12              | 109,5000     | 9,125000 |

|            |     |       |       |       |       |
|------------|-----|-------|-------|-------|-------|
| rs14491017 | egg | m     | dpb   | b     | d     |
| egg        |     | 0.013 | 0.002 | 0.026 | 0.09  |
| m          |     |       | 0.003 | 0.191 | 0.211 |
| dpb        |     |       |       | 0.693 | 0.126 |
| b          |     |       |       |       | 0.362 |



e: rs14491028

|                        |                                                                                                                                                                                           |            |                 |              |
|------------------------|-------------------------------------------------------------------------------------------------------------------------------------------------------------------------------------------|------------|-----------------|--------------|
| Depend.:<br>rs14491028 | Kruskal-Wallis ANOVA by Ranks; rs14491028 (подсчет аллели - комбинир группы Statistica<br>Independent (grouping) variable: breed<br>Kruskal-Wallis test: H ( 4, N= 49) =12,08244 p =,0167 |            |                 |              |
|                        | Code                                                                                                                                                                                      | Valid<br>N | Sum of<br>Ranks | Mean<br>Rank |
|                        | egg                                                                                                                                                                                       | 101        | 5               | 222,5000     |
|                        | m                                                                                                                                                                                         | 102        | 4               | 63,0000      |
|                        | dpb                                                                                                                                                                                       | 103        | 24              | 575,0000     |
|                        | b                                                                                                                                                                                         | 104        | 4               | 72,5000      |
| Depend.:<br>rs14491028 | Kruskal-Wallis ANOVA by Ranks; rs14491028 (подсчет аллели - комбинир группы Statistica<br>Independent (grouping) variable: breed<br>Kruskal-Wallis test: H ( 1, N= 9) =6,000000 p =,0143  |            |                 |              |
|                        | Code                                                                                                                                                                                      | Valid<br>N | Sum of<br>Ranks | Mean<br>Rank |
|                        | egg                                                                                                                                                                                       | 101        | 5               | 35,00000     |
|                        | m                                                                                                                                                                                         | 102        | 4               | 10,00000     |
| Depend.:<br>rs14491028 | Kruskal-Wallis ANOVA by Ranks; rs14491028 (подсчет аллели - комбинир группы Statistica<br>Independent (grouping) variable: breed<br>Kruskal-Wallis test: H ( 1, N= 29) =10,47914 p =,0012 |            |                 |              |
|                        | Code                                                                                                                                                                                      | Valid<br>N | Sum of<br>Ranks | Mean<br>Rank |
|                        | egg                                                                                                                                                                                       | 101        | 5               | 131,0000     |
|                        | dpb                                                                                                                                                                                       | 103        | 24              | 304,0000     |
| Depend.:<br>rs14491028 | Kruskal-Wallis ANOVA by Ranks; rs14491028 (подсчет аллели - комбинир группы Statistica<br>Independent (grouping) variable: breed<br>Kruskal-Wallis test: H ( 1, N= 9) =6,000000 p =,0143  |            |                 |              |
|                        | Code                                                                                                                                                                                      | Valid<br>N | Sum of<br>Ranks | Mean<br>Rank |
|                        | egg                                                                                                                                                                                       | 101        | 5               | 35,00000     |
|                        | b                                                                                                                                                                                         | 104        | 4               | 10,00000     |
| Depend.:<br>rs14491028 | Kruskal-Wallis ANOVA by Ranks; rs14491028 (подсчет аллели - комбинир группы Statistica<br>Independent (grouping) variable: breed<br>Kruskal-Wallis test: H ( 1, N= 17) =5,148731 p =,0233 |            |                 |              |
|                        | Code                                                                                                                                                                                      | Valid<br>N | Sum of<br>Ranks | Mean<br>Rank |
|                        | egg                                                                                                                                                                                       | 101        | 5               | 66,50000     |
|                        | d                                                                                                                                                                                         | 105        | 12              | 86,50000     |
| Depend.:<br>rs14491028 | Kruskal-Wallis ANOVA by Ranks; rs14491028 (подсчет аллели - комбинир группы Statistica<br>Independent (grouping) variable: breed<br>Kruskal-Wallis test: H ( 1, N= 28) =1,249108 p =,2637 |            |                 |              |
|                        | Code                                                                                                                                                                                      | Valid<br>N | Sum of<br>Ranks | Mean<br>Rank |
|                        | m                                                                                                                                                                                         | 102        | 4               | 41,0000      |
|                        | dpb                                                                                                                                                                                       | 103        | 24              | 365,0000     |
| Depend.:<br>rs14491028 | Kruskal-Wallis ANOVA by Ranks; rs14491028 (подсчет аллели - комбинир группы Statistica<br>Independent (grouping) variable: breed<br>Kruskal-Wallis test: H ( 1, N= 8) =,1897590 p =,6631  |            |                 |              |
|                        | Code                                                                                                                                                                                      | Valid<br>N | Sum of<br>Ranks | Mean<br>Rank |
|                        | m                                                                                                                                                                                         | 102        | 4               | 16,50000     |
|                        | b                                                                                                                                                                                         | 104        | 4               | 19,50000     |
| Depend.:<br>rs14491028 | Kruskal-Wallis ANOVA by Ranks; rs14491028 (подсчет аллели - комбинир группы Statistica<br>Independent (grouping) variable: breed<br>Kruskal-Wallis test: H ( 1, N= 16) =1,065634 p =,3019 |            |                 |              |
|                        | Code                                                                                                                                                                                      | Valid<br>N | Sum of<br>Ranks | Mean<br>Rank |
|                        | m                                                                                                                                                                                         | 102        | 4               | 25,5000      |
|                        | d                                                                                                                                                                                         | 105        | 12              | 110,5000     |

|                        |                                                                                                                                                                                           |            |                 |              |
|------------------------|-------------------------------------------------------------------------------------------------------------------------------------------------------------------------------------------|------------|-----------------|--------------|
| Depend.:<br>rs14491028 | Kruskal-Wallis ANOVA by Ranks; rs14491028 (подсчет аллели - комбинир группы Statistica<br>Independent (grouping) variable: breed<br>Kruskal-Wallis test: H ( 1, N= 28) =,7879323 p =,3747 |            |                 |              |
|                        | Code                                                                                                                                                                                      | Valid<br>N | Sum of<br>Ranks | Mean<br>Rank |
|                        | dpb                                                                                                                                                                                       | 103        | 24              | 361,5000     |
|                        | b                                                                                                                                                                                         | 104        | 4               | 44,5000      |
| Depend.:<br>rs14491028 | Kruskal-Wallis ANOVA by Ranks; rs14491028 (подсчет аллели - комбинир группы Statistica<br>Independent (grouping) variable: breed<br>Kruskal-Wallis test: H ( 1, N= 36) =,2820E-3 p =,9866 |            |                 |              |
|                        | Code                                                                                                                                                                                      | Valid<br>N | Sum of<br>Ranks | Mean<br>Rank |
|                        | dpb                                                                                                                                                                                       | 103        | 24              | 444,5000     |
|                        | d                                                                                                                                                                                         | 105        | 12              | 221,5000     |
| Depend.:<br>rs14491028 | Kruskal-Wallis ANOVA by Ranks; rs14491028 (подсчет аллели - комбинир группы Statistica<br>Independent (grouping) variable: breed<br>Kruskal-Wallis test: H ( 1, N= 16) =,4481481 p =,5032 |            |                 |              |
|                        | Code                                                                                                                                                                                      | Valid<br>N | Sum of<br>Ranks | Mean<br>Rank |
|                        | b                                                                                                                                                                                         | 104        | 4               | 28,5000      |
|                        | d                                                                                                                                                                                         | 105        | 12              | 107,5000     |

|            |     |        |        |        |       |
|------------|-----|--------|--------|--------|-------|
| rs14491028 | egg | m      | dpb    | b      | d     |
| egg        |     | 0.0143 | 0.0012 | 0.0143 | 0.023 |
| m          |     |        | 0.263  | 0.663  | 0.301 |
| dpb        |     |        |        | 0.374  | 0.986 |
| b          |     |        |        |        | 0.503 |

**Supporting Info S2 (f–j): Significance levels of differences in allele frequencies for the five SNPs with dividing the dual purpose group of chickens into the meat-egg and egg-meat subgroups within TCM and using the Kruskal –Wallis test for ANOVA by ranks.** Groups: egg, egg-type; m, meat-type; egm, egg-meat; meg, meat-egg; b, Bantam; and de, fancy (decorative).

**f: GGaluGA265969**

|                                                                                            |      |                                        |                 |              |                                                       |  |
|--------------------------------------------------------------------------------------------|------|----------------------------------------|-----------------|--------------|-------------------------------------------------------|--|
| Kruskal-Wallis ANOVA by Ranks; GGaluGA265969 (подсчет аллели - комбинир группы Statistica) |      | Independent (grouping) variable: breed |                 |              | Kruskal-Wallis test: H ( 5, N= 49) =12,86262 p =,0247 |  |
| Depend.:<br>GGaluGA265969                                                                  | Code | Valid<br>N                             | Sum of<br>Ranks | Mean<br>Rank |                                                       |  |
| egg                                                                                        | 101  | 5                                      | 173,5000        | 34,70000     |                                                       |  |
| m                                                                                          | 102  | 4                                      | 62,5000         | 15,62500     |                                                       |  |
| egm                                                                                        | 103  | 7                                      | 188,0000        | 26,85714     |                                                       |  |
| meg                                                                                        | 104  | 17                                     | 490,5000        | 28,85294     |                                                       |  |
| b                                                                                          | 105  | 4                                      | 133,0000        | 33,25000     |                                                       |  |
| de                                                                                         | 106  | 12                                     | 177,5000        | 14,79167     |                                                       |  |
| Kruskal-Wallis ANOVA by Ranks; GGaluGA265969 (подсчет аллели - комбинир группы Statistica) |      | Independent (grouping) variable: breed |                 |              | Kruskal-Wallis test: H ( 1, N= 12) =,7978022 p =,3718 |  |
| Depend.:<br>GGaluGA265969                                                                  | Code | Valid<br>N                             | Sum of<br>Ranks | Mean<br>Rank |                                                       |  |
| egg                                                                                        | 101  | 5                                      | 38,00000        | 7,600000     |                                                       |  |
| egm                                                                                        | 103  | 7                                      | 40,00000        | 5,714286     |                                                       |  |
| Kruskal-Wallis ANOVA by Ranks; GGaluGA265969 (подсчет аллели - комбинир группы Statistica) |      | Independent (grouping) variable: breed |                 |              | Kruskal-Wallis test: H ( 1, N= 22) =,8848868 p =,3469 |  |
| Depend.:<br>GGaluGA265969                                                                  | Code | Valid<br>N                             | Sum of<br>Ranks | Mean<br>Rank |                                                       |  |
| egg                                                                                        | 101  | 5                                      | 69,5000         | 13,90000     |                                                       |  |
| meg                                                                                        | 104  | 17                                     | 183,5000        | 10,79412     |                                                       |  |
| Kruskal-Wallis ANOVA by Ranks; GGaluGA265969 (подсчет аллели - комбинир группы Statistica) |      | Independent (grouping) variable: breed |                 |              | Kruskal-Wallis test: H ( 1, N= 11) =2,919397 p =,0875 |  |
| Depend.:<br>GGaluGA265969                                                                  | Code | Valid<br>N                             | Sum of<br>Ranks | Mean<br>Rank |                                                       |  |
| m                                                                                          | 102  | 4                                      | 15,00000        | 3,750000     |                                                       |  |
| egm                                                                                        | 103  | 7                                      | 51,00000        | 7,285714     |                                                       |  |
| Kruskal-Wallis ANOVA by Ranks; GGaluGA265969 (подсчет аллели - комбинир группы Statistica) |      | Independent (grouping) variable: breed |                 |              | Kruskal-Wallis test: H ( 1, N= 21) =3,544338 p =,0597 |  |
| Depend.:<br>GGaluGA265969                                                                  | Code | Valid<br>N                             | Sum of<br>Ranks | Mean<br>Rank |                                                       |  |
| m                                                                                          | 102  | 4                                      | 23,0000         | 5,75000      |                                                       |  |
| meg                                                                                        | 104  | 17                                     | 208,0000        | 12,23529     |                                                       |  |
| Kruskal-Wallis ANOVA by Ranks; GGaluGA265969 (подсчет аллели - комбинир группы Statistica) |      | Independent (grouping) variable: breed |                 |              | Kruskal-Wallis test: H ( 1, N= 24) =,2271871 p =,6336 |  |
| Depend.:<br>GGaluGA265969                                                                  | Code | Valid<br>N                             | Sum of<br>Ranks | Mean<br>Rank |                                                       |  |
| egm                                                                                        | 103  | 7                                      | 80,0000         | 11,42857     |                                                       |  |
| meg                                                                                        | 104  | 17                                     | 220,0000        | 12,94118     |                                                       |  |
| Kruskal-Wallis ANOVA by Ranks; GGaluGA265969 (подсчет аллели - комбинир группы Statistica) |      | Independent (grouping) variable: breed |                 |              | Kruskal-Wallis test: H ( 1, N= 11) =,5714286 p =,4497 |  |
| Depend.:<br>GGaluGA265969                                                                  | Code | Valid<br>N                             | Sum of<br>Ranks | Mean<br>Rank |                                                       |  |
| b                                                                                          | 105  | 4                                      | 28,00000        | 7,000000     |                                                       |  |
| egm                                                                                        | 103  | 7                                      | 38,00000        | 5,428571     |                                                       |  |

|                           |                                                                                                                                                                                               |            |                 |              |
|---------------------------|-----------------------------------------------------------------------------------------------------------------------------------------------------------------------------------------------|------------|-----------------|--------------|
| Depend.:<br>GGaluGA265969 | Kruskal-Wallis ANOVA by Ranks; GGaluGA265969 (подсчет аллели - комбинир группы Statistica)<br>Independent (grouping) variable: breed<br>Kruskal-Wallis test: H ( 1, N= 21) =,5802991 p =,4462 |            |                 |              |
|                           | Code                                                                                                                                                                                          | Valid<br>N | Sum of<br>Ranks | Mean<br>Rank |
|                           | b                                                                                                                                                                                             | 105        | 4               | 52,5000      |
|                           | meg                                                                                                                                                                                           | 104        | 17              | 178,5000     |
| Depend.:<br>GGaluGA265969 | Kruskal-Wallis ANOVA by Ranks; GGaluGA265969 (подсчет аллели - комбинир группы Statistica)<br>Independent (grouping) variable: breed<br>Kruskal-Wallis test: H ( 1, N= 19) =3,183511 p =,0744 |            |                 |              |
|                           | Code                                                                                                                                                                                          | Valid<br>N | Sum of<br>Ranks | Mean<br>Rank |
|                           | de                                                                                                                                                                                            | 106        | 12              | 99,00000     |
|                           | egm                                                                                                                                                                                           | 103        | 7               | 91,00000     |
| Depend.:<br>GGaluGA265969 | Kruskal-Wallis ANOVA by Ranks; GGaluGA265969 (подсчет аллели - комбинир группы Statistica)<br>Independent (grouping) variable: breed<br>Kruskal-Wallis test: H ( 1, N= 29) =6,505275 p =,0108 |            |                 |              |
|                           | Code                                                                                                                                                                                          | Valid<br>N | Sum of<br>Ranks | Mean<br>Rank |
|                           | de                                                                                                                                                                                            | 106        | 12              | 122,5000     |
|                           | meg                                                                                                                                                                                           | 104        | 17              | 312,5000     |

g: GGaluGA265966

|                           |  |                                                                                                                                                                                               |            |                 |              |
|---------------------------|--|-----------------------------------------------------------------------------------------------------------------------------------------------------------------------------------------------|------------|-----------------|--------------|
| Depend.:<br>GGaluGA265966 |  | Kruskal-Wallis ANOVA by Ranks; GGaluGA265966 (подсчет аллели - комбинир группы Statistica)<br>Independent (grouping) variable: breed<br>Kruskal-Wallis test: H ( 5, N= 49) =8,462166 p =,1325 |            |                 |              |
|                           |  | Code                                                                                                                                                                                          | Valid<br>N | Sum of<br>Ranks | Mean<br>Rank |
| egg                       |  | 101                                                                                                                                                                                           | 5          | 59,5000         | 11,90000     |
| m                         |  | 102                                                                                                                                                                                           | 4          | 111,5000        | 27,87500     |
| egm                       |  | 103                                                                                                                                                                                           | 7          | 247,0000        | 35,28571     |
| meg                       |  | 104                                                                                                                                                                                           | 17         | 433,5000        | 25,50000     |
| b                         |  | 105                                                                                                                                                                                           | 4          | 105,0000        | 26,25000     |
| de                        |  | 106                                                                                                                                                                                           | 12         | 268,5000        | 22,37500     |
| Depend.:<br>GGaluGA265966 |  | Kruskal-Wallis ANOVA by Ranks; GGaluGA265966 (подсчет аллели - комбинир группы Statistica)<br>Independent (grouping) variable: breed<br>Kruskal-Wallis test: H ( 1, N= 12) =5,564511 p =,0183 |            |                 |              |
|                           |  | Code                                                                                                                                                                                          | Valid<br>N | Sum of<br>Ranks | Mean<br>Rank |
| egg                       |  | 101                                                                                                                                                                                           | 5          | 18,00000        | 3,600000     |
| egm                       |  | 103                                                                                                                                                                                           | 7          | 60,00000        | 8,571429     |
| Depend.:<br>GGaluGA265966 |  | Kruskal-Wallis ANOVA by Ranks; GGaluGA265966 (подсчет аллели - комбинир группы Statistica)<br>Independent (grouping) variable: breed<br>Kruskal-Wallis test: H ( 1, N= 22) =3,694830 p =,0546 |            |                 |              |
|                           |  | Code                                                                                                                                                                                          | Valid<br>N | Sum of<br>Ranks | Mean<br>Rank |
| egg                       |  | 101                                                                                                                                                                                           | 5          | 33,0000         | 6,60000      |
| meg                       |  | 104                                                                                                                                                                                           | 17         | 220,0000        | 12,94118     |
| Depend.:<br>GGaluGA265966 |  | Kruskal-Wallis ANOVA by Ranks; GGaluGA265966 (подсчет аллели - комбинир группы Statistica)<br>Independent (grouping) variable: breed<br>Kruskal-Wallis test: H ( 1, N= 11) =1,285714 p =,2568 |            |                 |              |
|                           |  | Code                                                                                                                                                                                          | Valid<br>N | Sum of<br>Ranks | Mean<br>Rank |
| m                         |  | 102                                                                                                                                                                                           | 4          | 18,00000        | 4,500000     |
| egm                       |  | 103                                                                                                                                                                                           | 7          | 48,00000        | 6,857143     |
| Depend.:<br>GGaluGA265966 |  | Kruskal-Wallis ANOVA by Ranks; GGaluGA265966 (подсчет аллели - комбинир группы Statistica)<br>Independent (grouping) variable: breed<br>Kruskal-Wallis test: H ( 1, N= 21) =,0725222 p =,7877 |            |                 |              |
|                           |  | Code                                                                                                                                                                                          | Valid<br>N | Sum of<br>Ranks | Mean<br>Rank |
| m                         |  | 102                                                                                                                                                                                           | 4          | 47,0000         | 11,75000     |
| meg                       |  | 104                                                                                                                                                                                           | 17         | 184,0000        | 10,82353     |
| Depend.:<br>GGaluGA265966 |  | Kruskal-Wallis ANOVA by Ranks; GGaluGA265966 (подсчет аллели - комбинир группы Statistica)<br>Independent (grouping) variable: breed<br>Kruskal-Wallis test: H ( 1, N= 11) =2,285714 p =,1306 |            |                 |              |
|                           |  | Code                                                                                                                                                                                          | Valid<br>N | Sum of<br>Ranks | Mean<br>Rank |
| b                         |  | 105                                                                                                                                                                                           | 4          | 16,00000        | 4,000000     |
| egm                       |  | 103                                                                                                                                                                                           | 7          | 50,00000        | 7,142857     |
| Depend.:<br>GGaluGA265966 |  | Kruskal-Wallis ANOVA by Ranks; GGaluGA265966 (подсчет аллели - комбинир группы Statistica)<br>Independent (grouping) variable: breed<br>Kruskal-Wallis test: H ( 1, N= 21) =,0322953 p =,8574 |            |                 |              |
|                           |  | Code                                                                                                                                                                                          | Valid<br>N | Sum of<br>Ranks | Mean<br>Rank |
| b                         |  | 105                                                                                                                                                                                           | 4          | 46,0000         | 11,50000     |
| meg                       |  | 104                                                                                                                                                                                           | 17         | 185,0000        | 10,88235     |

|                           |                                                                                                                                                                                               |            |                 |              |
|---------------------------|-----------------------------------------------------------------------------------------------------------------------------------------------------------------------------------------------|------------|-----------------|--------------|
| Depend.:<br>GGaluGA265966 | Kruskal-Wallis ANOVA by Ranks; GGaluGA265966 (подсчет аллели - комбинир группы Statistica)<br>Independent (grouping) variable: breed<br>Kruskal-Wallis test: H ( 1, N= 29) =,4424843 p =,5059 |            |                 |              |
|                           | Code                                                                                                                                                                                          | Valid<br>N | Sum of<br>Ranks | Mean<br>Rank |
|                           | de                                                                                                                                                                                            | 106        | 12              | 165,0000     |
|                           | meg                                                                                                                                                                                           | 104        | 17              | 270,0000     |
| Depend.:<br>GGaluGA265966 | Kruskal-Wallis ANOVA by Ranks; GGaluGA265966 (подсчет аллели - комбинир группы Statistica)<br>Independent (grouping) variable: breed<br>Kruskal-Wallis test: H ( 1, N= 19) =2,189421 p =,1390 |            |                 |              |
|                           | Code                                                                                                                                                                                          | Valid<br>N | Sum of<br>Ranks | Mean<br>Rank |
|                           | de                                                                                                                                                                                            | 106        | 12              | 102,5000     |
|                           | egm                                                                                                                                                                                           | 103        | 7               | 87,5000      |

h: rs15619223

|                        |                                                                                                                                                                                            |            |                 |              |
|------------------------|--------------------------------------------------------------------------------------------------------------------------------------------------------------------------------------------|------------|-----------------|--------------|
| Depend.:<br>rs15619223 | Kruskal-Wallis ANOVA by Ranks; rs15619223 (подсчет аллели - комбинир группы Statistica)<br>Independent (grouping) variable: breed<br>Kruskal-Wallis test: H ( 5, N= 49) =20,30385 p =,0011 |            |                 |              |
|                        | Code                                                                                                                                                                                       | Valid<br>N | Sum of<br>Ranks | Mean<br>Rank |
|                        | egg                                                                                                                                                                                        | 101        | 5               | 28,0000      |
|                        | m                                                                                                                                                                                          | 102        | 4               | 168,5000     |
|                        | egm                                                                                                                                                                                        | 103        | 7               | 200,5000     |
|                        | meg                                                                                                                                                                                        | 104        | 17              | 475,0000     |
|                        | b                                                                                                                                                                                          | 105        | 4               | 134,0000     |
|                        | de                                                                                                                                                                                         | 106        | 12              | 219,0000     |

|                        |                                                                                                                                                                                            |            |                 |              |
|------------------------|--------------------------------------------------------------------------------------------------------------------------------------------------------------------------------------------|------------|-----------------|--------------|
| Depend.:<br>rs15619223 | Kruskal-Wallis ANOVA by Ranks; rs15619223 (подсчет аллели - комбинир группы Statistica)<br>Independent (grouping) variable: breed<br>Kruskal-Wallis test: H ( 1, N= 12) =7,180220 p =,0074 |            |                 |              |
|                        | Code                                                                                                                                                                                       | Valid<br>N | Sum of<br>Ranks | Mean<br>Rank |
|                        | egg                                                                                                                                                                                        | 101        | 5               | 16,00000     |
|                        | egm                                                                                                                                                                                        | 103        | 7               | 62,00000     |

|                        |                                                                                                                                                                                            |            |                 |              |
|------------------------|--------------------------------------------------------------------------------------------------------------------------------------------------------------------------------------------|------------|-----------------|--------------|
| Depend.:<br>rs15619223 | Kruskal-Wallis ANOVA by Ranks; rs15619223 (подсчет аллели - комбинир группы Statistica)<br>Independent (grouping) variable: breed<br>Kruskal-Wallis test: H ( 1, N= 22) =9,582393 p =,0020 |            |                 |              |
|                        | Code                                                                                                                                                                                       | Valid<br>N | Sum of<br>Ranks | Mean<br>Rank |
|                        | egg                                                                                                                                                                                        | 101        | 5               | 18,0000      |
|                        | meg                                                                                                                                                                                        | 104        | 17              | 235,0000     |

|                        |                                                                                                                                                                                            |            |                 |              |
|------------------------|--------------------------------------------------------------------------------------------------------------------------------------------------------------------------------------------|------------|-----------------|--------------|
| Depend.:<br>rs15619223 | Kruskal-Wallis ANOVA by Ranks; rs15619223 (подсчет аллели - комбинир группы Statistica)<br>Independent (grouping) variable: breed<br>Kruskal-Wallis test: H ( 1, N= 11) =3,376701 p =,0661 |            |                 |              |
|                        | Code                                                                                                                                                                                       | Valid<br>N | Sum of<br>Ranks | Mean<br>Rank |
|                        | m                                                                                                                                                                                          | 102        | 4               | 33,50000     |
|                        | egm                                                                                                                                                                                        | 103        | 7               | 32,50000     |

|                        |                                                                                                                                                                                            |            |                 |              |
|------------------------|--------------------------------------------------------------------------------------------------------------------------------------------------------------------------------------------|------------|-----------------|--------------|
| Depend.:<br>rs15619223 | Kruskal-Wallis ANOVA by Ranks; rs15619223 (подсчет аллели - комбинир группы Statistica)<br>Independent (grouping) variable: breed<br>Kruskal-Wallis test: H ( 1, N= 21) =4,491054 p =,0341 |            |                 |              |
|                        | Code                                                                                                                                                                                       | Valid<br>N | Sum of<br>Ranks | Mean<br>Rank |
|                        | m                                                                                                                                                                                          | 102        | 4               | 67,5000      |
|                        | meg                                                                                                                                                                                        | 104        | 17              | 163,5000     |

|                        |                                                                                                                                                                                            |            |                 |              |
|------------------------|--------------------------------------------------------------------------------------------------------------------------------------------------------------------------------------------|------------|-----------------|--------------|
| Depend.:<br>rs15619223 | Kruskal-Wallis ANOVA by Ranks; rs15619223 (подсчет аллели - комбинир группы Statistica)<br>Independent (grouping) variable: breed<br>Kruskal-Wallis test: H ( 1, N= 24) =,0161837 p =,8988 |            |                 |              |
|                        | Code                                                                                                                                                                                       | Valid<br>N | Sum of<br>Ranks | Mean<br>Rank |
|                        | egm                                                                                                                                                                                        | 103        | 7               | 89,5000      |
|                        | meg                                                                                                                                                                                        | 104        | 17              | 210,5000     |

|                        |                                                                                                                                                                                            |            |                 |              |
|------------------------|--------------------------------------------------------------------------------------------------------------------------------------------------------------------------------------------|------------|-----------------|--------------|
| Depend.:<br>rs15619223 | Kruskal-Wallis ANOVA by Ranks; rs15619223 (подсчет аллели - комбинир группы Statistica)<br>Independent (grouping) variable: breed<br>Kruskal-Wallis test: H ( 1, N= 11) =,3214286 p =,5708 |            |                 |              |
|                        | Code                                                                                                                                                                                       | Valid<br>N | Sum of<br>Ranks | Mean<br>Rank |
|                        | b                                                                                                                                                                                          | 105        | 4               | 27,00000     |
|                        | egm                                                                                                                                                                                        | 103        | 7               | 39,00000     |

|                        |      |                                                                                         |                 |              |  |  |  |  |  |
|------------------------|------|-----------------------------------------------------------------------------------------|-----------------|--------------|--|--|--|--|--|
|                        |      | Kruskal-Wallis ANOVA by Ranks; rs15619223 (подсчет апелли - комбинир группы Statistica) |                 |              |  |  |  |  |  |
|                        |      | Independent (grouping) variable: breed                                                  |                 |              |  |  |  |  |  |
|                        |      | Kruskal-Wallis test: H ( 1, N= 21) =,8037047 p =,3700                                   |                 |              |  |  |  |  |  |
| Depend.:<br>rs15619223 | Code | Valid<br>N                                                                              | Sum of<br>Ranks | Mean<br>Rank |  |  |  |  |  |
| b                      | 105  | 4                                                                                       | 54,0000         | 13,50000     |  |  |  |  |  |
| meg                    | 104  | 17                                                                                      | 177,0000        | 10,41176     |  |  |  |  |  |

|                        |      |                                                                                         |                 |              |  |  |  |  |  |
|------------------------|------|-----------------------------------------------------------------------------------------|-----------------|--------------|--|--|--|--|--|
|                        |      | Kruskal-Wallis ANOVA by Ranks; rs15619223 (подсчет апелли - комбинир группы Statistica) |                 |              |  |  |  |  |  |
|                        |      | Independent (grouping) variable: breed                                                  |                 |              |  |  |  |  |  |
|                        |      | Kruskal-Wallis test: H ( 1, N= 19) =2,725635 p =,0987                                   |                 |              |  |  |  |  |  |
| Depend.:<br>rs15619223 | Code | Valid<br>N                                                                              | Sum of<br>Ranks | Mean<br>Rank |  |  |  |  |  |
| de                     | 106  | 12                                                                                      | 100,5000        | 8,37500      |  |  |  |  |  |
| egm                    | 103  | 7                                                                                       | 89,5000         | 12,78571     |  |  |  |  |  |

|                        |      |                                                                                         |                 |              |  |  |  |  |  |
|------------------------|------|-----------------------------------------------------------------------------------------|-----------------|--------------|--|--|--|--|--|
|                        |      | Kruskal-Wallis ANOVA by Ranks; rs15619223 (подсчет апелли - комбинир группы Statistica) |                 |              |  |  |  |  |  |
|                        |      | Independent (grouping) variable: breed                                                  |                 |              |  |  |  |  |  |
|                        |      | Kruskal-Wallis test: H ( 1, N= 29) =4,158237 p =,0414                                   |                 |              |  |  |  |  |  |
| Depend.:<br>rs15619223 | Code | Valid<br>N                                                                              | Sum of<br>Ranks | Mean<br>Rank |  |  |  |  |  |
| de                     | 106  | 12                                                                                      | 134,0000        | 11,16667     |  |  |  |  |  |
| meg                    | 104  | 17                                                                                      | 301,0000        | 17,70588     |  |  |  |  |  |



i: rs14491017

|                                                                                                                                                                                       |      |            |                 |              |
|---------------------------------------------------------------------------------------------------------------------------------------------------------------------------------------|------|------------|-----------------|--------------|
| Kruskal-Wallis ANOVA by Ranks; rs14491017 (подсчет аллели - комбинир группы Statistic Independent (grouping) variable: breed<br>Kruskal-Wallis test: H ( 5, N= 49) =18,11088 p =,0028 |      |            |                 |              |
| Depend.:<br>rs14491017                                                                                                                                                                | Code | Valid<br>N | Sum of<br>Ranks | Mean<br>Rank |
| egg                                                                                                                                                                                   | 101  | 5          | 213,5000        | 42,70000     |
| m                                                                                                                                                                                     | 102  | 4          | 22,5000         | 5,62500      |
| egm                                                                                                                                                                                   | 103  | 7          | 130,5000        | 18,64286     |
| meg                                                                                                                                                                                   | 104  | 17         | 420,5000        | 24,73529     |
| b                                                                                                                                                                                     | 105  | 4          | 82,0000         | 20,50000     |
| de                                                                                                                                                                                    | 106  | 12         | 356,0000        | 29,66667     |
| Kruskal-Wallis ANOVA by Ranks; rs14491017 (подсчет аллели - комбинир группы Statistic Independent (grouping) variable: breed<br>Kruskal-Wallis test: H ( 1, N= 12) =7,205414 p =,0073 |      |            |                 |              |
| Depend.:<br>rs14491017                                                                                                                                                                | Code | Valid<br>N | Sum of<br>Ranks | Mean<br>Rank |
| egg                                                                                                                                                                                   | 101  | 5          | 49,00000        | 9,800000     |
| egm                                                                                                                                                                                   | 103  | 7          | 29,00000        | 4,142857     |
| Kruskal-Wallis ANOVA by Ranks; rs14491017 (подсчет аллели - комбинир группы Statistic Independent (grouping) variable: breed<br>Kruskal-Wallis test: H ( 1, N= 22) =8,436415 p =,0037 |      |            |                 |              |
| Depend.:<br>rs14491017                                                                                                                                                                | Code | Valid<br>N | Sum of<br>Ranks | Mean<br>Rank |
| egg                                                                                                                                                                                   | 101  | 5          | 94,5000         | 18,90000     |
| meg                                                                                                                                                                                   | 104  | 17         | 158,5000        | 9,32353      |
| Kruskal-Wallis ANOVA by Ranks; rs14491017 (подсчет аллели - комбинир группы Statistic Independent (grouping) variable: breed<br>Kruskal-Wallis test: H ( 1, N= 11) =6,035714 p =,0140 |      |            |                 |              |
| Depend.:<br>rs14491017                                                                                                                                                                | Code | Valid<br>N | Sum of<br>Ranks | Mean<br>Rank |
| m                                                                                                                                                                                     | 102  | 4          | 11,00000        | 2,750000     |
| egm                                                                                                                                                                                   | 103  | 7          | 55,00000        | 7,857143     |
| Kruskal-Wallis ANOVA by Ranks; rs14491017 (подсчет аллели - комбинир группы Statistic Independent (grouping) variable: breed<br>Kruskal-Wallis test: H ( 1, N= 21) =7,733665 p =,0054 |      |            |                 |              |
| Depend.:<br>rs14491017                                                                                                                                                                | Code | Valid<br>N | Sum of<br>Ranks | Mean<br>Rank |
| m                                                                                                                                                                                     | 102  | 4          | 13,0000         | 3,25000      |
| meg                                                                                                                                                                                   | 104  | 17         | 218,0000        | 12,82353     |
| Kruskal-Wallis ANOVA by Ranks; rs14491017 (подсчет аллели - комбинир группы Statistic Independent (grouping) variable: breed<br>Kruskal-Wallis test: H ( 1, N= 24) =2,426451 p =,1193 |      |            |                 |              |
| Depend.:<br>rs14491017                                                                                                                                                                | Code | Valid<br>N | Sum of<br>Ranks | Mean<br>Rank |
| egm                                                                                                                                                                                   | 103  | 7          | 63,0000         | 9,00000      |
| meg                                                                                                                                                                                   | 104  | 17         | 237,0000        | 13,94118     |
| Kruskal-Wallis ANOVA by Ranks; rs14491017 (подсчет аллели - комбинир группы Statistic Independent (grouping) variable: breed<br>Kruskal-Wallis test: H ( 1, N= 11) =,0357143 p =,8501 |      |            |                 |              |
| Depend.:<br>rs14491017                                                                                                                                                                | Code | Valid<br>N | Sum of<br>Ranks | Mean<br>Rank |
| b                                                                                                                                                                                     | 105  | 4          | 23,00000        | 5,750000     |
| egm                                                                                                                                                                                   | 103  | 7          | 43,00000        | 6,142857     |

|                        |                                                                                                                                                                                          |            |                 |              |
|------------------------|------------------------------------------------------------------------------------------------------------------------------------------------------------------------------------------|------------|-----------------|--------------|
| Depend.:<br>rs14491017 | Kruskal-Wallis ANOVA by Ranks; rs14491017 (подсчет аллели - комбинир группы Statistic<br>Independent (grouping) variable: breed<br>Kruskal-Wallis test: H ( 1, N= 21) =,2015819 p =,6534 |            |                 |              |
|                        | Code                                                                                                                                                                                     | Valid<br>N | Sum of<br>Ranks | Mean<br>Rank |
|                        | b                                                                                                                                                                                        | 105        | 4               | 39,0000      |
|                        | meg                                                                                                                                                                                      | 104        | 17              | 192,0000     |
| Depend.:<br>rs14491017 | Kruskal-Wallis ANOVA by Ranks; rs14491017 (подсчет аллели - комбинир группы Statistic<br>Independent (grouping) variable: breed<br>Kruskal-Wallis test: H ( 1, N= 29) =1,539530 p =,2147 |            |                 |              |
|                        | Code                                                                                                                                                                                     | Valid<br>N | Sum of<br>Ranks | Mean<br>Rank |
|                        | de                                                                                                                                                                                       | 106        | 12              | 208,0000     |
|                        | meg                                                                                                                                                                                      | 104        | 17              | 227,0000     |
| Depend.:<br>rs14491017 | Kruskal-Wallis ANOVA by Ranks; rs14491017 (подсчет аллели - комбинир группы Statistic<br>Independent (grouping) variable: breed<br>Kruskal-Wallis test: H ( 1, N= 19) =2,191344 p =,1388 |            |                 |              |
|                        | Code                                                                                                                                                                                     | Valid<br>N | Sum of<br>Ranks | Mean<br>Rank |
|                        | de                                                                                                                                                                                       | 106        | 12              | 137,5000     |
|                        | egm                                                                                                                                                                                      | 103        | 7               | 52,5000      |

j: rs14491028

|                     |      |                                                                                                                                                                                           |              |           |
|---------------------|------|-------------------------------------------------------------------------------------------------------------------------------------------------------------------------------------------|--------------|-----------|
| Depend.: rs14491028 |      | Kruskal-Wallis ANOVA by Ranks; rs14491028 (подсчет аллели - комбинир группы Statistica<br>Independent (grouping) variable: breed<br>Kruskal-Wallis test: H ( 5, N= 49) =16,88817 p =,0047 |              |           |
|                     | Code | Valid N                                                                                                                                                                                   | Sum of Ranks | Mean Rank |
| egg                 | 101  | 5                                                                                                                                                                                         | 222,5000     | 44,50000  |
| m                   | 102  | 4                                                                                                                                                                                         | 63,0000      | 15,75000  |
| egm                 | 103  | 7                                                                                                                                                                                         | 98,0000      | 14,00000  |
| meg                 | 104  | 17                                                                                                                                                                                        | 477,0000     | 28,05882  |
| b                   | 105  | 4                                                                                                                                                                                         | 72,5000      | 18,12500  |
| de                  | 106  | 12                                                                                                                                                                                        | 292,0000     | 24,33333  |
| Depend.: rs14491028 |      | Kruskal-Wallis ANOVA by Ranks; rs14491028 (подсчет аллели - комбинир группы Statistica<br>Independent (grouping) variable: breed<br>Kruskal-Wallis test: H ( 1, N= 12) =8,076923 p =,0045 |              |           |
|                     | Code | Valid N                                                                                                                                                                                   | Sum of Ranks | Mean Rank |
| egg                 | 101  | 5                                                                                                                                                                                         | 50,00000     | 10,00000  |
| egm                 | 103  | 7                                                                                                                                                                                         | 28,00000     | 4,00000   |
| Depend.: rs14491028 |      | Kruskal-Wallis ANOVA by Ranks; rs14491028 (подсчет аллели - комбинир группы Statistica<br>Independent (grouping) variable: breed<br>Kruskal-Wallis test: H ( 1, N= 21) =3,229527 p =,0723 |              |           |
|                     | Code | Valid N                                                                                                                                                                                   | Sum of Ranks | Mean Rank |
| m                   | 102  | 4                                                                                                                                                                                         | 24,0000      | 6,00000   |
| meg                 | 104  | 17                                                                                                                                                                                        | 207,0000     | 12,17647  |
| Depend.: rs14491028 |      | Kruskal-Wallis ANOVA by Ranks; rs14491028 (подсчет аллели - комбинир группы Statistica<br>Independent (grouping) variable: breed<br>Kruskal-Wallis test: H ( 1, N= 11) =,3214286 p =,5708 |              |           |
|                     | Code | Valid N                                                                                                                                                                                   | Sum of Ranks | Mean Rank |
| m                   | 102  | 4                                                                                                                                                                                         | 27,00000     | 6,750000  |
| egm                 | 103  | 7                                                                                                                                                                                         | 39,00000     | 5,571429  |
| Depend.: rs14491028 |      | Kruskal-Wallis ANOVA by Ranks; rs14491028 (подсчет аллели - комбинир группы Statistica<br>Independent (grouping) variable: breed<br>Kruskal-Wallis test: H ( 1, N= 24) =5,697039 p =,0170 |              |           |
|                     | Code | Valid N                                                                                                                                                                                   | Sum of Ranks | Mean Rank |
| egm                 | 103  | 7                                                                                                                                                                                         | 50,0000      | 7,14286   |
| meg                 | 104  | 17                                                                                                                                                                                        | 250,0000     | 14,70588  |
| Depend.: rs14491028 |      | Kruskal-Wallis ANOVA by Ranks; rs14491028 (подсчет аллели - комбинир группы Statistica<br>Independent (grouping) variable: breed<br>Kruskal-Wallis test: H ( 1, N= 11) =,3214286 p =,5708 |              |           |
|                     | Code | Valid N                                                                                                                                                                                   | Sum of Ranks | Mean Rank |
| b                   | 105  | 4                                                                                                                                                                                         | 27,00000     | 6,750000  |
| egm                 | 103  | 7                                                                                                                                                                                         | 39,00000     | 5,571429  |
| Depend.: rs14491028 |      | Kruskal-Wallis ANOVA by Ranks; rs14491028 (подсчет аллели - комбинир группы Statistica<br>Independent (grouping) variable: breed<br>Kruskal-Wallis test: H ( 1, N= 21) =2,199534 p =,1381 |              |           |
|                     | Code | Valid N                                                                                                                                                                                   | Sum of Ranks | Mean Rank |
| b                   | 105  | 4                                                                                                                                                                                         | 27,5000      | 6,87500   |
| meg                 | 104  | 17                                                                                                                                                                                        | 203,5000     | 11,97059  |

|                        |                                                                                                                                                                                           |            |                 |              |
|------------------------|-------------------------------------------------------------------------------------------------------------------------------------------------------------------------------------------|------------|-----------------|--------------|
| Depend.:<br>rs14491028 | Kruskal-Wallis ANOVA by Ranks; rs14491028 (подсчет аллели - комбинир группы Statistica<br>Independent (grouping) variable: breed<br>Kruskal-Wallis test: H ( 1, N= 19) =1,833396 p =,1757 |            |                 |              |
|                        | Code                                                                                                                                                                                      | Valid<br>N | Sum of<br>Ranks | Mean<br>Rank |
|                        | de                                                                                                                                                                                        | 106        | 12              | 136,0000     |
|                        | egm                                                                                                                                                                                       | 103        | 7               | 54,0000      |
