# Supplementary material for: Evolutionary Subdivision of Domestic Chickens: Implications for Local Breeds as Assessed by Phenotype and Genotype in Comparison to Commercial and Fancy Breeds
Source: MDPI journal article supplement (doi:10.3390/agriculture11100914), 2021-09-24
Supplement: s1 [file s1]

**Table S1.** Forty-nine chicken breeds, strains and crosses used in the study and listed in accordance with TCM.

| Breed/population                              | Abbreviation   | Origin                     | Initial breeds                                              | Other                                                             | No. of samples | Sampling source <sup>1</sup> , year |
|-----------------------------------------------|----------------|----------------------------|-------------------------------------------------------------|-------------------------------------------------------------------|----------------|-------------------------------------|
| Egg-type breeds/populations                   |                |                            |                                                             |                                                                   |                |                                     |
| Leghorn Light Brown (or Italian Partridge)    | LLB            | Italy                      | local light breeds from Tuscany                             | probable random mating to Czech Golden                            | 19             | BC/RRIFAGB, 2016                    |
| Minorca Black                                 | MB             | Spain, UK                  | local Minorcan chickens                                     | probable random mating to PB and AoB                              | 19             | BC/RRIFAGB, 2016                    |
| Russian White                                 | RWG            | Pushkin, Russia            | local chickens mated to White Leghorn                       | produced from RWS using a single telic mating to White Leghorns   | 30             | BC/RRIFAGB, 2016                    |
|                                               | RWS            | Pushkin, Russia            | local chickens mated to White Leghorns                      | an inbred strain selected for cold tolerance                      | 6              | BC/RRIFAGB, 2001                    |
|                                               | RWP            | Sergiev Posad, Russia      | local chickens mated to White Leghorns                      | samples obtained from an ARPRTI population                        | 11             | ARPRTI, 2001                        |
| Meat and related breeds/populations           |                |                            |                                                             |                                                                   |                |                                     |
| White Cornish, Line 1                         | WC1            | England, Russia            | local game chickens, Asil, White Malay, Indian Game, Cochin | parental line 1 (of commercial cross Smena-6)                     | 18             | SPBFS, 2006                         |
| White Cornish, Line 2                         | WC2            |                            |                                                             | parental line 2 (of commercial cross Smena-6)                     | 19             | SPBFS, 2006                         |
| White Cornish × (Brahma Light × Sussex Light) | WC × (BL × SL) | Pushkin, Russia            | WC, BL, SL                                                  | F <sub>1</sub> hybrids bred <i>inter se</i>                       | 14             | BC/RRIFAGB, 2016                    |
| White Cornish × (Sussex Light × Amrock)       | WC × (SL × Ar) |                            | WC, SL, Ar                                                  | F <sub>1</sub> hybrids bred <i>inter se</i>                       | 14             | BC/RRIFAGB, 2016                    |
| Red White-tailed Dwarf                        | RWD            | England                    | Plymouth Rock White, NH                                     | a purebred parental strain (of imported commercial broiler cross) | 18             | BC/RRIFAGB, 2016                    |
| Dual purpose breeds/populations               |                |                            |                                                             |                                                                   |                |                                     |
| Egg-meat type and related breeds/populations  |                |                            |                                                             |                                                                   |                |                                     |
| Zagorsk Salmon                                | ZS             | Sergiev Posad, USSR/Russia | Russian White, NH, RIR, YC                                  | probable random mating to FS                                      | 18             | BC/RRIFAGB, 2016                    |

|                                                     |     |                                  |                                                                                       |                                                   |    |                     |
|-----------------------------------------------------|-----|----------------------------------|---------------------------------------------------------------------------------------|---------------------------------------------------|----|---------------------|
| Pushkin                                             | Pu  | Pushkin,<br>USSR/Russia          | ABS, White Leghorn, Moscow<br>White, PRB, commercial cross<br>Broiler-6               | a purebred strain                                 | 20 | BC/RRIFAGB,<br>2016 |
| Rhode Island Red                                    | RIR | USA                              | Cochin, Java, Malay, Shanghai,<br>Brown Leghorn                                       | a non-selected population<br>randomly mated to NH | 32 | BC/RRIFAGB,<br>2016 |
| Leningrad Mille Fleur                               | LMF | Pushkin,<br>USSR/Russia          | ABS, NH, PC                                                                           | a single telic mating to<br>Orloff                | 21 | BC/RRIFAGB,<br>2016 |
| New Hampshire                                       | NH  | USA                              | RIR                                                                                   | probable random mating to<br>MG, PC and RIR       | 19 | BC/RRIFAGB,<br>2016 |
| Leningrad Golden-<br>and-gray                       | LGG | Pushkin,<br>USSR/Russia          | ABS, White Leghorn, Moscow<br>White, PRB, LLB, NH                                     | a purebred strain                                 | 20 | BC/RRIFAGB,<br>2016 |
| Pantsirevka Black                                   | PB  | Ulyanovsk Oblast,<br>USSR/Russia | White Leghorn, RIR, NH, AoB,<br>Plymouth Rock White                                   | probable random mating to<br>AoB and MB           | 17 | BC/RRIFAGB,<br>2016 |
| <i>Meat-egg type and related breeds/populations</i> |     |                                  |                                                                                       |                                                   |    |                     |
| Australorp Black<br>Speckled                        | ABS | Pushkin,<br>USSR/Russia          | AoB                                                                                   | a purebred strain                                 | 20 | BC/RRIFAGB,<br>2016 |
| Aurora Blue                                         | AB  | Pushkin, Russia                  | ABS                                                                                   | probable random mating to<br>AoB                  | 20 | BC/RRIFAGB,<br>2016 |
| Australorp Black                                    | AoB | Australia                        | Black Orpington, RIR, MB, White<br>Leghorn, Langshan, Plymouth<br>Rock                | probable random mating to<br>PB and MB            | 9  | BC/RRIFAGB,<br>2016 |
| Amrock                                              | Ar  | USA                              | Dominique, Cochin Black, Java<br>Black                                                | probable random mating to<br>PRB                  | 20 | BC/RRIFAGB,<br>2016 |
| Naked Neck                                          | NN  | Transylvania,<br>Romania         | local chickens                                                                        | a purebred strain                                 | 20 | BC/RRIFAGB,<br>2016 |
| Pervomai                                            | Pm  | USSR/Ukraine,<br>Russia          | Wyandotte White , RIR, YC                                                             | probable random mating to<br>SL and BL            | 20 | BC/RRIFAGB,<br>2016 |
| Plymouth Rock Barred                                | PRB | USA                              | Java Black, Brahma, Cochin White<br>and Buff, Dominique, White-faced<br>Black Spanish | probable random mating to<br>Ar                   | 19 | BC/RRIFAGB,<br>2016 |
| Poltava Clay                                        | PC  | USSR/Ukraine                     | local chickens, Buff Orpington,<br>NH, Wyandotte and others                           | a purebred strain                                 | 17 | BC/RRIFAGB,<br>2016 |
| Sussex Light                                        | SL  | England                          | local chickens, Brahma, Cochin,<br>Dorking                                            | probable random mating to<br>Pm and BL            | 20 | BC/RRIFAGB,<br>2016 |

|                                                |                |                           |                                                                                               |                                                                          |    |                     |
|------------------------------------------------|----------------|---------------------------|-----------------------------------------------------------------------------------------------|--------------------------------------------------------------------------|----|---------------------|
| Faverolles Salmon                              | FS             | France                    | local chickens, Brahma, Houdan ,<br>Dorking, Cochin, Langshan                                 | probable random mating to<br>ZS                                          | 20 | BC/RRIFAGB,<br>2016 |
| Tsarskoye Selo                                 | Ts             | Pushkin, Russia           | PRB, PC, NH, commercial cross<br>Broiler-6                                                    | a purebred strain                                                        | 20 | BC/RRIFAGB,<br>2016 |
| Yurlov Crower                                  | YC             | Russia                    | local and game chickens, Brahma,<br>Cochin, Langshan                                          | of two varieties (silver and<br>golden); probable random<br>mating to UG | 20 | BC/RRIFAGB,<br>2016 |
| Sussex Light ×<br>Amrock                       | SL × Ar        | Pushkin, Russia           | SL, Ar                                                                                        | F <sub>1</sub> hybrids bred <i>inter se</i>                              | 14 | BC/RRIFAGB,<br>2016 |
| Tsarskoye Selo ×<br>Sussex Light               | Ts × SL        | Pushkin, Russia           | Ts, SL                                                                                        | F <sub>1</sub> hybrids bred <i>inter se</i>                              | 14 | BC/RRIFAGB,<br>2016 |
| Tsarskoye Selo ×<br>(Sussex Light ×<br>Amrock) | Ts × (SL × Ar) | Pushkin, Russia           | Ts, SL, Ar                                                                                    | F <sub>1</sub> hybrids bred <i>inter se</i>                              | 14 | BC/RRIFAGB,<br>2016 |
| Brahma Light × Sussex<br>Light                 | BL × SL        | Pushkin, Russia           | BL, SL                                                                                        | F <sub>1</sub> hybrids bred <i>inter se</i>                              | 14 | BC/RRIFAGB,<br>2016 |
| Game and related breeds/populations            |                |                           |                                                                                               |                                                                          |    |                     |
| Orloff Mille Fleur                             | OM             | Russia                    | local chickens, Gilan, Old English<br>Game                                                    | a purebred strain                                                        | 20 | BC/RRIFAGB,<br>2016 |
| Moscow Game                                    | MG             | Russia                    | local chickens, Gilan, Old English<br>Game, Malay, other game breeds<br>from Belgium and Asia | probable random mating to<br>NH and PC                                   | 20 | BC/RRIFAGB,<br>2016 |
| Uzbek Game<br>(Kulangi)                        | UG             | Uzbekistan                | local Uzbek game chickens                                                                     | probable random mating to<br>YC                                          | 19 | BC/RRIFAGB,<br>2016 |
| Uzbek Game ×<br>Amrock                         | UG × Ar        | Pushkin, Russia           | UG, Ar                                                                                        | F <sub>1</sub> hybrids bred <i>inter se</i>                              | 14 | BC/RRIFAGB,<br>2016 |
| Fancy and Bantam breeds/populations            |                |                           |                                                                                               |                                                                          |    |                     |
| Russian Crested                                | RC             | Russia                    | local chickens                                                                                | probable random mating to<br>other breeds                                | 19 | BC/RRIFAGB,<br>2016 |
| Ukrainian Muffed                               | UM             | Ukraine                   | local chickens                                                                                | probable random mating to<br>other breeds                                | 18 | BC/RRIFAGB,<br>2016 |
| Bantam Mille Fleur                             | BMF            | Southeast Asia,<br>Europe | local chickens                                                                                | a purebred strain                                                        | 20 | BC/RRIFAGB,<br>2016 |
| Brahma Buff                                    | BB             | India, USA                | Cochin, Gray Chittagong (of Malay<br>type)                                                    | a purebred strain                                                        | 20 | BC/RRIFAGB,<br>2016 |

|                               |      |                         |                                                                                                        |                                                                   |    |                  |
|-------------------------------|------|-------------------------|--------------------------------------------------------------------------------------------------------|-------------------------------------------------------------------|----|------------------|
| Brahma Light                  | BL   | India, USA              | Cochin, Gray Chittagong (of Malay type)                                                                | a purebred strain                                                 | 20 | BC/RRIFAGB, 2016 |
| Hamburg Silver Spangled Dwarf | HSSD | Holland, United Kingdom | local North Sea coast chickens, chickens from Ottoman Empire                                           | an inbred strain                                                  | 20 | BC/RRIFAGB, 2016 |
| Poland White-crested Black    | PWB  | Netherlands, Poland?    | Local chickens, Czubatka chickens from Poland                                                          | a purebred strain                                                 | 18 | BC/RRIFAGB, 2016 |
| Silkie White                  | SW   | China, Southeast Asia   | local chickens                                                                                         | a purebred strain                                                 | 19 | BC/RRIFAGB, 2016 |
| Cochin Bantam (Pekin Bantam)  | CB   | China                   | Cochin                                                                                                 | of three varieties (black, mottled, white)                        | 20 | BC/RRIFAGB, 2016 |
| Frizzle                       | F    | South Asia, Europe      | local chickens                                                                                         | various dual purpose breeds mated, with keeping the frizzle trait | 20 | BC/RRIFAGB, 2016 |
| Pavlov Spangled               | PS   | Pushkin, Russia         | extinct old Russian native breed; currently, being restored from FS, Appenzeller, Padovana, SW, Houdan | of two varieties (silver and golden)                              | 20 | BC/RRIFAGB, 2016 |
| Pavlov White                  | PW   | Pushkin, Russia         | extinct old Russian native breed; currently, being restored from FS, Appenzeller, Padovana, SW, Houdan | a purebred strain                                                 | 15 | BC/RRIFAGB, 2016 |

<sup>1</sup> Abbreviations: BC/RRIFAGB, Bioresource Collection/Russian Research Institute of Farm Animal Genetics and Breeding; ARPRTI, All-Russian Poultry Research and Technological Institute; SPBFS, State Poultry Breeder Farm Smena.

**Table S2.** Phenotypic traits <sup>1,2</sup> in females among the 39 studied chicken gene pool breeds/populations listed in accordance with PCM.

| Breed/population <sup>3</sup>                | Morphometric traits <sup>4</sup> |                |                |                |                |                |                |                |               |               |               |                |               |               | Egg traits <sup>4</sup> |                |
|----------------------------------------------|----------------------------------|----------------|----------------|----------------|----------------|----------------|----------------|----------------|---------------|---------------|---------------|----------------|---------------|---------------|-------------------------|----------------|
|                                              | BW                               | BoL            | BSL            | BNL            | KL             | CG             | CD             | PA             | DSJ           | DHJ           | FL            | TL             | ShL           | SG            | EP                      | EW             |
| Egg-type and related breeds/populations      |                                  |                |                |                |                |                |                |                |               |               |               |                |               |               |                         |                |
| LLB                                          | 2.02<br>±0.05                    | 15.04<br>±0.25 | 16.32<br>±0.15 | 32.01<br>±0.35 | 9.27<br>±0.11  | 31.64<br>±0.40 | 10.29<br>±0.20 | 75.90<br>±1.10 | 6.05<br>±0.08 | 7.78<br>±0.14 | 8.16<br>±0.10 | 11.92<br>±0.19 | 8.59<br>±0.08 | 3.68<br>±0.06 | 166.00<br>±4.00         | 58.00<br>±0.25 |
| RWG                                          | 1.95<br>±0.07                    | 15.55<br>±0.33 | 16.00<br>±0.17 | 32.47<br>±0.40 | 9.35<br>±0.24  | 30.19<br>±0.36 | 10.75<br>±0.27 | 78.55<br>±2.28 | 5.75<br>±0.14 | 7.64<br>±0.27 | 8.68<br>±0.21 | 12.76<br>±0.25 | 8.87<br>±0.13 | 3.56<br>±0.06 | 205.00<br>±5.00         | 55.50<br>±0.50 |
| AB                                           | 2.07<br>±0.07                    | 15.87<br>±0.20 | 16.57<br>±0.17 | 32.24<br>±0.33 | 10.05<br>±0.19 | 32.00<br>±0.54 | 10.46<br>±0.17 | 74.42<br>±1.15 | 6.76<br>±0.15 | 7.93<br>±0.11 | 8.64<br>±0.15 | 12.72<br>±0.18 | 8.70<br>±0.12 | 3.85<br>±0.07 | 165.00<br>±5.00         | 57.00<br>±1.00 |
| Ar                                           | 2.17<br>±0.11                    | 15.65<br>±0.30 | 16.10<br>±0.29 | 33.17<br>±0.41 | 10.07<br>±0.37 | 31.48<br>±0.71 | 10.87<br>±0.19 | 76.64<br>±1.76 | 6.89<br>±0.18 | 8.32<br>0.27  | 8.39<br>±0.18 | 13.07<br>±0.22 | 9.04<br>±0.11 | 3.65<br>±0.08 | 162.50<br>±2.50         | 59.50<br>±0.50 |
| NN                                           | 1.96<br>±0.12                    | 14.56<br>±0.32 | 16.52<br>±0.21 | 30.78<br>±0.54 | 9.76<br>±0.29  | 30.62<br>±0.61 | 10.42<br>±0.27 | 72.0<br>±2.1   | 6.07<br>±0.18 | 8.08<br>±0.21 | 8.44<br>±0.19 | 12.54<br>±0.19 | 8.92<br>±0.16 | 3.63<br>±0.09 | 127.50<br>±2.50         | 57.50<br>±0.50 |
| F                                            | 1.85<br>±0.03                    | 15.22<br>±0.23 | 16.53<br>±0.33 | 31.88<br>±0.34 | 9.60<br>±0.16  | 28.64<br>±0.37 | 10.18<br>±0.14 | 71.7<br>±1.9   | 6.04<br>±0.13 | 5.30<br>±0.10 | 8.25<br>±0.26 | 12.84<br>±0.12 | 8.87<br>±0.34 | 3.74<br>±0.06 | 127.50<br>±2.50         | 59.00<br>±1.00 |
| Dual purpose and related breeds/populations  |                                  |                |                |                |                |                |                |                |               |               |               |                |               |               |                         |                |
| Egg-meat type and related breeds/populations |                                  |                |                |                |                |                |                |                |               |               |               |                |               |               |                         |                |
| MB                                           | 2.57<br>±0.14                    | 15.71<br>±0.27 | 18.50<br>±0.27 | 34.36<br>±0.37 | 10.84<br>±0.21 | 35.10<br>±0.63 | 12.14<br>±0.31 | 79.00<br>±1.10 | 6.93<br>±0.19 | 9.22<br>±0.31 | 9.55<br>±0.27 | 13.73<br>±0.22 | 10.1<br>±0.14 | 4.07<br>±0.05 | 165.00<br>±5.00         | 55.50<br>±1.50 |
| RIR                                          | 2.35<br>±0.09                    | 16.73<br>±0.23 | 16.98<br>±0.25 | 33.47<br>±0.38 | 9.64<br>±0.27  | 34.26<br>±0.61 | 11.11<br>±0.14 | 86.18<br>±2.08 | 7.15<br>±0.15 | 8.27<br>±0.16 | 9.15<br>±0.25 | 12.92<br>±0.39 | 8.99<br>±0.16 | 4.17<br>±0.07 | 175.00<br>±5.00         | 59.50<br>±0.50 |
| LGG                                          | 2.33<br>±0.07                    | 15.72<br>±0.22 | 17.34<br>±0.18 | 33.60<br>±0.56 | 10.33<br>±0.15 | 31.30<br>±0.29 | 11.08<br>±0.17 | 84.70<br>±1.10 | 6.59<br>±0.11 | 8.87<br>±0.24 | 9.32<br>±0.23 | 12.74<br>±0.25 | 9.38<br>±0.16 | 3.92<br>±0.06 | 182.50<br>±2.50         | 59.00<br>±1.00 |
| PB                                           | 2.44<br>±0.13                    | 16.27<br>±0.31 | 18.02<br>±0.27 | 34.56<br>±0.69 | 10.41<br>±0.20 | 32.24<br>±0.52 | 11.35<br>±0.23 | 78.80<br>±1.60 | 6.70<br>±0.21 | 8.51<br>±0.16 | 9.28<br>±0.21 | 13.54<br>±0.24 | 9.78<br>±0.14 | 4.12<br>±0.05 | 165.00<br>±5.00         | 61.50<br>±0.50 |
| SL                                           | 2.54<br>±0.10                    | 16.96<br>±0.25 | 17.23<br>±0.24 | 33.31<br>±0.53 | 10.13<br>±0.17 | 33.51<br>±0.78 | 10.91<br>±0.22 | 82.67<br>±2.11 | 7.19<br>±0.10 | 7.53<br>±0.23 | 9.16<br>±0.16 | 13.33<br>±0.27 | 9.29<br>±0.17 | 3.84<br>±0.05 | 157.50<br>±2.50         | 60.00<br>±1.00 |
| FS                                           | 2.34<br>±0.11                    | 16.00<br>±0.24 | 17.62<br>±0.28 | 33.51<br>±0.45 | 11.60<br>±0.28 | 35.38<br>±0.65 | 11.25<br>±0.29 | 75.9<br>±1.0   | 6.75<br>±0.13 | 8.68<br>±0.21 | 9.51<br>±0.28 | 13.33<br>±0.25 | 9.29<br>±0.19 | 4.27<br>±0.10 | 132.50<br>±2.50         | 57.00<br>±1.00 |

|                                              |               |                |                |                |                |                |                |                |               |               |                |                |                |               |                  |                |
|----------------------------------------------|---------------|----------------|----------------|----------------|----------------|----------------|----------------|----------------|---------------|---------------|----------------|----------------|----------------|---------------|------------------|----------------|
| RC                                           | 2.15<br>±0.07 | 14.5<br>±0.56  | 17.33<br>±0.27 | 34.20<br>±0.51 | 10.52<br>±0.13 | 33.9<br>±0.35  | 11.55<br>±0.20 | 77.9<br>±2.7   | 7.28<br>±0.11 | 8.23<br>±0.20 | 8.83<br>±0.18  | 13.39<br>±0.29 | 9.42<br>±0.19  | 3.93<br>±0.05 | 151.50<br>±3.50  | 58.50<br>±1.50 |
| BB                                           | 2.21<br>±0.12 | 17.15<br>±0.33 | 17.84<br>±0.30 | 34.27<br>±0.54 | 11.45<br>±0.21 | 32.73<br>±0.58 | 11.11<br>±0.27 | 70.27<br>±1.34 | 6.86<br>±0.13 | 7.48<br>±0.31 | 10.11<br>±0.22 | 14.17<br>±0.22 | 9.57<br>±0.26  | 4.28<br>±0.14 | 128.00<br>±3.00  | 56.00<br>±1.00 |
| BL                                           | 2.18<br>±0.07 | 16.37<br>±0.17 | 17.41<br>±0.18 | 32.56<br>±0.34 | 11.17<br>±0.20 | 32.07<br>±0.33 | 11.38<br>±0.26 | 71.50<br>±1.14 | 7.02<br>±0.16 | 8.01<br>±0.15 | 9.32<br>±0.14  | 13.74<br>±0.14 | 9.26<br>±0.19  | 3.77<br>±0.11 | 131.50<br>±1.50  | 58.00<br>±1.00 |
| Meat-egg type and related breeds/populations |               |                |                |                |                |                |                |                |               |               |                |                |                |               |                  |                |
| ZS                                           | 2.61<br>±0.10 | 15.59<br>±0.32 | 17.99<br>±0.25 | 34.39<br>±0.47 | 10.91<br>±0.22 | 34.21<br>±0.56 | 11.37<br>±0.32 | 83.80<br>±1.80 | 7.32<br>±0.16 | 9.41<br>±0.19 | 9.60<br>±0.17  | 13.86<br>±0.15 | 9.25<br>±0.14  | 4.00<br>±0.04 | 170.00<br>±10.00 | 58.50<br>±0.50 |
| Pu                                           | 2.50<br>±0.08 | 15.79<br>±0.19 | 18.23<br>±0.20 | 34.53<br>±0.42 | 10.95<br>±0.16 | 31.55<br>±.35  | 11.38<br>±0.13 | 81.20<br>±1.50 | 6.72<br>±0.08 | 8.66<br>±0.25 | 9.77<br>±0.34  | 13.73<br>±0.26 | 10.16<br>±0.10 | 3.85<br>±0.06 | 215.00<br>±5.00  | 61.50<br>±0.50 |
| LMF                                          | 2.25<br>±0.06 | 15.67<br>±0.28 | 17.65<br>±0.26 | 32.73<br>±0.44 | 10.58<br>±0.14 | 31.53<br>±0.35 | 10.73<br>±0.19 | 77.20<br>±1.60 | 6.80<br>±0.10 | 8.22<br>±0.12 | 9.03<br>±0.23  | 13.81<br>±0.27 | 9.52<br>±0.15  | 3.98<br>±0.06 | 185.00<br>±5.00  | 61.50<br>±0.50 |
| NH                                           | 2.38<br>±0.06 | 16.29<br>±0.29 | 17.93<br>±0.19 | 34.78<br>±0.22 | 10.72<br>±0.13 | 33.97<br>±0.46 | 11.25<br>±0.16 | 82.70<br>±1.10 | 7.26<br>±0.17 | 9.27<br>±0.21 | 8.88<br>±0.15  | 13.25<br>±0.44 | 10.01<br>±0.33 | 4.13<br>±0.05 | 205.00<br>±5.00  | 59.50<br>±0.50 |
| ABS                                          | 2.78<br>±0.08 | 16.35<br>±0.21 | 18.48<br>±0.18 | 35.54<br>±0.38 | 11.01<br>±0.27 | 34.77<br>±0.43 | 12.17<br>±0.31 | 79.10<br>±1.20 | 7.45<br>±0.14 | 9.58<br>±0.17 | 9.68<br>±0.13  | 14.06<br>±0.23 | 10.03<br>±0.15 | 4.13<br>±0.10 | 157.50<br>±2.50  | 59.00<br>±1.00 |
| AoB                                          | 2.81<br>±0.07 | 16.15<br>±0.42 | 17.72<br>±0.30 | 35.11<br>±0.40 | 10.53<br>±0.18 | 34.28<br>±0.54 | 11.92<br>±0.21 | 88.7<br>±1.4   | 6.91<br>±0.16 | 9.43<br>±0.38 | 9.33<br>±0.15  | 14.06<br>±0.09 | 9.94<br>±0.16  | 4.13<br>±0.06 | 157.50<br>±2.50  | 59.00<br>±1.00 |
| Pm                                           | 2.72<br>±0.14 | 16.70<br>±0.31 | 17.85<br>±0.25 | 35.39<br>±0.46 | 10.85<br>±0.17 | 35.11<br>±0.62 | 11.17<br>±0.18 | 75.4<br>±2.1   | 7.27<br>±0.15 | 8.76<br>±0.25 | 9.80<br>±0.15  | 14.05<br>±0.15 | 10.12<br>±0.15 | 4.12<br>±0.07 | 152.00<br>±3.00  | 58.50<br>±0.50 |
| PRB                                          | 2.46<br>±0.09 | 15.80<br>±0.26 | 18.47<br>±0.22 | 33.61<br>±0.67 | 10.30<br>±0.26 | 31.45<br>±0.43 | 10.34<br>±0.23 | 77.55<br>±1.16 | 6.78<br>±0.21 | 9.46<br>±0.66 | 9.95<br>±0.42  | 12.85<br>±0.50 | 9.73<br>±0.17  | 4.02<br>±0.03 | 162.50<br>±2.50  | 61.50<br>±0.50 |
| PC                                           | 2.30<br>±0.06 | 16.65<br>±0.23 | 19.13<br>±0.20 | 34.14<br>±0.55 | 11.25<br>±0.19 | 31.80<br>±0.15 | 11.48<br>±0.19 | 76.09<br>±1.48 | 6.98<br>±0.15 | 8.56<br>±0.13 | 9.92<br>±0.19  | 14.46<br>±0.18 | 10.41<br>±0.12 | 4.16<br>±0.09 | 142.50<br>±2.50  | 60.00<br>±1.00 |
| Ts                                           | 2.38<br>±0.04 | 15.73<br>±0.22 | 18.03<br>±0.12 | 34.38<br>±0.37 | 11.46<br>±0.10 | 31.89<br>±0.25 | 11.90<br>±0.15 | 83.1<br>±1.3   | 6.77<br>±0.09 | 8.74<br>±0.12 | 9.60<br>±0.13  | 14.17<br>±0.10 | 10.22<br>±0.09 | 4.06<br>±0.04 | 147.50<br>±2.50  | 60.50<br>±1.50 |
| YC                                           | 2.87<br>±0.10 | 16.01<br>±0.50 | 18.27<br>±0.27 | 35.98<br>±0.63 | 10.98<br>±0.18 | 32.43<br>±0.08 | 12.07<br>±0.14 | 78.4<br>±3.6   | 6.43<br>±0.19 | 9.06<br>±0.14 | 9.34<br>±0.37  | 13.97<br>±0.43 | 10.67<br>±0.10 | 4.15<br>±0.08 | 137.50<br>±2.50  | 61.00<br>±1.00 |
| OM                                           | 2.45<br>±0.11 | 16.30<br>±0.30 | 18.97<br>±0.27 | 36.05<br>±0.54 | 10.80<br>±0.14 | 32.33<br>±0.52 | 11.38<br>±0.25 | 75.6<br>±0.8   | 7.16<br>±0.11 | 8.26<br>±0.21 | 10.15<br>±0.27 | 14.19<br>±0.21 | 10.13<br>±0.16 | 4.08<br>±0.04 | 132.50<br>±2.50  | 56.00<br>±1.00 |
| UM                                           | 2.68<br>±0.10 | 16.29<br>±0.33 | 18.34<br>±0.20 | 34.16<br>±0.40 | 11.10<br>±0.36 | 35.4<br>±0.74  | 12.08<br>±0.19 | 78.3<br>±1.4   | 7.24<br>±0.18 | 9.22<br>±0.29 | 9.62<br>±0.20  | 14.00<br>±0.16 | 10.00<br>±0.15 | 4.03<br>±0.09 | 137.50<br>±2.50  | 57.00<br>±1.00 |
| Meat-type and related breeds/populations     |               |                |                |                |                |                |                |                |               |               |                |                |                |               |                  |                |

|                                       |               |                |                |                |                |                |                |                |                |               |                |                |                |               |                 |                |
|---------------------------------------|---------------|----------------|----------------|----------------|----------------|----------------|----------------|----------------|----------------|---------------|----------------|----------------|----------------|---------------|-----------------|----------------|
| WC × (BL × SL)                        | 5.63<br>±0.19 | 19.62<br>±0.26 | 21.21<br>±0.19 | 35.07<br>±0.34 | 14.34<br>±0.22 | 14.32<br>±0.48 | 11.78<br>±0.19 | 124.5<br>±2.5  | 10.50<br>±0.13 | 9.15<br>±0.22 | 10.20<br>±0.17 | 15.22<br>±0.16 | 11.32<br>±0.14 | 5.13<br>±0.04 | 157.50<br>±2.50 | 59.50<br>±0.50 |
| Game breeds/populations               |               |                |                |                |                |                |                |                |                |               |                |                |                |               |                 |                |
| MG                                    | 2.94<br>±0.09 | 16.73<br>±0.21 | 18.77<br>±0.15 | 36.23<br>±0.49 | 11.45<br>±0.20 | 35.12<br>±0.46 | 12.24<br>±0.19 | 76.3<br>±0.9   | 7.24<br>±0.12  | 9.61<br>±0.17 | 10.31<br>±0.21 | 14.83<br>±0.14 | 10.63<br>±0.11 | 4.30<br>±0.02 | 135.00<br>±5.00 | 59.50<br>±1.50 |
| UG                                    | 2.48<br>±0.10 | 17.28<br>±0.34 | 19.22<br>±0.17 | 37.17<br>±0.37 | 11.23<br>±0.26 | 34.82<br>±0.29 | 12.04<br>±0.19 | 78.8<br>±1.8   | 7.48<br>±0.11  | 9.67<br>±0.19 | 10.08<br>±0.08 | 14.52<br>±0.16 | 10.85<br>±0.15 | 4.55<br>±0.04 | 102.50<br>±2.50 | 60.00<br>±1.00 |
| Fancy breeds/populations              |               |                |                |                |                |                |                |                |                |               |                |                |                |               |                 |                |
| PWB                                   | 1.60<br>±0.08 | 13.74<br>±0.33 | 15.00<br>±0.25 | 29.70<br>±0.58 | 9.06<br>±0.23  | 30.30<br>±0.72 | 9.91<br>±0.21  | 71.5<br>±1.5   | 6.09<br>±0.16  | 7.11<br>±0.16 | 7.91<br>±0.16  | 11.49<br>±0.24 | 7.89<br>±0.16  | 3.20<br>±0.09 | 123.00<br>±3.00 | 55.00<br>±1.00 |
| PS                                    | 1.52<br>±0.07 | 13.72<br>±0.29 | 14.81<br>±0.25 | 29.23<br>±0.42 | 8.74<br>±0.25  | 28.94<br>±0.45 | 9.70<br>±0.39  | 73.8<br>±1.6   | 5.99<br>±0.09  | 7.12<br>±0.26 | 7.66<br>±0.25  | 11.27<br>±0.21 | 7.54<br>±0.30  | 3.52<br>±0.09 | 127.50<br>±2.50 | 52.00<br>±1.00 |
| PW                                    | 1.67<br>±0.05 | 13.40<br>±0.19 | 14.89<br>±0.29 | 29.88<br>±0.47 | 9.02<br>±0.11  | 30.36<br>±0.31 | 10.06<br>±0.22 | 76.5<br>±1.8   | 5.93<br>±0.06  | 7.05<br>±0.15 | 7.52<br>±0.19  | 11.72<br>±0.18 | 7.56<br>±0.20  | 3.46<br>±0.09 | 120.50<br>±2.50 | 48.00<br>±1.00 |
| Bantam and related breeds/populations |               |                |                |                |                |                |                |                |                |               |                |                |                |               |                 |                |
| RWD                                   | 1.09±0.07     | 12.57±<br>0.20 | 13.44<br>±0.22 | 25.14±<br>0.28 | 8.58±<br>0.11  | 23.8±<br>0.16  | 8.32±<br>0.23  | 71.25<br>2.6±  | 4.77±<br>0.16  | 5.22±<br>0.16 | 6.02<br>±0.14  | 9.56±<br>0.12  | 6.42±<br>0.1   | 3.0±<br>0.07  | 162.50<br>±2.50 | 57.50<br>±0.50 |
| BMF                                   | 0.88<br>±0.03 | 11.46<br>±0.26 | 12.42<br>±0.23 | 25.53<br>±0.42 | 7.96<br>±0.15  | 22.43<br>±0.30 | 7.91<br>±0.14  | 73.18<br>±1.31 | 4.77<br>±0.08  | 5.32<br>±0.13 | 6.23<br>±0.17  | 9.07<br>±0.14  | 6.16<br>±0.12  | 2.85<br>±0.04 | 123.50<br>±3.50 | 47.00<br>±1.00 |
| HSSD                                  | 1.16<br>±0.04 | 12.67<br>±0.21 | 14.21<br>±0.15 | 27.48<br>±0.49 | 8.57<br>±0.17  | 27.30<br>±0.45 | 9.01<br>±0.24  | 75.7<br>±1.1   | 5.45<br>±0.12  | 7.17<br>±0.12 | 6.84<br>±0.13  | 9.98<br>±0.16  | 7.26<br>±0.13  | 2.94<br>±0.04 | 122.00<br>±2.00 | 48.50<br>±0.50 |
| SW                                    | 0.86<br>±0.03 | 11.62<br>±0.22 | 12.58<br>±0.13 | 23.96<br>±0.42 | 7.49<br>±0.12  | 23.48<br>±0.39 | 7.88<br>±0.09  | 75.55<br>±2.51 | 4.74<br>±0.10  | 5.59<br>±0.22 | 6.20<br>±0.22  | 9.45<br>±0.16  | 6.19<br>±0.18  | 3.22<br>±0.03 | 81.50<br>±1.50  | 39.00<br>±1.00 |
| CB                                    | 0.76<br>±0.02 | 10.25<br>±0.24 | 10.81<br>±0.26 | 22.43<br>±0.50 | 6.92<br>±0.11  | 22.12<br>±0.38 | 7.51<br>±0.12  | 62.73<br>±0.90 | 4.45<br>±0.07  | 4.89<br>±0.10 | 6.00<br>±0.20  | 7.71<br>±0.17  | 4.69<br>±0.09  | 2.56<br>±0.05 | 133.00<br>±3.00 | 57.50<br>±0.50 |

<sup>1</sup> BW, body weight (kg); BoL, body length (cm); BSL, body slanting length (cm); BNL, body and neck length (cm); KL, keel length (cm); CG, chest girth (cm); CD, chest depth (cm); PA, pectoral angle (°); DSJ, distance between shoulder joints (cm); DHJ, distance between hip joints (cm); FL, femur length (cm); TL, tibia length (cm); ShL, shank length (cm); SG, shank girth (cm); EP, 52-week egg production (eggs); EW, egg weight (g).

<sup>2</sup> The table values represent mean ± standard error and were obtained as a result of own measurements performed in mature females.

<sup>3</sup> Abbreviations for breed names are given in accordance with Table S1.

<sup>4</sup> According to the information reported in: [Fundamental Research Program of State Academies of Sciences for 2013–2020. Inventory and development of the Genetic Collection of Rare and Endangered Chicken Breeds: research report (final): Direction of FSI: Zootechnics. 156 / Russian Research Institute of Farm Animal Genetics and Breeding – Branch of the L. K. Ernst Federal Science Center for Animal Husbandry; Supervisor O. I. Stanishevskaya. St. Petersburg–Pushkin, 2017; pp. 71–72; 124 p.; SR No. AAAA-A17-11121950099-1; Inv. No. 1; ISSA FASO Project No. 0600-2017-0011.

**Table S3.** Phenotypic traits <sup>1,2</sup> in males among the 39 studied chicken gene pool breeds/populations listed in accordance with PCM.

| Breed/population <sup>3</sup>                | Morphometric traits <sup>4</sup> |                |                |                |                |                |                |                |               |                |                |                |                |               |
|----------------------------------------------|----------------------------------|----------------|----------------|----------------|----------------|----------------|----------------|----------------|---------------|----------------|----------------|----------------|----------------|---------------|
|                                              | BW                               | BoL            | BSL            | BNL            | KL             | CG             | CD             | PA             | DSJ           | DHJ            | FL             | TL             | ShL            | SG            |
| Egg-type and related breeds/populations      |                                  |                |                |                |                |                |                |                |               |                |                |                |                |               |
| LLB                                          | 2.79<br>±0.16                    | 17.40<br>±0.25 | 19.73<br>±0.43 | 34.03<br>±1.65 | 13.03<br>±0.66 | 34.77<br>±0.97 | 11.30<br>±0.93 | 76.70<br>±1.9  | 7.53<br>±0.22 | 9.50<br>±0.35  | 10.00<br>±0.44 | 15.03<br>±0.18 | 11.07<br>±0.24 | 4.73<br>±0.09 |
| RWG                                          | 2.37<br>±0.08                    | 16.86<br>±0.47 | 17.82<br>±0.32 | 34.40<br>±0.85 | 11.30<br>±0.26 | 34.40<br>±0.46 | 10.52<br>±0.51 | 79.60<br>±1.44 | 7.02<br>±0.19 | 8.94<br>±0.44  | 9.66<br>±0.43  | 14.82<br>±0.37 | 10.44<br>±0.13 | 4.36<br>±0.09 |
| AB                                           | 2.68<br>±0.10                    | 18.64<br>±0.40 | 19.28<br>±0.47 | 33.5<br>±0.61  | 12.04<br>±0.44 | 36.4<br>±0.68  | 12.34<br>±0.37 | 70.4<br>±2.48  | 7.66<br>±0.13 | 8.58<br>±0.14  | 10.3<br>±0.15  | 15.7<br>±0.30  | 11.22<br>±0.25 | 4.72<br>±0.10 |
| Ar                                           | 2.61<br>±0.10                    | 17.82<br>±0.54 | 18.80<br>±0.22 | 35.68<br>±0.21 | 12.20<br>±0.26 | 33.04<br>±0.37 | 11.86<br>±0.33 | 78.40<br>±2.66 | 7.78<br>±0.12 | 8.56<br>±0.19  | 9.88<br>±0.26  | 15.70<br>±0.10 | 10.90<br>±0.19 | 4.46<br>±0.07 |
| NN                                           | 2.78<br>±0.07                    | 16.76<br>±0.75 | 19.22<br>±0.23 | 33.56<br>±0.54 | 11.66<br>±0.34 | 36.10<br>±1.10 | 12.16<br>±0.38 | 77.2<br>±1.9   | 7.96<br>±0.10 | 8.94<br>±0.25  | 10.34<br>±0.22 | 15.82<br>±0.25 | 11.16<br>±0.25 | 4.72<br>±0.12 |
| F                                            | 2.74<br>±0.02                    | 16.58<br>±0.17 | 17.32<br>±0.26 | 35.90<br>±0.41 | 11.3<br>±0.33  | 32.94<br>±0.25 | 10.94<br>±0.60 | 73.15<br>±3.57 | 6.92<br>±0.12 | 6.78<br>±0.21  | 9.21<br>±0.26  | 55<br>±0.21    | 10.5<br>±0.22  | 4.19<br>±0.22 |
| Dual purpose and related breeds/populations  |                                  |                |                |                |                |                |                |                |               |                |                |                |                |               |
| Egg-meat type and related breeds/populations |                                  |                |                |                |                |                |                |                |               |                |                |                |                |               |
| MB                                           | 2.56<br>±0.15                    | 17.63<br>±0.86 | 20.43<br>±0.55 | 35.03<br>±0.58 | 12.13<br>±0.38 | 35.70<br>±1.80 | 12.90<br>±0.26 | 83.70<br>±0.70 | 7.93<br>±0.15 | 9.27<br>±0.35  | 11.93<br>±0.99 | 16.30<br>±0.01 | 12.60<br>±0.31 | 4.97<br>±0.20 |
| RIR                                          | 2.99<br>±0.09                    | 18.32<br>±0.32 | 19.70<br>±0.28 | 36.28<br>±0.69 | 12.42<br>±0.27 | 38.20<br>±0.33 | 12.52<br>±0.12 | 78.00<br>±1.97 | 8.06<br>±0.22 | 9.54<br>±0.30  | 10.62<br>±0.28 | 16.04<br>±0.26 | 11.18<br>±0.32 | 4.92<br>±0.12 |
| LGG                                          | 3.13<br>±0.12                    | 18.99<br>±0.35 | 20.49<br>±0.38 | 38.29<br>±0.86 | 12.12<br>±0.18 | 36.68<br>±0.62 | 12.40<br>±0.24 | 77.2<br>±1.80  | 8.16<br>±0.18 | 9.98<br>±0.22  | 10.59<br>±0.15 | 16.00<br>±0.18 | 11.85<br>±0.22 | 4.89<br>±0.12 |
| PB                                           | 3.01<br>±0.08                    | 17.70<br>±0.12 | 20.18<br>±0.29 | 36.20<br>±0.91 | 11.65<br>±0.52 | 37.20<br>±0.98 | 12.80<br>±0.32 | 80.3<br>±2.80  | 8.13<br>±0.29 | 9.03<br>±0.32  | 10.90<br>±0.11 | 15.95<br>±0.30 | 11.98<br>±0.41 | 5.23<br>±0.06 |
| SL                                           | 2.83<br>±0.15                    | 18.54<br>±0.34 | 19.78<br>±0.47 | 36.56<br>±0.80 | 12.28<br>±0.41 | 36.24<br>±0.85 | 11.80<br>±0.45 | 79.00<br>±5.29 | 8.48<br>±0.25 | 9.38<br>±0.43  | 10.56<br>±0.52 | 16.02<br>±0.48 | 11.64<br>±0.51 | 4.66<br>±0.16 |
| FS                                           | 2.94<br>±0.13                    | 16.23<br>±0.34 | 19.60<br>±0.15 | 38.30<br>±0.40 | 11.87<br>±0.32 | 37.47<br>±0.19 | 12.47<br>±0.44 | 76.7<br>±2.7   | 7.93<br>±0.19 | 10.07<br>±0.52 | 10.90<br>±0.46 | 16.17<br>±0.44 | 11.90<br>±0.49 | 5.07<br>±0.09 |
| RC                                           | 3.04<br>±0.09                    | 17.55<br>±0.90 | 20.13<br>±0.49 | 37.95<br>±0.92 | 12.40<br>±0.82 | 37.3<br>±0.82  | 12.38<br>±0.74 | 84.8<br>±2.8   | 8.53<br>±0.23 | 9.83<br>±0.37  | 10.58<br>±0.32 | 16.05<br>±0.48 | 12.13<br>±0.18 | 5.13<br>±0.06 |
| BB                                           | 2.73<br>±0.11                    | 19.40<br>±0.69 | 20.26<br>±0.45 | 37.58<br>±1.64 | 13.14<br>±0.33 | 35.74<br>±0.82 | 11.88<br>±0.33 | 67.00<br>±2.77 | 7.92<br>±0.15 | 8.16<br>±0.39  | 11.70<br>±0.38 | 16.60<br>±0.46 | 12.02<br>±0.30 | 4.72<br>±0.16 |
| BL                                           | 2.85                             | 18.76          | 19.78          | 37.88          | 12.54          | 35.22          | 11.38          | 76.60          | 8.22          | 8.88           | 10.78          | 16.68          | 11.74          | 5.22          |



|                                                     |               |                |                |                |                |                |                |               |                |                |                |                |                |               |
|-----------------------------------------------------|---------------|----------------|----------------|----------------|----------------|----------------|----------------|---------------|----------------|----------------|----------------|----------------|----------------|---------------|
|                                                     | ±0.11         | ±0.40          | ±0.34          | ±0.50          | ±0.18          | ±0.49          | ±0.35          | ±3.23         | ±0.15          | ±0.26          | ±0.18          | ±0.30          | ±0.19          | ±0.18         |
| <i>Meat-egg type and related breeds/populations</i> |               |                |                |                |                |                |                |               |                |                |                |                |                |               |
| ZS                                                  | 3.34<br>±0.10 | 19.00<br>±0.43 | 20.66<br>±0.32 | 37.47<br>±0.75 | 12.70<br>±0.24 | 37.59<br>±0.51 | 12.57<br>±0.14 | 83.0<br>±2.3  | 8.61<br>±0.13  | 10.51<br>±0.46 | 11.09<br>±0.25 | 16.66<br>±0.37 | 11.87<br>±0.14 | 5.09<br>±0.06 |
| Pu                                                  | 3.44<br>±0.11 | 17.44<br>±0.39 | 21.52<br>±0.30 | 40.71<br>±0.58 | 12.70<br>±0.16 | 36.52<br>±0.38 | 13.07<br>±0.29 | 83.7<br>±3.1  | 9.04<br>±0.54  | 10.18<br>±0.18 | 10.95<br>±0.19 | 17.06<br>±0.21 | 13.04<br>±0.15 | 5.10<br>±0.08 |
| LMF                                                 | 3.20<br>±0.14 | 17.96<br>±0.78 | 20.64<br>±0.22 | 36.62<br>±0.68 | 13.18<br>±0.30 | 36.54<br>±0.17 | 12.90<br>±0.38 | 79.6<br>±3.60 | 8.44<br>±0.27  | 9.36<br>±0.35  | 11.48<br>±0.24 | 17.10<br>±0.49 | 12.74<br>±0.23 | 5.30<br>±0.10 |
| NH                                                  | 3.24<br>±0.24 | 17.70<br>±0.20 | 21.45<br>±0.25 | 40.30<br>±0.01 | 12.50<br>±0.70 | 37.20<br>±0.70 | 13.15<br>±0.15 | 80.0<br>±5.00 | 9.00<br>±0.10  | 10.80<br>±0.00 | 10.95<br>±0.35 | 17.45<br>±0.75 | 12.55<br>±0.35 | 5.05<br>±0.25 |
| ABS                                                 | 3.18<br>±0.14 | 18.33<br>±0.58 | 19.93<br>±0.34 | 38.40<br>±0.84 | 12.97<br>±0.58 | 40.50<br>±0.81 | 12.77<br>±1.16 | 79.7<br>±1.7  | 8.50<br>±0.44  | 10.13<br>±0.69 | 11.77<br>±0.37 | 16.80<br>±0.42 | 12.77<br>±0.38 | 5.33<br>±0.20 |
| AoB                                                 | 3.57<br>±0.09 | 18.90<br>±0.88 | 20.55<br>±0.66 | 39.60<br>±1.57 | 12.08<br>±0.44 | 37.83<br>±0.74 | 12.78<br>±0.31 | 92.8<br>±5.4  | 8.93<br>±0.54  | 9.80<br>±0.23  | 11.48<br>±0.36 | 17.18<br>±0.55 | 12.58<br>±0.20 | 5.03<br>±0.10 |
| Pm                                                  | 3.29<br>±0.22 | 20.20<br>±0.50 | 22.30<br>±0.64 | 42.47<br>±0.82 | 12.90<br>±0.12 | 36.43<br>±0.58 | 12.80<br>±0.32 | 79.0<br>±2.0  | 8.43<br>±0.34  | 10.07<br>±0.47 | 11.40<br>±0.26 | 17.10<br>±0.26 | 12.63<br>±0.35 | 5.40<br>±0.21 |
| PRB                                                 | 3.50<br>±0.07 | 20.50<br>±0.79 | 22.80<br>±0.44 | 41.77<br>±1.46 | 13.10<br>±0.40 | 36.53<br>±0.35 | 12.53<br>±0.37 | 77.3<br>±0.7  | 8.07<br>±0.09  | 9.73<br>±0.27  | 12.57<br>±0.33 | 17.57<br>±0.23 | 13.10<br>±0.12 | 5.40<br>±0.23 |
| PC                                                  | 3.69<br>±0.35 | 19.20<br>±0.70 | 21.33<br>±0.19 | 39.98<br>±0.71 | 13.95<br>±0.61 | 41.13<br>±1.70 | 13.05<br>±0.59 | 79.8<br>±3.4  | 8.90<br>±0.28  | 10.33<br>±0.23 | 11.50<br>±0.24 | 17.63<br>±0.27 | 13.15<br>±0.47 | 5.35<br>±0.13 |
| Ts                                                  | 3.47<br>±0.09 | 19.22<br>±0.32 | 21.57<br>±0.30 | 39.25<br>±0.55 | 13.39<br>±0.24 | 39.00<br>±0.65 | 13.96<br>±0.29 | 79.0<br>±1.8  | 8.87<br>±0.24  | 10.05<br>±0.26 | 11.77<br>±0.23 | 17.06<br>±0.17 | 12.92<br>±0.15 | 5.29<br>±0.11 |
| YC                                                  | 3.62<br>±0.19 | 18.75<br>±0.25 | 20.25<br>±0.05 | 40.10<br>±0.20 | 12.65<br>±0.55 | 38.25<br>±0.25 | 11.95<br>±0.05 | 87.5<br>±4.5  | 9.70<br>±2.30  | 10.55<br>±0.35 | 10.95<br>±0.05 | 16.85<br>±0.05 | 13.00<br>±0.20 | 5.05<br>±0.15 |
| OM                                                  | 3.40<br>±0.18 | 22.43<br>±1.23 | 22.32<br>±0.75 | 42.22<br>±1.19 | 12.82<br>±0.38 | 39.28<br>±1.30 | 12.73<br>±0.38 | 76.7<br>±1.8  | 8.90<br>±0.27  | 9.93<br>±0.37  | 11.88<br>±0.41 | 17.33<br>±0.52 | 12.87±0.41     | 5.33<br>±0.11 |
| UM                                                  | 3.18<br>±0.14 | 18.77<br>±0.98 | 21.33<br>±0.19 | 37.13<br>±0.56 | 13.10<br>±0.17 | 38.03<br>±1.03 | 12.17<br>±0.12 | 81.7<br>±6.4  | 8.70<br>±0.25  | 9.63<br>±0.37  | 11.00<br>±0.59 | 16.37<br>±0.44 | 12.30<br>±0.32 | 4.97<br>±0.27 |
| <i>Meat-type and related breeds/populations</i>     |               |                |                |                |                |                |                |               |                |                |                |                |                |               |
| WC × (BL × SL)                                      | 6.63<br>±0.42 | 22.08<br>±0.34 | 24.16<br>±0.60 | 41.24<br>±0.84 | 16.8<br>±0.79  | 45.56<br>±1.42 | 13.44<br>±0.63 | 180<br>±0.01  | 11.68<br>±0.49 | 10.12<br>±0.48 | 12.44<br>±0.43 | 18.68<br>±0.41 | 13.8<br>±0.06  | 6.46<br>±0.20 |
| <i>Game breeds/populations</i>                      |               |                |                |                |                |                |                |               |                |                |                |                |                |               |
| MG                                                  | 3.89<br>±0.17 | 19.88<br>±0.81 | 22.48<br>±0.66 | 41.78<br>±1.14 | 15.30<br>±1.40 | 40.80<br>±1.30 | 13.68<br>±0.48 | 74.8<br>±2.7  | 9.53<br>±0.23  | 10.65<br>±0.12 | 11.95<br>±0.31 | 18.25<br>±0.43 | 13.68<br>±0.39 | 5.83<br>±0.15 |
| UG                                                  | 3.83          | 20.10          | 23.10          | 43.88          | 13.03          | 40.23          | 12.80          | 77.8          | 9.00           | 10.53          | 12.75          | 19.38          | 14.43          | 5.80          |

|                                       |               |                |                |                |                |                |                |                |               |               |               |                |                |               |
|---------------------------------------|---------------|----------------|----------------|----------------|----------------|----------------|----------------|----------------|---------------|---------------|---------------|----------------|----------------|---------------|
|                                       | ±0.22         | ±1.05          | ±0.27          | ±1.59          | ±0.31          | ±0.43          | ±0.91          | ±1.4           | ±0.15         | ±0.34         | ±0.53         | ±0.28          | ±0.36          | ±0.16         |
| Fancy breeds/populations              |               |                |                |                |                |                |                |                |               |               |               |                |                |               |
| PWB                                   | 2.07<br>±0.05 | 15.70<br>±0.37 | 17.76<br>±0.29 | 33.16<br>±1.48 | 10.93<br>±0.22 | 32.98<br>±0.67 | 10.69<br>±0.23 | 72.0<br>±1.8   | 6.99<br>±0.15 | 8.16<br>±0.18 | 9.14<br>±0.29 | 13.60<br>±0.27 | 10.35<br>±0.18 | 4.09<br>±0.11 |
| PS                                    | 1.96<br>±0.08 | 14.93<br>±0.38 | 16.87<br>±0.26 | 32.77<br>±0.48 | 10.05<br>±0.26 | 33.23<br>±0.70 | 10.42<br>±0.43 | 77.8<br>±2.0   | 7.10<br>±0.10 | 8.45<br>±0.22 | 9.35<br>±0.23 | 13.58<br>±0.19 | 9.38<br>±0.24  | 4.15<br>±0.18 |
| PW                                    | 2.15<br>±0.09 | 16.37<br>±0.34 | 18.02<br>±0.33 | 34.33<br>±0.76 | 10.90<br>±0.42 | 34.40<br>±0.77 | 11.13<br>±0.47 | 78.2<br>±1.9   | 7.47<br>±0.16 | 8.38<br>±0.24 | 9.47<br>±0.21 | 14.63<br>±0.63 | 9.88<br>±0.29  | 4.48<br>±0.19 |
| Bantam and related breeds/populations |               |                |                |                |                |                |                |                |               |               |               |                |                |               |
| RWD                                   | 1.36<br>±0.05 | 13.62<br>±0.28 | 14.49<br>±0.34 | 28.36<br>±0.19 | 9.6<br>±0.19   | 27.68<br>±0.67 | 9.52<br>±0.15  | 64.0<br>±3.7   | 6.08<br>±0.16 | 5.58<br>±0.24 | 7.72<br>±0.44 | 11.42<br>±0.18 | 8.22<br>±0.32  | 3.98<br>±0.19 |
| BMF                                   | 1.16<br>±0.03 | 13.18<br>±0.42 | 14.83<br>±0.23 | 29.58<br>±1.90 | 9.40<br>±0.29  | 25.48<br>±0.38 | 8.78<br>±0.28  | 77.75<br>±4.40 | 5.45<br>±0.12 | 6.13<br>±0.33 | 7.68<br>±0.27 | 11.15<br>±0.17 | 8.00<br>±0.17  | 3.53<br>±0.08 |
| HSSD                                  | 1.46<br>±0.08 | 14.05<br>±0.26 | 15.35<br>±0.33 | 30.59<br>±0.51 | 9.25<br>±0.29  | 29.03<br>±0.50 | 9.46<br>±0.33  | 73.6<br>±1.50  | 6.56<br>±0.20 | 7.36<br>±0.32 | 8.03<br>±0.18 | 11.63<br>±0.23 | 8.79<br>±0.22  | 3.69<br>±0.06 |
| SW                                    | 1.16<br>±0.07 | 13.10<br>±0.33 | 14.38<br>±0.29 | 27.52<br>±0.89 | 9.14<br>±0.28  | 25.70<br>±0.58 | 9.18<br>±0.15  | 70.20<br>±2.33 | 5.62<br>±0.19 | 6.88<br>±0.31 | 7.36<br>±0.29 | 11.54<br>±0.19 | 7.66<br>±0.14  | 3.82<br>±0.13 |
| CB                                    | 0.98<br>±0.04 | 11.62<br>±0.40 | 12.62<br>±0.47 | 25.34<br>±0.43 | 8.28<br>±0.27  | 23.90<br>±0.55 | 8.16<br>±0.13  | 61.60<br>±0.81 | 5.30<br>±0.17 | 5.50<br>±0.26 | 7.30<br>±0.21 | 9.42<br>±0.30  | 5.86<br>±0.34  | 3.14<br>±0.15 |

<sup>1</sup> BW, body weight (kg); BoL, body length (cm); BSL, body slanting length (cm); BNL, body and neck length (cm); KL, keel length (cm); CG, chest girth (cm); CD, chest depth (cm); PA, pectoral angle (°); DSJ, distance between shoulder joints (cm); DHJ, distance between hip joints (cm); FL, femur length (cm); TL, tibia length (cm); ShL, shank length (cm); SG, shank girth (cm); EP, 52-week egg production (eggs); EW, egg weight (g).

<sup>2</sup> The table values represent mean ± standard error and were obtained as a result of own measurements performed in mature males.

<sup>3</sup> Abbreviations for breed names are given in accordance with Table S1.

<sup>4</sup> According to the information reported in: [Fundamental Research Program of State Academies of Sciences for 2013–2020. Inventory and development of the Genetic Collection of Rare and Endangered Chicken Breeds: research report (final): Direction of FSI: Zootechnics. 156 / Russian Research Institute of Farm Animal Genetics and Breeding – Branch of the L. K. Ernst Federal Science Center for Animal Husbandry; Supervisor O. I. Stanishevskaya. St. Petersburg–Pushkin, 2017; pp. 71–72; 124 p.; SR No. AAAA-A17-11121950099-1; Inv. No. 1; ISSA FASO Project No. 0600-2017-0011.

**Table S4.** Frequency distribution of genotypes for five SNPs at the *NCAPG-LCORL* locus on GGA4 among the 49 studied chicken gene pool breeds/populations listed in accordance with PCM.

| Breed/population <sup>1</sup>                       | GGaluGA265969 |      |      | GGaluGA265966 |      |      | rs14491017 |      |      | rs14491028 |      |      | rs15619223 |      |      |
|-----------------------------------------------------|---------------|------|------|---------------|------|------|------------|------|------|------------|------|------|------------|------|------|
|                                                     | TT            | TC   | CC   | AA            | AG   | GG   | CC         | CT   | TT   | CC         | CT   | TT   | AA         | AC   | CC   |
| Egg-type and related breeds/populations             |               |      |      |               |      |      |            |      |      |            |      |      |            |      |      |
| LLB                                                 | 0.84          | 0.16 | 0    | 0             | 0    | 1.00 | 0.84       | 0.16 | 0    | 0.95       | 0.05 | 0    | 0          | 0    | 1.00 |
| RWG                                                 | 0.07          | 0.37 | 0.56 | 0.07          | 0.53 | 0.40 | 0.57       | 0.33 | 0.10 | 0.37       | 0.56 | 0.07 | 0.20       | 0.63 | 0.17 |
| RWS                                                 | 0.17          | 0.33 | 0.50 | 0.17          | 0.33 | 0.50 | 1.00       | 0    | 0    | 0.50       | 0.33 | 0.17 | 0.17       | 0.33 | 0.50 |
| RWP                                                 | 0             | 1.0  | 0    | 0.09          | 0.36 | 0.55 | 1.00       | 0    | 0    | 0.73       | 0.18 | 0.09 | 0.09       | 0.18 | 0.73 |
| AB                                                  | 0.10          | 0.40 | 0.50 | 0.05          | 0.55 | 0.40 | 0.20       | 0.55 | 0.25 | 0.35       | 0.45 | 0.20 | 0.70       | 0.25 | 0.05 |
| Ar                                                  | 0.10          | 0.35 | 0.55 | 0.05          | 0.40 | 0.55 | 0.15       | 0.65 | 0.20 | 0.20       | 0.40 | 0.40 | 0.75       | 0.25 | 0    |
| NN                                                  | 0.05          | 0.20 | 0.75 | 0.10          | 0.30 | 0.60 | 0.55       | 0.35 | 0.10 | 0.35       | 0.45 | 0.20 | 0.30       | 0.50 | 0.20 |
| F                                                   | 0.25          | 0.25 | 0.50 | 0.40          | 0.45 | 0.15 | 0.30       | 0.45 | 0.25 | 0.30       | 0.45 | 0.25 | 0.75       | 0.25 | 0    |
| Dual purpose and related breeds/populations         |               |      |      |               |      |      |            |      |      |            |      |      |            |      |      |
| <i>Egg-meat type and related breeds/populations</i> |               |      |      |               |      |      |            |      |      |            |      |      |            |      |      |
| MB                                                  | 0.05          | 0.37 | 0.58 | 0             | 0.16 | 0.84 | 0.47       | 0.36 | 0.17 | 0.68       | 0.21 | 0.11 | 0.31       | 0.53 | 0.16 |
| RIR                                                 | 0.03          | 0.50 | 0.47 | 0             | 0.38 | 0.62 | 0.47       | 0.38 | 0.15 | 0.22       | 0.44 | 0.34 | 0.25       | 0.62 | 0.13 |
| LGG                                                 | 0.10          | 0.20 | 0.70 | 0.45          | 0.35 | 0.20 | 0.15       | 0.35 | 0.50 | 0.25       | 0.40 | 0.35 | 0.75       | 0.25 | 0    |
| PB                                                  | 0.12          | 0.47 | 0.41 | 0.35          | 0.47 | 0.18 | 0.35       | 0.59 | 0.06 | 0.06       | 0.53 | 0.41 | 0.47       | 0.47 | 0.06 |
| SL                                                  | 0.15          | 0.60 | 0.25 | 0.42          | 0.37 | 0.21 | 0.25       | 0.55 | 0.20 | 0.35       | 0.60 | 0.05 | 0.85       | 0.15 | 0    |
| FS                                                  | 0             | 0.40 | 0.60 | 0.15          | 0.60 | 0.25 | 0.55       | 0.35 | 0.10 | 0.25       | 0.60 | 0.15 | 0.20       | 0.55 | 0.25 |
| RC                                                  | 0             | 0.37 | 0.63 | 0.16          | 0.32 | 0.52 | 0.32       | 0.58 | 0.10 | 0.26       | 0.53 | 0.21 | 0.47       | 0.47 | 0.06 |
| BB                                                  | 0             | 0.20 | 0.80 | 0.55          | 0.45 | 0    | 0.05       | 0.45 | 0.50 | 0          | 0.30 | 0.70 | 0.65       | 0.35 | 0    |
| BL                                                  | 0             | 0.30 | 0.70 | 0.10          | 0.35 | 0.55 | 0.35       | 0.55 | 0.10 | 0.05       | 0.50 | 0.45 | 0.25       | 0.55 | 0.20 |
| <i>Meat-egg type and related breeds/populations</i> |               |      |      |               |      |      |            |      |      |            |      |      |            |      |      |
| ZS                                                  | 0.05          | 0.39 | 0.56 | 0.28          | 0.67 | 0.05 | 0.11       | 0.33 | 0.56 | 0.11       | 0.33 | 0.56 | 0.94       | 0.06 | 0    |
| Pu                                                  | 0.05          | 0.10 | 0.85 | 1.00          | 0    | 0    | 0.10       | 0.40 | 0.50 | 0.10       | 0.40 | 0.50 | 1.00       | 0    | 0    |
| LMF                                                 | 0.10          | 0.52 | 0.38 | 0.24          | 0.67 | 0.09 | 0.05       | 0.52 | 0.43 | 0          | 0.52 | 0.48 | 0.71       | 0.29 | 0    |
| NH                                                  | 0.16          | 0.42 | 0.42 | 0.21          | 0.37 | 0.42 | 0.21       | 0.42 | 0.37 | 0.21       | 0.21 | 0.58 | 0.83       | 0.17 | 0    |
| ABS                                                 | 0.05          | 0.35 | 0.60 | 0.10          | 0.70 | 0.20 | 0.15       | 0.65 | 0.20 | 0.45       | 0.50 | 0.05 | 0.55       | 0.45 | 0    |
| AoB                                                 | 0             | 0.78 | 0.22 | 0.11          | 0.56 | 0.33 | 0.44       | 0.51 | 0.05 | 0.22       | 0.67 | 0.11 | 0.67       | 0.33 | 0    |
| Pm                                                  | 0.20          | 0.60 | 0.20 | 0.55          | 0.45 | 0    | 0.65       | 0.35 | 0    | 0.70       | 0.30 | 0    | 0.45       | 0.45 | 0.01 |
| PRB                                                 | 0.05          | 0.27 | 0.68 | 0.16          | 0.63 | 0.21 | 0.11       | 0.47 | 0.42 | 0.05       | 0.63 | 0.32 | 0.79       | 0.21 | 0    |
| PC                                                  | 0.29          | 0.59 | 0.12 | 0.06          | 0.29 | 0.65 | 0.29       | 0.65 | 0.06 | 0.06       | 0.71 | 0.23 | 0.94       | 0.06 | 0    |

|                                       |      |      |      |      |      |      |      |      |      |      |      |      |      |      |      |
|---------------------------------------|------|------|------|------|------|------|------|------|------|------|------|------|------|------|------|
| Ts                                    | 0.10 | 0.55 | 0.35 | 0    | 0.60 | 0.40 | 0.10 | 0.55 | 0.35 | 0.10 | 0.55 | 0.35 | 1.00 | 0    | 0    |
| YC                                    | 0.05 | 0.25 | 0.70 | 0.10 | 0.45 | 0.45 | 0.40 | 0.50 | 0.10 | 0.35 | 0.50 | 0.15 | 0.90 | 0.10 | 0    |
| OM                                    | 0.15 | 0.50 | 0.35 | 0.30 | 0.35 | 0.35 | 0.40 | 0.45 | 0.15 | 0.20 | 0.45 | 0.35 | 0.65 | 0.30 | 0.05 |
| UM                                    | 0.17 | 0.33 | 0.50 | 0.22 | 0.50 | 0.28 | 0.39 | 0.33 | 0.28 | 0.28 | 0.50 | 0.22 | 0.61 | 0.33 | 0.06 |
| SL × Ar                               | 0    | 0.64 | 0.36 | 0.36 | 0.36 | 0.28 | 0.07 | 0.64 | 0.29 | 0.22 | 0.71 | 0.07 | 0.93 | 0.07 | 0    |
| Ts × SL                               | 0.14 | 0.36 | 0.50 | 0.15 | 0.54 | 0.31 | 0.29 | 0.21 | 0.50 | 0.29 | 0.57 | 0.14 | 0.86 | 0.14 | 0    |
| Ts × (SL × Ar)                        | 0    | 0.31 | 0.69 | 0.50 | 0.29 | 0.21 | 0    | 0.31 | 0.69 | 0.14 | 0.22 | 0.64 | 1.00 | 0    | 0    |
| BL × SL                               | 0    | 0.36 | 0.64 | 0.08 | 0.21 | 0.71 | 0.29 | 0.50 | 0.21 | 0.21 | 0.50 | 0.29 | 0.50 | 0.29 | 0.21 |
| Meat and related breeds/populations   |      |      |      |      |      |      |      |      |      |      |      |      |      |      |      |
| WC1                                   | 0.06 | 0.27 | 0.67 | 0.43 | 0.34 | 0.23 | 0.06 | 0.28 | 0.66 | 0.17 | 0.33 | 0.50 | 1.00 | 0    | 0    |
| WC2                                   | 0.05 | 0.32 | 0.63 | 0.11 | 0.52 | 0.37 | 0.05 | 0.32 | 0.63 | 0.21 | 0.37 | 0.42 | 1.00 | 0    | 0    |
| WC × (BL × SL)                        | 0    | 0.21 | 0.79 | 0.07 | 0.72 | 0.21 | 0    | 0.21 | 0.79 | 0.21 | 0.43 | 0.36 | 1.00 | 0    | 0    |
| WC × (SL × Ar)                        | 0    | 0.36 | 0.64 | 0.14 | 0.36 | 0.50 | 0.07 | 0.43 | 0.50 | 0.14 | 0.29 | 0.57 | 0.79 | 0.21 | 0    |
| Game and related breeds/populations   |      |      |      |      |      |      |      |      |      |      |      |      |      |      |      |
| MG                                    | 0.25 | 0.60 | 0.15 | 0.10 | 0.30 | 0.60 | 0.45 | 0.40 | 0.15 | 0.25 | 0.55 | 0.20 | 0.80 | 0.20 | 0    |
| UG                                    | 0.05 | 0.26 | 0.69 | 0.11 | 0.52 | 0.37 | 0.05 | 0.27 | 0.68 | 0.11 | 0.53 | 0.36 | 0.95 | 0.05 | 0    |
| UG × Ar                               | 0.07 | 0.36 | 0.57 | 0.21 | 0.64 | 0.15 | 0.07 | 0.43 | 0.50 | 0    | 0.36 | 0.64 | 0.93 | 0.07 | 0    |
| Fancy breeds/populations              |      |      |      |      |      |      |      |      |      |      |      |      |      |      |      |
| PWB                                   | 0    | 0.11 | 0.89 | 0.06 | 0.22 | 0.72 | 0.72 | 0.28 | 0    | 0.72 | 0.22 | 0.06 | 0.22 | 0.28 | 0.50 |
| PS                                    | 0    | 0    | 1.00 | 0    | 0.05 | 0.95 | 0.95 | 0.05 | 0    | 0.20 | 0.40 | 0.40 | 0.40 | 0.40 | 0.20 |
| PW                                    | 0    | 0    | 1.00 | 0.07 | 0.13 | 0.80 | 0.80 | 0.20 | 0    | 0.40 | 0.53 | 0.07 | 0.20 | 0.47 | 0.33 |
| Bantam and related breeds/populations |      |      |      |      |      |      |      |      |      |      |      |      |      |      |      |
| RWD                                   | 0.11 | 0.50 | 0.39 | 0.28 | 0.39 | 0.33 | 0.06 | 0.61 | 0.33 | 0    | 0.22 | 0.78 | 0.83 | 0.17 | 0    |
| BMF                                   | 0    | 0    | 1.00 | 0    | 0.60 | 0.40 | 0.95 | 0.05 | 0    | 0.15 | 0.55 | 0.30 | 0.40 | 0.40 | 0.20 |
| HSSD                                  | 0.75 | 0.25 | 0    | 0.10 | 0.55 | 0.35 | 1.00 | 0    | 0    | 0    | 0    | 1.00 | 0    | 0.15 | 0.85 |
| SW                                    | 0    | 0    | 1.00 | 0.06 | 0.47 | 0.47 | 0.12 | 0.50 | 0.38 | 0.05 | 0.53 | 0.42 | 1.00 | 0    | 0    |
| CB                                    | 0    | 0.25 | 0.75 | 0.70 | 0.20 | 0.10 | 0.05 | 0    | 0.95 | 0.70 | 0.20 | 0.10 | 0.95 | 0    | 0.05 |

<sup>1</sup> Abbreviations for breed names are given in accordance with Table S1.
